# Supplementary material for: The association of cycling with all-cause, cardiovascular and cancer mortality: findings from the population-based EPIC-Norfolk cohort
Source: PubMed Central journal article supplement (PMC3831097; doi:10.1136/bmjopen-2013-003797), 2013-11-14
Supplement: bmjopen-2013-003797.draft_revisions.pdf [file bmjopen-2013-003797.draft_revisions.pdf]

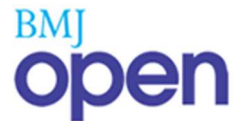

**The association of cycling with all-cause, cardiovascular and cancer mortality: findings from the population based EPIC-Norfolk cohort**

|                                 |                                                                                                                                                                                                                                                                                                                                                                                                                                                                                                                                                                                                                                                                                                                                                                                                                                                   |
|---------------------------------|---------------------------------------------------------------------------------------------------------------------------------------------------------------------------------------------------------------------------------------------------------------------------------------------------------------------------------------------------------------------------------------------------------------------------------------------------------------------------------------------------------------------------------------------------------------------------------------------------------------------------------------------------------------------------------------------------------------------------------------------------------------------------------------------------------------------------------------------------|
| Journal:                        | <i>BMJ Open</i>                                                                                                                                                                                                                                                                                                                                                                                                                                                                                                                                                                                                                                                                                                                                                                                                                                   |
| Manuscript ID:                  | bmjopen-2013-003797                                                                                                                                                                                                                                                                                                                                                                                                                                                                                                                                                                                                                                                                                                                                                                                                                               |
| Article Type:                   | Research                                                                                                                                                                                                                                                                                                                                                                                                                                                                                                                                                                                                                                                                                                                                                                                                                                          |
| Date Submitted by the Author:   | 13-Aug-2013                                                                                                                                                                                                                                                                                                                                                                                                                                                                                                                                                                                                                                                                                                                                                                                                                                       |
| Complete List of Authors:       | Sahlqvist, Shannon; Deakin University, Centre for Physical Activity and Nutrition Research (C-PAN); Institute of Public Health, UKCRC Centre for Diet and Activity Research<br>Goodman, Anna; London School of Hygiene and Tropical Medicine, Faculty of Epidemiology and Population Health<br>Simmons, Rebecca; Medical Research Council, Epidemiology Unit<br>Khaw, KayTee; University of Cambridge, Department of Gerontology in Clinical Medicine<br>Cavill, Nick; Cavill Associates,<br>Foster, Charles; University of Oxford, Department of Public Health<br>Luben, Robert; University of Cambridge, Department of Public Health and Primary Care, Institute of Public Health, School of Clinical Medicine<br>Wareham, Nicholas; Medical Research Council, Epidemiology Unit<br>Ogilvie, David; Medical Research Council, Epidemiology Unit |
| <b>Primary Subject Heading</b>: | Epidemiology                                                                                                                                                                                                                                                                                                                                                                                                                                                                                                                                                                                                                                                                                                                                                                                                                                      |
| Secondary Subject Heading:      | Epidemiology, Public health, Sports and exercise medicine                                                                                                                                                                                                                                                                                                                                                                                                                                                                                                                                                                                                                                                                                                                                                                                         |
| Keywords:                       | active travel, active commuting, physical activity                                                                                                                                                                                                                                                                                                                                                                                                                                                                                                                                                                                                                                                                                                                                                                                                |
|                                 |                                                                                                                                                                                                                                                                                                                                                                                                                                                                                                                                                                                                                                                                                                                                                                                                                                                   |

SCHOLARONE™  
Manuscripts

1 **The association of cycling with all-cause, cardiovascular and cancer mortality: findings from the**  
2 **population based EPIC-Norfolk cohort**

3  
4 Shannon Sahlqvist<sup>1,2,3</sup>, Anna Goodman<sup>2,4</sup>, Rebecca K. Simmons<sup>1</sup>, Kay-Tee Khaw<sup>5</sup>, Nick Cavill<sup>6,7</sup>, Charlie Foster<sup>7</sup>,  
5 Robert Luben<sup>8</sup>, Nicholas J. Wareham<sup>1,2</sup> & David Ogilvie<sup>1,2</sup>  
6

7 <sup>1</sup>Medical Research Council Epidemiology Unit, University of Cambridge, UK

8 <sup>2</sup>UKCRC Centre for Diet and Activity Research (CEDAR), University of Cambridge, UK

9 <sup>3</sup>Centre for Physical Activity and Nutrition Research (C-PAN), School of Exercise and Nutrition Sciences, Deakin  
10 University, Geelong, Australia

11 <sup>4</sup>Faculty of Epidemiology and Population Health, London School of Hygiene and Tropical Medicine, London, UK

12 <sup>5</sup>Department of Gerontology in Clinical Medicine, University of Cambridge, UK

13 <sup>6</sup>Cavill Associates, Stockport, UK

14 <sup>7</sup>British Heart Foundation Health Promotion Research Group, Nuffield Department of Population Health,  
15 University of Oxford, UK

16 <sup>8</sup>Department of Public Health and Primary Care, Institute of Public Health, University of Cambridge School of  
17 Clinical Medicine, Cambridge, UK  
18

19 Corresponding Author:

20 Shannon Sahlqvist

21 Centre for Physical Activity and Nutrition Research (C-PAN)

22 School of Exercise and Nutrition Sciences

23 Faculty of Health

24 Locked Bag 2000

25 Geelong Victoria 3220 Australia

26 Email: shannon.sahlqvist@deakin.edu.au

27 Telephone: 0061 3 9251 7782

28 Fax: 0061 2 5337 2211  
29

30 Word Count: 3822

31 Number of pages: 23

32 Numbers of tables: 5  
33

34

35 **ABSTRACT**

36 Objectives: To investigate associations between modest levels of total and domain-specific (commuting, other  
37 utility, recreational) cycling and mortality from all causes, cardiovascular disease and cancer.

38 Design: Population-based cohort study (EPIC-Norfolk).

39 Setting: Participants were recruited from general practices in the east of England and attended health  
40 examinations between 1993 and 1997 and again between 1998 and 2000. At the first health assessment,  
41 participants reported their average weekly duration of cycling for all purposes using a simple measure of physical  
42 activity. At the second health assessment, participants reported a more detailed breakdown of their weekly  
43 cycling behaviour using the EPAQ2 physical activity questionnaire.

44 Participants: Adults aged 40 – 79 years at the first health assessment.

45 Primary Outcome Measure: All participants were followed for mortality (all-cause, cardiovascular and cancer)  
46 until March 2011.

47 Results: There were 22,450 participants with complete data at the first health assessment, of whom 4,398 died  
48 during follow-up; and 13,346 participants with complete data at the second health assessment, of whom 1,670  
49 died during follow-up. Preliminary analyses using exposure data from the first health assessment showed that  
50 cycling for at least 60 min/week in total was associated with a 9% reduced risk of all-cause mortality (adjusted  
51 hazard ratio 0.91, 95%CI 0.84, 0.99). Using the more precise measures of cycling available from the second  
52 health assessment, although all types of cycling were associated with greater total moderate-to-vigorous physical  
53 activity, there was little evidence of an association between overall or domain-specific cycling and mortality.

54 Conclusions: While this study provides tentative evidence that modest levels of cycling may reduce the risk of  
55 mortality, further research is required to confirm how much cycling is sufficient to induce health benefits.

56 Keywords: active travel, physical activity, commuting

57 **ARTICLE SUMMARY**

## 58 Article Focus

59 Cycling, particularly for transport, is promoted as a way of increasing regular physical activity among adults.  
60 Longitudinal studies have demonstrated associations between utility cycling and reduced mortality. However,  
61 these associations have been reported only for the highest exposure groups reporting substantial volumes of  
62 cycling (i.e.  $\geq 180$  min/wk).

63 We examined associations between mortality and lower volumes of total, and domain-specific, cycling in a  
64 population of UK adults.

## 65 Key Message

66 In this population with relatively low levels of cycling, preliminary analyses using a single item to measure total  
67 cycling revealed that cycling for as little as 60 min/week in total was associated with a reduced risk of all-cause  
68 mortality.

69 By contrast, in more substantive analyses using a detailed breakdown of cycling behaviour, neither total nor  
70 domain-specific cycling were associated with a reduced risk of mortality.

71 Our results suggest that even modest 'doses' of cycling *may* reduce mortality risk and do not suggest any  
72 evidence of an adverse effect, thereby contributing to the growing environmental, social and public health case  
73 for promoting cycling in individuals and populations.

## 74 Strengths and Limitations of this Study

75 Strengths of this study include its prospective design, the inclusion of a large heterogeneous population of men  
76 and women and the long follow-up. Further, this study used detailed measures of cycling and overall physical  
77 activity to examine associations between the various domains of cycling and mortality.

78 Due to the low average levels of cycling we were not able to examine the specific effects of a higher 'dose' of  
79 cycling, and the analyses were underpowered to examine sex differences in the associations between cycling  
80 and mortality.

81

## 82 INTRODUCTION

83 Promoting cycling as an alternative to motorised transport would result in reduced carbon emissions, traffic  
84 congestion and noise pollution while providing people with an opportunity to integrate regular physical activity  
85 into their lives.<sup>1,2</sup> As such, there is increasing policy interest in quantifying the health benefits of cycling so that  
86 they can be accurately modelled in the economic appraisal of proposed policies and interventions in the transport  
87 and health sectors.<sup>3,4</sup> One such tool developed by the World Health Organisation (Health Economic Assessment  
88 Tool; HEAT) estimates the economic value of a reduction in mortality as a consequence of population increases  
89 in cycling.<sup>5</sup> It does so by assuming a linear dose-response relationship between cycling and mortality and that  
90 any increase in cycling is in addition to other physical activity.

91 HEAT model estimates are dependent on the use of a relative risk estimate from a single study of Danish adults.  
92 The study reported a 28% reduction in all-cause mortality in adults who cycled to and from work compared with  
93 those who did not, even after controlling for other physical activity.<sup>6</sup> Similarly, an inverse association between  
94 transport (utility) cycling more generally and all-cause and cancer mortality has been reported in a cohort of  
95 Chinese women.<sup>7</sup> These findings are likely to reflect, in part, the fact that utility cycling translates into greater  
96 overall physical activity.<sup>8,9</sup>

97 While these studies suggest substantial health benefit associated with utility cycling, an examination of the  
98 benefits of recreational cycling would also be valuable to enable more informed policy recommendations on  
99 which type of cycling to promote.

100 Furthermore, it is possible that the findings from these studies reflect, at least to some extent, residual  
101 confounding from 'other' physical activity. In particular, the Danish study controlled for recreational physical  
102 activity using responses to a single item which asked participants to select from one of four options ranging from  
103 'you are almost entirely sedentary or perform light physical activity less than two hours per week' to 'you perform  
104 highly vigorous physical activity more than four hours per week or regular exercise or competitive sports several  
105 times per week'.<sup>6</sup> The extent to which responses to this item were independent of those regarding commuter  
106 cycling was not reported.

107 In addition, in the two prior studies which reported associations between utility cycling and mortality, the time  
108 spent cycling for transport in the exposed groups was substantial, reflecting the relatively high levels of cycling in  
109 those countries. For example, in the Danish study, those who commuted by bike spent an average of 180  
110 min/week doing so.<sup>6</sup> In the study of Chinese women, 19% cycled for up to 3.4 Metabolic Equivalents  
111 (MET).hr/day while a further 5% cycled for greater than 3.5 MET.hr/day, equivalent to approximately 350  
112 min/week.<sup>7</sup> Few studies have examined associations between cycling and mortality in populations such as that of  
113 the UK, which have a low prevalence of utility cycling by international standards. One previous study of adults in  
114 the EPIC-Norfolk cohort found no significant association between commuter cycling and either cardiovascular or  
115 all-cause mortality.<sup>10</sup> These null findings may partly reflect the cut points used to define cycling categories: the  
116 cut point for the highest category was 30 min/week, which may be an insufficient 'dose' to induce health benefits.  
117 It is also possible that the relatively short duration of follow-up (seven years) and the small number of deaths in  
118 the cohort limited the power of the study to detect effects.

119 Building on these previous analyses of EPIC-Norfolk cohort data, this paper aims to investigate more  
120 comprehensively the mortality benefits of cycling. First, we use a simple pragmatic measure of physical activity to  
121 examine associations between total cycling and all-cause, cardiovascular and cancer mortality over 15 years.  
122 Second, using a more detailed, disaggregate measure of physical activity which provides more accurate  
123 estimates of domain-specific cycling (commuting, all utility, and recreational) for a subset of our sample, we  
124 explore whether this association is driven by particular domains of cycling (e.g. utility vs. recreational). Finally, to  
125 help explain any associations between domain-specific cycling and mortality, we examine associations between  
126 these domains of cycling and total physical activity.

127

**METHODS****Study design and participants**

This study uses data from the EPIC-Norfolk cohort, part of the 10-country collaborative European Prospective Investigation into Cancer and Nutrition study (EPIC). Between 1993 and 1997, 25,633 adults aged 40 – 79 years were recruited from general practices in the county of Norfolk in the east of England and attended a health examination. As part of this examination, participants completed a short physical activity questionnaire which asked about time spent walking and cycling for all purposes and time spent in other exercise.<sup>12</sup> Between January 1998 and October 2000, 15,519 (61%) of the original cohort attended a second health assessment, completing a more detailed questionnaire on recreational, occupational, utility and household physical activity (EPAQ2).<sup>13</sup>

Data from the first health assessment were used to examine the association between total cycling and mortality, while data from the second were used to examine the association between the domains of cycling and mortality. Full details of the study are reported elsewhere.<sup>11</sup>

Of the participants in the first health assessment, we excluded those with self-reported cardiovascular disease (n=1,102) or cancer (n=1,327) and those with missing data (n=784) leaving 22,450 for analysis.

Similarly, of those who returned for the second health assessment, we excluded those with self-reported cardiovascular disease (n=772) or cancer (n=1,115) and those with missing data (n=286), leaving 13,346 for analysis. All participants were followed up for mortality to 31 March 2011 (mean 15.3 years (SD=3.3) from first health assessment, mean 11.5 years (SD = 2.0) from second health assessment). The Norwich District Health Authority Ethics Committee approved the study design and all participants provided written informed consent.

**Health assessments**

At both health assessments participants reported their level of education (categorised as no formal qualification; GCSE or equivalent, i.e. exams normally taken at age 16; 'A' level or equivalent, i.e. exams normally taken at age 18; university degree or equivalent), paid employment status (yes, no), social class (categorised as professional, managerial/technical job, skilled/partially skilled labour, unskilled labour), smoking status (current, former, never), anti-hypertensive medication (yes, no), medication for dyslipidaemia (yes, no) and family history of cancer and cardiovascular disease (yes, no). History of myocardial infarction, stroke, and cancer were also reported. Total energy intake (kJ/day) and alcohol consumption (units/week) were derived from a validated 130-item semi-quantitative food-frequency questionnaire.<sup>14</sup>

**Measurement of physical activity at first health assessment**

Physical activity was assessed by asking participants to report, separately for winter and summer, the weekly time (in hours) spent walking and cycling (separately) to work and during leisure, and in other exercise.<sup>12</sup> Total cycling was calculated as the average weekly time spent in winter and summer (min/week). See Appendix, part 1.

**Measurement of physical activity at second health assessment**

Physical activity, including cycling, was assessed with the validated and reliable EPAQ2 questionnaire, which asks participants to recall their physical activity behaviour across the domains of household, work, recreation and commuting, over the past year.<sup>13</sup> Energy expenditure [MET.hr/week] was calculated using the physical activity compendium.<sup>15</sup> Following standard EPAQ2 data reduction rules we calculated four specific cycling measures explained in detail in Table 1. In addition, total moderate-to-vigorous physical activity was calculated as the sum of all moderate and vigorous physical activity across all domains (home, work, recreation and commuting; MET.hr/week) and recreational physical activity was computed as the sum of all moderate and vigorous activity done during recreation specifically (MET.hr/week). A copy of the questionnaire can be found at: <http://www.srl.cam.ac.uk/epic/questionnaires/epaq2/epaq2.pdf>.



1 171 [Insert Table 1 about here]

2  
3 172 **Cycling exposure**

4  
5 173 Given the highly skewed nature of the cycling data and to allow for comparisons with previous studies, we  
6 174 created three categories of cycling exposure: 0 min/week, 1 – 59 min/week and  $\geq$  60 min/week. These represent  
7 175 levels of cycling which we believe are realistic to achieve in countries such as the UK, which currently have low  
8 176 levels of utility cycling. For our measures of utility cycling from the second health assessment these categories  
9 177 are equivalent to: 0 miles/week; 0.01– 9.99 miles/week and  $\geq$  10 miles/week.

10  
11 178 **Mortality outcomes**

12  
13 179 All EPIC-Norfolk participants were flagged for death certification with the UK Office of National Statistics (ONS).  
14 180 Trained nosologists coded death certificates according to the ICD-9 or ICD-10. Cardiovascular death was defined  
15 181 as ICD 410–448 (ICD 9) or ICD I10–I79 (ICD 10) as underlying cause of death, which comprise coronary heart  
16 182 disease (410–414 (ICD 9) or I20–I25 (ICD 10)), stroke (430–438 (ICD 9) or I60–I69 (ICD 10)), cardiac failure  
17 183 (428 (ICD 9) or I50 (ICD 10)) and other vascular causes. Cancer death was defined as ICD 140-208 (ICD9) or  
18 184 ICD C00 – C97 (ICD10) as the underlying cause.

19  
20  
21 185 **Statistical analysis**

22  
23 186 We used exposure data from the first health assessment to examine associations between total cycling and all-  
24 187 cause, cardiovascular and cancer mortality. Exposure data from the second health assessment were used to  
25 188 explore associations between total, and domain specific cycling and mortality and overall physical activity. First,  
26 189 using data collected from the first health assessment, we examined preliminary associations between total  
27 190 cycling and all-cause, cardiovascular and cancer mortality by fitting Cox proportional hazard regression models to  
28 191 estimate hazard ratios and 95% confidence intervals. We first adjusted for sex, age, education level and social  
29 192 class (Model A) and then further adjusted for smoking status, family history of cardiovascular disease or cancer,  
30 193 as well as time spent walking and in other exercise. As sensitivity analyses, we ran a further two models. In the  
31 194 first we adjusted for weekly alcohol consumption and calorie intake; 4% (n=912) of participants had missing data  
32 195 for these variables. In the second, we further adjusted for medication (hypertension and dyslipidaemia) and type  
33 196 2 diabetes as we thought it possible they could be mediating variables on the causal pathway between cycling  
34 197 and mortality. Results of these sub-group analyses did not differ substantially from those of Model B and are not  
35 198 presented. Models were also run after excluding participants who died within two years of follow-up (n=181) to  
36 199 minimise the potential effect of reverse causality. This made no substantive differences to the findings (data not  
37 200 presented).

38  
39  
40  
41 201 We then examined the associations between the domains of cycling and mortality, again by fitting Cox  
42 202 proportional hazard regression models. Equivalent models to those described above were run except that Model  
43 203 B also controlled for all other physical activity energy expenditure (calculated as the sum of all energy  
44 204 expenditure in all domains of physical activity minus that of the respective cycling behaviour). To account for the  
45 205 potentially conservative estimates of commuting cycling undertaken when cycling was selected alongside other  
46 206 modes (see Table 1), by way of sensitivity analysis we applied an alternative assumption that commuter cycling  
47 207 was done for 30% (rather than 10%) of these journeys. Findings remained largely unchanged when using these  
48 208 new estimates. Again, our results were substantively unchanged after adjusting for weekly alcohol consumption  
49 209 and calorie intake, after further adjustment for medication and type 2 diabetes, or after excluding the 102  
50 210 participants who died within two years of follow-up (data not presented).

51  
52  
53  
54 211 For all models the proportional hazard assumption was verified using Schoenfeld residuals and Kaplan-Meier  
55 212 plots for all three outcomes. For all models, we also present p-values for linear trend, calculated by entering the  
56 213 domains of cycling as continuous rather than categorical variables.

1 214 To examine whether any observed associations between cycling and mortality could be explained by differences  
2 215 in overall levels of physical activity, we examined associations between the domains of cycling and physical  
3 216 activity (total leisure-time, total moderate-to-vigorous across all domains, and total light, moderate and vigorous  
4 217 across all domains) by fitting linear regression models with time spent cycling (total and sub domains) as the  
5 218 exposure variables and time spent in (a) recreational and (b) total moderate-to-vigorous physical activity  
6 219 (MET.hr/week) as the outcome variables controlling for sex, age, social class and highest level of education. All  
7 220 analyses were conducted using STATA, version 12.0 (Stata Corp., TX, USA).

## 9 221 RESULTS

### 10 222 Participant characteristics

11 223 At the first health assessment, participants had a mean age of 58 years (SD=19) and just over half were women  
12 224 (55%). 24% of participants reported cycling for a mean of 165 min/week (SD=246). Socio-demographic  
13 225 characteristics of the cohort by cycling status (yes, no) are described in Table 2 (for further details of the baseline  
14 226 characteristics of the sample see Appendix, part 2, Table A1). Respondents who reported any cycling were, on  
15 227 average, younger and more likely to be men. Respondents with no formal qualification were also more likely to  
16 228 cycle compared with respondents with GCSE-level qualifications, while those in skilled or unskilled labour were  
17 229 more likely to cycle than professionals.

18 230 [Insert Table 2 about here]

19 231 By the second health assessment participants had a mean age of 62 (SD 9) years; just over half were women  
20 232 (57%). 30% (n=4030) reported any cycling. Of those who cycled, 62% (n=2808) reported cycling for recreation  
21 233 and 72% (n=3269) reported cycling for utility purposes with 26% (n=862) of these reporting commuting cycling.  
22 234 The average cyclist spent 83 min/week cycling. Those who commuted by bicycle spent an average of 61  
23 235 min/week doing so, while those who cycled for recreation spent an average of 58 min/week doing so. Again, men  
24 236 and those who were younger were more likely to cycle. In addition to the sociodemographic associations  
25 237 observed in data from the first health assessment, respondents working in a managerial/technical position were  
26 238 less likely to cycle than professionals. Employment status also showed a strong association with cycling,  
27 239 probably reflecting the fact that commuting was included in the measure of cycling (see Appendix, part 2, Table  
28 240 A2).

### 29 241 Total cycling (first health assessment) and mortality

30 242 4,398 (20%) participants died during 3,425,498 person-years of follow-up (Table 3). There were 1,379 (6.1%)  
31 243 cardiovascular deaths and 1,639 (7.3%) cancer deaths (see Appendix, Part 2, Table A3). Risk of death was  
32 244 associated with being men, older, and having a lower level of education and social class.

33 245 Cycling for at least 60 min/week was associated with a 9% reduction in all-cause mortality after controlling for  
34 246 potential confounders (HR 0.91, 95% CI 0.84, 0.99; Table 3). This seemed to be driven by the protective  
35 247 association between cycling and cardiovascular mortality (HR 0.85, 95% CI 0.72, 0.99). There were no significant  
36 248 associations between cycling and cancer mortality.

37 249 [Insert Table 3 about here]

### 38 250 Domains of cycling (second health assessment) and mortality

39 251 1,670 (12.5%) individuals died during 149,072 person-years of follow-up. There were 485 (3.6%) cardiovascular  
40 252 deaths and 700 (5.2%) cancer deaths. Again mortality rates were higher among men and older participants (data  
41 253 not shown). There were no significant associations between commuting cycling and all-cause, cardiovascular or  
42 254 cancer mortality in either the minimally adjusted (A) or the additionally adjusted (B) models (Table 4). For both  
43 255 all-cause and cancer mortality, however, there was suggestion of a dose-response relationship between distance  
44 256 cycled and risk of death whereby the lowest hazard ratios were observed for the highest levels of commuting



1 257 cycling, albeit not reaching statistical significance. There was no association between all utility cycling and all-  
2 258 cause, cardiovascular or cancer mortality in either the minimally adjusted (A) or the additionally adjusted (B)  
3 259 models. In minimally adjusted models, recreational cycling for less than 60 min/week was associated with a 19%  
4 260 reduced risk (95% CI 0.66, 0.99). Further adjusted attenuated the effect. There were no significant associations  
5 261 between total cycling and mortality.

7 262 [Insert Table 4 about here]

### 9 263 **Association between domains of cycling and total physical activity (second health assessment)**

11 264 Total and domain-specific cycling was associated with greater levels of physical activity in an approximately  
12 265 dose-response relationship (Table 5). All utility, recreation and total, but not commuting, cycling were associated  
13 266 with greater recreational physical activity. Importantly, however, commuting cycling was not inversely associated  
14 267 with recreational physical activity, suggesting that adults were not cycling to and from work to compensate for a  
15 268 lack of recreational physical activity. The association between cycling and recreational physical activity was  
16 269 strongest for recreational cycling; those who spent 1 to 59 min/week cycling for pleasure participated in an  
17 270 additional 3 MET.hr/day of recreational physical activity (equivalent to approximately 36 min/day of moderate  
18 271 intensity physical activity).

21 272 All domains of cycling showed significant dose-response relationships with total moderate-to-vigorous physical  
22 273 activity, although the association was strongest for commuting cycling. Those who cycled for  $\geq 60$  min/week  
23 274 spent an additional 7.9 MET.hr/day in moderate-to-vigorous physical activity, (equivalent to 94.8 min/day of  
24 275 moderate intensity physical activity) compared with those who did not.

27 276 [Insert Table 5 about here]

## 29 277 **DISCUSSION**

31 278 We used data from a large population-based cohort to examine the associations between total and domain-  
32 279 specific cycling and mortality. Across all domains, cyclists were more likely to be younger and men, a finding that  
33 280 is consistent with previous studies conducted in countries that have low rates of utility cycling<sup>16-18</sup> but different  
34 281 from the pattern in a number of other European countries where men and women, and the young and old, are  
35 282 equally likely to cycle.<sup>19</sup>

37 283 Using exposure data from the first health assessment, cycling for at least 60 min/week in total was associated  
38 284 with a 9% reduction in risk of all-cause, and a 15% reduction in risk of cardiovascular, mortality but was not  
39 285 associated with cancer mortality. In the absence of any directly comparable data on total cycling from other  
40 286 studies, these findings provide tentative evidence that modest 'doses' of cycling may be associated with a  
41 287 reduction in mortality risk. They are also broadly consistent with the findings of the Danish study in which a  
42 288 reduction in mortality risk (28%) was associated with an average quantity of cycling that was three times higher  
43 289 (180min/week).<sup>6</sup>

46 290 That being said, when using more precise measures of cycling we found no significant associations between  
47 291 total or domain-specific cycling and mortality. This was despite the fact that all domains of cycling, and commuter  
48 292 cycling in particular, were associated with higher levels of overall physical activity. On the one hand, these  
49 293 differences could reflect a lack of power in analyses of the second health assessment data, which included fewer  
50 294 participants and had a shorter follow-up period. On the other hand, the more precise measures of physical  
51 295 activity may have not only enabled more accurate categorisation of cycling exposure, but also reduced  
52 296 measurement error regarding the confounding effect of 'other' physical activity.

55 297 Despite five additional years of follow-up and the examination of a higher 'dose' of cycling, our null findings  
56 298 relating to the mortality benefits of commuting and utility cycling in particular mirror those previously reported in  
57 299 this cohort<sup>10</sup> and are consistent with those of previous studies of low-cycling populations in Northern Ireland and

1 300 France, which found no evidence of a reduced risk of fatal or nonfatal myocardial infarction in men who reported  
2 301 any walking or cycling to work compared with those who did not.<sup>20</sup>

3  
4 302 They are however in contrast to the findings of the studies of Danish<sup>6</sup> and Chinese<sup>7</sup> adults and of a meta-  
5 303 analysis, which pooled evidence from eight studies (from five independent populations) and found that active  
6 304 commuting (walking and cycling) was associated with an overall 11% reduction in the risk of cardiovascular  
7 305 outcomes.<sup>21</sup> Importantly, the levels of commuting cycling reported by participants in these previous studies were  
8 306 substantial and in the meta-analysis, evidence of protective effects was generally limited to higher levels of active  
9 307 commuting.<sup>21</sup> The high 'doses' of utility cycling reported in previous studies are likely to be achieved when cycling  
10 308 journeys are taken frequently and consistently (e.g. twice daily, five days per week). It is possible that frequent  
11 309 short bursts of physical activity of this kind are beneficial to health in their own right, rather than simply by  
12 310 contributing to greater levels of total physical activity as we have shown. In support of this hypothesis, studies  
13 311 have demonstrated that accumulated short bouts of exercise over the day result in longer post-exercise  
14 312 reductions in blood pressure<sup>22</sup> and lower plasma triglycerides<sup>23</sup> than one continuous session of exercise. There is  
15 313 also some evidence that the intensity of cycling is important. A study of Danish adults found a significant inverse  
16 314 association between cycling intensity and all-cause and coronary heart disease mortality,<sup>24</sup> and it may be that  
17 315 participants in our study were not cycling at an intensity sufficient to result in health benefit. It is also possible that  
18 316 the differences reflect the fact that our cohort was older than the Danish and Chinese cohorts.

19  
20  
21  
22 317 To further elucidate the health benefits of cycling and refine the use of tools such as HEAT that may be used to  
23 318 inform policy in this area, future research should aim to estimate the association between cycling and mortality  
24 319 independent of other physical activity, measured with as little error as possible; to extend such analyses to  
25 320 include morbidity endpoints such as incident cardiovascular disease and diabetes; and to clarify how much  
26 321 cycling is sufficient to induce health benefits by quantifying the mean quantity (and preferably intensity) of cycling  
27 322 in each exposure category studied and describing the shape of the dose-response relationship. In the meantime,  
28 323 our results suggest that even modest 'doses' of cycling *may* reduce mortality risk and do not suggest any  
29 324 evidence of an adverse effect, thereby contributing to the growing environmental, social and public health case  
30 325 for promoting cycling in individuals and populations.

### 31 326 **Strengths and limitations**

32  
33  
34  
35 327 This is the first study to examine independent associations between total and domain-specific cycling and  
36 328 mortality. Other strengths of the study include its prospective design, the inclusion of a large heterogeneous  
37 329 population of men and women and its long follow-up. We adjusted our analyses of the second health  
38 330 assessment data for all types of physical activity as well as a range of potential demographic and behavioural  
39 331 confounders which strengthens the inferences made. Excluding participants with existing chronic disease and  
40 332 those who died within two years of follow-up enabled us to control for reverse causality. Given the population-  
41 333 based recruitment from a large geographical area, we believe that our findings are generalizable to middle and  
42 334 older aged adults. There are, however, a number of limitations. Cycling and total physical activity were assessed  
43 335 by self-report. The cycling exposure variables, in particular utility cycling, were derived from relatively crude  
44 336 measures and assumptions had to be made about frequency of cycling, distance travelled and average speed.  
45 337 Due to the low average levels of cycling, we were not able to examine the specific effects of a high 'dose' of  
46 338 cycling and the analyses were underpowered to examine sex differences in the associations which have been  
47 339 previously documented.<sup>21</sup>

### 48 340 **Conclusions**

49  
50  
51  
52  
53 341 Building on previous research that demonstrated inverse associations between high doses of utility cycling and  
54 342 mortality, we used data from a large, population-based cohort to examine associations between more modest  
55 343 levels of cycling and mortality. Our preliminary findings add tentative support to the hypothesis that lower levels  
56 344 of cycling are also associated with a reduced risk of mortality compared with not cycling at all. However, this  
57 345 finding was not replicated in subsequent analyses using more detailed measures of exposure, albeit in fewer

1 346 participants who were followed up for a shorter period. Nevertheless, the positive association between cycling in  
2 347 general, and commuting cycling in particular, and overall physical activity suggests that encouraging people to  
3 348 cycle is likely to have considerable health benefits.

4  
5 349  
6  
7  
8  
9  
10  
11  
12  
13  
14  
15  
16  
17  
18  
19  
20  
21  
22  
23  
24  
25  
26  
27  
28  
29  
30  
31  
32  
33  
34  
35  
36  
37  
38  
39  
40  
41  
42  
43  
44  
45  
46  
47  
48  
49  
50  
51  
52  
53  
54  
55  
56  
57  
58  
59  
60

For peer review only

1 350 **Acknowledgements:** We thank Dr Søren Brage and Dr Marcel Den Hoed for their assistance in cleaning the  
2 351 EPAQ2 data.

3  
4 352 **Contributors:** DO and CF conceived the idea of the analysis and SS and DO designed the analysis with advice  
5 353 from the other authors. SS analysed the data and wrote the initial draft of the manuscript with DO, AG and RKS.  
6 354 KTK, NW and RL contributed to the design of the EPIC-Norfolk study protocol. All authors contributed to the  
7 355 critical review of the design of the analysis and the critical revision of the manuscript and approved the final  
8 356 version.

9  
10 357 **Funding:** DO is supported by the Medical Research Council (Unit Programme number MC\_UP\_1001/1) and by  
11 358 the Centre for Diet and Activity Research (CEDAR), a UKCRC Public Health Research Centre of Excellence  
12 359 which also hosted SS and AG. Funding from the British Heart Foundation, Economic and Social Research  
13 360 Council, Medical Research Council, the National Institute for Health Research, and the Wellcome Trust, under the  
14 361 auspices of the UK Clinical Research Collaboration, is gratefully acknowledged. AG is supported by a National  
15 362 Institute of Health Research (NIHR) post-doctoral fellowship. The views and opinions expressed in this article are  
16 363 those of the authors and do not necessarily reflect those of the NIHR, the Department of Health or other study  
17 364 funders. The EPIC-Norfolk study is funded by the Cancer Research Campaign; the Medical Research Council,  
18 365 the Stroke Association, the British Heart Foundation, the Department of Health, the Europe Against Cancer  
19 366 Programme Commission of the European Union and Ministry of Agriculture, Fisheries and Food. The authors  
20 367 thank the EPIC-Norfolk staff and participants for their valuable contributions.

21 368 **Competing Interests:** None

22 369 **Ethics Approval:** The Norwich District Health Authority Ethics Committee approved the study design and all  
23 370 participants provided written informed consent.

24 371

## 372 REFERENCES

- 373 1. Woodcock J, Banister D, Edwards P, Prentice AM, Roberts I. Energy and Health 3. *Lancet*  
374 2007;370(9592):1078-88.
- 375 2. Shepard R. Is active commuting the answer to population health? *Sports Med* 2008;38(9):751-58.
- 376 3. Jarrett J, Woodcock J, Griffiths UK, Chalabi Z, Edwards P, Roberts I, et al. Effect of increasing active travel in  
377 urban England and Wales on costs to the National Health Service. *Lancet* 2012;379:2198-205.
- 378 4. Woodcock J, Givoni M, Morgan AS. Health Impact Modelling of Active Travel Visions for England and Wales  
379 Using an Integrated Transport and Health Impact Modelling Tool (ITHIM). *Plos One* 2013;8(1):e51462.
- 380 5. Kahlmeier S, Cavill N, Dinsdale H, Rutter H, Götschi T, Foster C, et al. Health economic assessment tools  
381 (HEAT) for walking and for cycling: World Health Organization, 2011.
- 382 6. Andersen L, Schnohr P, Schroll M, Hein A. All-cause mortality associated with physical activity during leisure  
383 time, work, sports, and cycling to work. *Arch Intern Med* 2000;160:1621-28.
- 384 7. Matthews CE, Jurj AL, Shu X, Li H-L, Yang G, Li Q, et al. Influence of exercise, walking, cycling and overall  
385 nonexercise physical activity on mortality in Chinese women. *Am J Epidemiol* 2007;165(12):1343-50.
- 386 8. Sahlqvist S, Song Y, Ogilvie D. Is active travel associated with greater physical activity? The contribution of  
387 commuting and non-commuting active travel to total physical activity in adults. *Prev Med*  
388 2012;55(3):206-11.
- 389 9. Sahlqvist S, Goodman A, Cooper A, Ogilvie D, on behalf of the iConnect consortium. Change in active travel  
390 and changes in recreational and total physical activity in adults: longitudinal findings from the iConnect  
391 study. *Int J Behav Nutr Phys Act* 2013;10(1):28.
- 392 10. Besson H, Ekelund U, Brage S, Luben R, Bingham S, Khaw K-T, et al. Relationship between subdomains of  
393 total physical activity and mortality. *Med Sci Sport Exer* 2008;40(11):1909-15.
- 394 11. Day N, Oakes S, Luben R, Khaw K-T, Bingham S, Welch A, et al. EPIC Norfolk: Study design and  
395 characteristics of the cohort. *Br J Cancer* 1999;80(Supplement 1):95-103.
- 396 12. Khaw K-T, Jakes R, Bingham S, Welch A, Luben R, Day N, et al. Work and leisure time physical activity  
397 assessed using a simple, pragmatic, validated questionnaire and incident cardiovascular disease and  
398 all-cause mortality in men and women: The European Prospective Investigation into Cancer in Norfolk  
399 prospective population study. *Int J Epidemiol* 2006;35(4):1034-43.
- 400 13. Wareham N, Jakes R, Rennie K, Mitchell J, Hennings S, Day N. Validity and repeatability of the EPIC-Norfolk  
401 Physical Activity Questionnaire. *Int J Epidemiol* 2002;31:168-74.
- 402 14. Bingham S, Gill C, Welch A, Cassidy A, Runswick S, al e. Validation of dietary assessment methods in the  
403 UK arm of EPIC using weighted records, and 24-hour urinary nitrogen and potassium and serum  
404 vitamin C and carotenoids as biomarkers. *Int J Epidemiol* 1997;26:S137-S51. .
- 405 15. Ainsworth BE, Haskell WL, Leon A, Jacobs DJ, Montoye H, Sallis J, et al. Compendium of physical activities:  
406 classification of energy costs of human physical activities. *Med Sci Sport Exer* 1993;25(10):1192.
- 407 16. Sahlqvist S, Heesch K. Characteristics of utility cyclists in Queensland, Australia: An examination of the  
408 association between individual, social and environmental factors and utility cycling. *J Phys Act Health*  
409 2012;9:818-28.
- 410 17. Winters M, Friesen MC, Koehoorn M, Teschke K. Utilitarian bicycling: A multilevel analysis of climate and  
411 personal influences. *Am J Prev Med* 2007;32(1):52-58.
- 412 18. Foster C, Panter J, Wareham N. Assessing the impact of road traffic on cycling for leisure and cycling to  
413 work. *Int J Behav Nutr Phys Act* 2011;8(1):61.
- 414 19. Pucher J, Buehler R. Making cycling irresistible: Lessons from The Netherlands, Denmark and Germany.  
415 *Transport Reviews* 2008;28(4):495-528.
- 416 20. Wagner A, Simon C, Evans A, Ferrières J, Montaye M, Ducimetière P, et al. Physical activity and coronary  
417 event incidence in Northern Ireland and France. *Circulation* 2002;105(19):2247-52.
- 418 21. Hamer M, Chida Y. Active commuting and cardiovascular risk: a meta-analytic review. *Prev Med* 2008;46:9-  
419 13.
- 420 22. Park S, Rink LD, Wallace JP. Accumulation of physical activity leads to a greater blood pressure reduction  
421 than a single continuous session, in prehypertension. *J Hyper* 2006;24:1761-70.
- 422 23. Altena TS, Michaelson JL, Ball SD, Thomas TR. Single sessions of intermittent and continuous exercise and  
423 postprandial lipemia. *Med Sci Sport Exer* 2004;36(8):1364-71.
- 424 24. Schnohr P, Marott JL, Jensen JS, Jensen GB. Intensity versus duration of cycling, impact on all-cause and  
425 coronary heart disease mortality: the Copenhagen City Heart Study. *Euro J Prev Cardiol* 2012;19(1):73-  
426 80.

1 427 25. Goodman A, Brand C, Ogilvie D. Associations of health, physical activity and weight status with motorised  
2 428 travel and transport carbon dioxide emissions: a cross-sectional, observational study. *Environ Health*  
3 429 2012;11(1):52.  
4  
5 430  
6  
7  
8  
9  
10  
11  
12  
13  
14  
15  
16  
17  
18  
19  
20  
21  
22  
23  
24  
25  
26  
27  
28  
29  
30  
31  
32  
33  
34  
35  
36  
37  
38  
39  
40  
41  
42  
43  
44  
45  
46  
47  
48  
49  
50  
51  
52  
53  
54  
55  
56  
57  
58  
59  
60

For peer review only



## 431 TABLES

432 **Table 1: Cycling exposure measures calculated from the EPAQ2 questionnaire administered at the**  
 433 **second health assessment**

| Exposure                             | Calculation                                                                                                                                                                                                                                                                                                                                                                                                                                                                                                                                                                                                                                                                                                                                                                                                                                                                                                                                                                                                                                                                                                           |
|--------------------------------------|-----------------------------------------------------------------------------------------------------------------------------------------------------------------------------------------------------------------------------------------------------------------------------------------------------------------------------------------------------------------------------------------------------------------------------------------------------------------------------------------------------------------------------------------------------------------------------------------------------------------------------------------------------------------------------------------------------------------------------------------------------------------------------------------------------------------------------------------------------------------------------------------------------------------------------------------------------------------------------------------------------------------------------------------------------------------------------------------------------------------------|
| <i>Commuter cycling</i>              | Respondents were asked how frequently they normally travelled to work by car, public transport, bike or on foot (response options were 'always', 'usually', 'occasionally' or 'never/rarely'). Responses were converted to fractions (always = 1, usually = 0.75, occasionally = 0.25, never / rarely = 0). Participants reported the distance between home and work and the average number of times per week they made this journey (multiplied by two to account for the return journey). When cycling was the only mode selected, total weekly distance cycled was calculated by multiplying the distance from home to work by the number of journeys made. When cycling was selected alongside other modes, the distance cycled was weighted according to the frequency of cycling relative to the frequency of the other modes reported. For example, if a respondent selected 'always' for both cycling and driving it was assumed that cycling accounted for 10%, and driving for 90% of the distance travelled. Total number of journeys was then multiplied by the weighted distance travelled (miles/week). |
| <i>Non-commuting utility cycling</i> | Respondents were asked to recall the average number of journeys they made by bicycle to get about apart from going to work for each of the following distances: 'less than 0.5 miles', '0.5 miles to 1.5 miles', '1.5 to 2.5 miles', '2.5 to 3.5 miles', '3.5 to 5.5 miles', and 'more than 5.5 miles'. Total weekly distance travelled was computed by multiplying the reported number of trips by the midpoint value of each distance category (assumed to be 0.25 for <0.5 miles and 6 for >5.5 miles). These values were then summed to provide a measure of distance travelled (miles/week).                                                                                                                                                                                                                                                                                                                                                                                                                                                                                                                     |
| <i>All utility cycling</i>           | Distance travelled for non-commuting utility cycling was added to distance travelled for commuting cycling to derive a measure of total utility cycling (miles/week).                                                                                                                                                                                                                                                                                                                                                                                                                                                                                                                                                                                                                                                                                                                                                                                                                                                                                                                                                 |
| <i>Recreational cycling</i>          | Respondents reported the average time spent 'cycling for pleasure' per session and the frequency of such sessions: 'none', 'less than once a month', 'once a month', 'two to three times a month', 'once a week', 'two to three times a week', 'four to five times a week', or 'everyday'. Average weekly cycling duration was computed by converting the frequency into a weekly numerical value (e.g. 0.5/52 for 'less than once a month' and (2.5*12)/52 for '2 to 3 times per month'). Time spent cycling (min/week) was computed by multiplying the average session duration by the average weekly frequency.                                                                                                                                                                                                                                                                                                                                                                                                                                                                                                    |
| <i>Total cycling</i>                 | To enable a measure of total cycling to be derived and to allow for comparisons with previous studies the distance travelled for utility cycling was converted into an estimated duration. Based on self-report data from a recent study of UK adults, we assumed an average cycling speed of 10 miles/hour. <sup>25</sup> A measure of total time spent cycling (min/week) was derived by summing time spent in commuting, other utility and recreational cycling.                                                                                                                                                                                                                                                                                                                                                                                                                                                                                                                                                                                                                                                   |

434

435

436 **Table 2: Descriptive characteristics of sample [N (%)] at first health assessment (n=22,450) by cycling**  
 437 **(yes, no)**

| Characteristic                     | 0 min/week: N<br>(column %) | ≥ 1 min/week: N<br>(column %) | OR for any cycling<br>(95%CI) <sup>a</sup> |
|------------------------------------|-----------------------------|-------------------------------|--------------------------------------------|
| Sex                                |                             |                               |                                            |
| Man                                | 3880 (66.9)                 | 1920 (72.0)                   | 1.0                                        |
| Woman                              | 5436 (33.1)                 | 2110 (28.0)                   | 0.92 (0.86, 0.98)                          |
| Age (yrs)                          |                             |                               |                                            |
| 40 – 55                            | 2096 (58.1)                 | 1498 (41.7)                   | 1.0                                        |
| 50 – 65                            | 3105 (67.4)                 | 1473 (32.2)                   | 0.72 (0.67, 0.78)                          |
| ≥65                                | 4115 (79.4)                 | 1059 (20.5)                   | 0.44 (0.40, 0.49)                          |
| Education Level                    |                             |                               |                                            |
| Degree or equivalent               | 1280 (65.6)                 | 670 (34.4)                    | 1.0                                        |
| 'A' Level or equivalent            | 3867 (69.2)                 | 1719 (30.8)                   | 0.91 (0.81, 1.02)                          |
| GCSE or equivalent                 | 1054 (71.0)                 | 431 (29.0)                    | 1.02 (0.95, 1.11)                          |
| No formal qualification            | 3115 (72.09)                | 1210 (28.0)                   | 1.29 (1.15, 1.44)                          |
| Social Class                       |                             |                               |                                            |
| Professional                       | 665 (66.4)                  | 336 (33.6)                    | 1.0                                        |
| Managerial / technical             | 5269 (71.8)                 | 2071 (28.2)                   | 0.90 (0.79, 1.02)                          |
| Skilled / partially skilled labour | 3078 (67.7)                 | 1469 (32.3)                   | 1.15 (1.00, 1.31)                          |
| Unskilled labour                   | 304 (66.4)                  | 154 (33.6)                    | 1.36 (1.08, 1.64)                          |
| Paid Employment                    |                             |                               |                                            |
| No                                 | 8578 (81.0)                 | 2080 (19.0)                   | 1.0                                        |
| Yes                                | 8365 (72.5)                 | 2127 (27.2)                   | 1.05 (0.97, 1.14)                          |

438 <sup>a</sup>Adjusted for all other variables in the table

439 OR = odds ratio, CI = 95% confidence interval

440

Table 3: Prospective associations over 15 years between total cycling and mortality (all-cause, cardiovascular and cancer) in 22,450 participants

| Total cycling             | FU yrs<br>Mean<br>(SD) | All-cause mortality |                      |                      | Cardiovascular mortality |                      |                      | Cancer mortality |                      |                      |
|---------------------------|------------------------|---------------------|----------------------|----------------------|--------------------------|----------------------|----------------------|------------------|----------------------|----------------------|
|                           |                        | Events<br>N (%)     | Hazard Ratio (95%CI) |                      | Events<br>N (%)          | Hazard Ratio (95%CI) |                      | Events<br>N (%)  | Hazard Ratio (95%CI) |                      |
|                           |                        |                     | Model A <sup>a</sup> | Model B <sup>b</sup> |                          | Model A <sup>a</sup> | Model B <sup>b</sup> |                  | Model A <sup>a</sup> | Model B <sup>b</sup> |
| 0 min/week                | 15.2<br>(3.4)          | 3,686<br>(21.3)     | 1                    | 1                    | 1179<br>(6.8)            | 1                    | 1                    | 1352<br>(7.8)    | 1                    | 1                    |
| 1 – 59 min/week           | 15.7<br>(2.6)          | 100<br>(10.8)       | 0.86 (0.71, 1.07)    | 0.96 (0.78, 1.17)    | 25<br>(2.7)              | 0.73 (0.49, 1.08)    | 0.83 (0.56, 1.24)    | 44<br>(4.7)      | 0.91 (0.68, 1.24)    | 0.99 (0.73, 1.34)    |
| ≥60 min/week              | 15.7<br>(3.0)          | 612<br>(14.3)       | 0.86 (0.79, 0.94)**  | 0.91 (0.84, 0.99)*   | 179<br>(4.2)             | 0.81 (0.69, 0.95)*   | 0.87 (0.74, 1.02)*   | 252<br>(5.9)     | 0.89 (0.77, 1.01)    | 0.93 (0.81, 1.06)    |
| <i>p</i> for linear trend |                        |                     | 0.02                 | 0.06                 |                          | 0.04                 | 0.09                 |                  | 0.20                 | 0.23                 |

\**p* < .05, \*\**p* < .01, \*\*\**p* < .001; 95% CI: 95% confidence interval; FU: follow-up

<sup>a</sup>Adjusted for age, sex, education level and social class

<sup>b</sup>Further adjusted for smoking status, family history of cancer or cardiovascular disease, and other physical activity (walking and other exercise)

Table 4: Prospective association over 11.5 years between cycling (total and domain specific) and mortality (all-cause, cardiovascular and cancer) in 13,346 participants

|                                         | FU yrs<br>Mean<br>(SD) | All-cause mortality |                      |                      | Cardiovascular mortality |                      |                      | Cancer mortality |                      |                      |
|-----------------------------------------|------------------------|---------------------|----------------------|----------------------|--------------------------|----------------------|----------------------|------------------|----------------------|----------------------|
|                                         |                        | Events<br>N (%)     | Hazard Ratio (95%CI) |                      | Events<br>N (%)          | Hazard Ratio (95%CI) |                      | Events<br>N (%)  | Hazard Ratio (95%CI) |                      |
|                                         |                        |                     | Model A <sup>a</sup> | Model B <sup>b</sup> |                          | Model A <sup>a</sup> | Model B <sup>b</sup> |                  | Model A <sup>a</sup> | Model B <sup>b</sup> |
| <b>Commuting</b>                        |                        |                     |                      |                      |                          |                      |                      |                  |                      |                      |
| 0 miles/week<br>(0 min/week)            | 11.1<br>(2.0)          | 1630<br>(13.1)      | 1                    | 1                    | 474<br>(3.8)             | 1                    | 1                    | 679<br>(5.4)     | 1                    | 1                    |
| 0.01-9.99 miles/week<br>(1-59 min/week) | 11.5<br>(1.6)          | 29<br>(4.9)         | 0.87 (0.60, 1.26)    | 0.96 (0.66, 1.39)    | 9<br>(1.5)               | 1.09 (0.56, 2.13)    | 1.23 (0.63, 2.40)    | 16<br>(2.7)      | 0.90 (0.55, 1.49)    | 0.95 (0.57, 1.57)    |
| ≥10 miles/week<br>(≥60 min/week)        | 11.5<br>(1.4)          | 11<br>(4.0)         | 0.80 (0.44, 1.46)    | 0.91 (0.50, 1.65)    | 2<br>(0.7)               | 0.61 (0.15, 2.47)    | 0.71 (0.18, 2.90)    | 5<br>(1.8)       | 0.66 (0.27, 1.59)    | 0.68 (0.28, 1.66)    |
| <i>p</i> for linear trend               |                        |                     | 0.42                 | 0.74                 |                          | 1.00                 | 0.72                 |                  | 0.28                 | 0.34                 |
| <b>All Utility</b>                      |                        |                     |                      |                      |                          |                      |                      |                  |                      |                      |
| 0 miles/week<br>(0 min/week)            | 11.1<br>(2.0)          | 1383<br>(13.2)      | 1                    | 1                    | 392<br>(3.8)             | 1                    | 1                    | 580<br>(5.5)     | 1                    | 1                    |
| 0.01-9.99 miles/week<br>(1-59 min/week) | 11.6<br>(1.8)          | 233<br>(10.4)       | 0.90 (0.78, 1.04)    | 0.95 (0.83, 1.09)    | 75<br>(3.4)              | 1.04 (0.81, 1.34)    | 1.10 (0.85, 1.41)    | 97<br>(4.3)      | 0.85 (0.69, 1.06)    | 0.90 (0.72, 1.11)    |
| ≥10 miles/week<br>(≥60 min/week)        | 11.4<br>(1.8)          | 54<br>(8.4)         | 1.01 (0.77, 1.33)    | 1.10 (0.83, 1.44)    | 18<br>(2.8)              | 1.30 (0.81, 2.10)    | 1.44 (0.89, 2.31)    | 23<br>(3.6)      | 0.89 (0.58, 1.35)    | 0.92 (0.61, 1.41)    |
| <i>p</i> for linear trend               |                        |                     | 0.71                 | 0.33                 |                          | 0.81                 | 0.52                 |                  | 0.94                 | 0.89                 |
| <b>Recreational</b>                     |                        |                     |                      |                      |                          |                      |                      |                  |                      |                      |
| 0 min/week                              | 11.1<br>(2.1)          | 1483<br>(13.7)      | 1                    | 1                    | 438<br>(4.0)             | 1                    | 1                    | 608<br>(5.6)     | 1                    | 1                    |
| 1 – 59 min/week                         | 11.4<br>(1.5)          | 104<br>(5.9)        | 0.81 (0.66, 0.99)*   | 0.87 (0.69, 1.04)    | 25<br>(1.4)              | 0.72 (0.48, 1.09)    | 0.75 (0.50, 1.13)    | 56<br>(3.2)      | 0.90 (0.68, 1.19)    | 0.95 (0.71, 1.25)    |
| ≥60 min/week                            | 11.3<br>(1.8)          | 83<br>(11.1)        | 1.13 (0.90, 1.41)    | 1.25 (0.99, 1.55)    | 22<br>(3.0)              | 1.07 (0.69, 1.65)    | 1.19 (0.77, 1.84)    | 36<br>(4.8)      | 1.06 (0.75, 1.49)    | 1.12 (0.80, 1.58)    |
| <i>p</i> for linear trend               |                        |                     | 0.12                 | 0.05                 |                          | 0.48                 | 0.32                 |                  | 0.46                 | 0.35                 |
| <b>Total cycling</b>                    |                        |                     |                      |                      |                          |                      |                      |                  |                      |                      |
| 0 min/week                              | 11.1<br>(2.1)          | 1308<br>(14.0)      | 1                    | 1                    | 379<br>(4.1)             | 1                    | 1                    | 540<br>(5.8)     | 1                    | 1                    |
| 1 – 59 min/week                         | 11.5<br>(1.8)          | 236<br>(8.9)        | 0.87 (0.76, 1.00)*   | 0.90 (0.79, 1.04)    | 72<br>(2.7)              | 0.95 (0.74, 1.23)    | 0.99 (0.76, 1.23)    | 105<br>(4.0)     | 0.86 (0.70, 1.06)    | 0.90 (0.73, 1.11)    |
| ≥60 min/week                            | 11.4<br>(1.7)          | 126<br>(9.2)        | 1.00 (0.83, 1.21)    | 1.11 (0.91, 1.32)    | 34<br>(2.5)              | 1.00 (0.70, 1.43)    | 1.10 (0.77, 1.57)    | 55<br>(4.0)      | 0.92 (0.69, 1.22)    | 0.98 (0.74, 1.30)    |
| <i>p</i> for linear trend               |                        |                     | 0.08                 | 0.26                 |                          | 0.36                 | 0.18                 |                  | 0.81                 | 0.51                 |

39 \**p* < .05, \*\**p* < .01, \*\*\**p* < .001; 95% CI: 95% confidence interval; FU: follow-up

40 <sup>a</sup>Adjusted for age, sex, education level and social class

41 <sup>b</sup>Further adjusted for smoking status, family history of cancer or cardiovascular disease, and all other physical activity

Table 5: Associations between time spent cycling (total and sub domains; min/week) and physical activity (MET.hr/week) in 13,346 participants

|                                      | N     | Leisure Time PA <sup>a</sup> (MET.hr/week) |                                              | Total MVPA <sup>b</sup> (MET.hr/week) |                                              | Total PA <sup>c</sup> (MET.hr/week) |                                              |
|--------------------------------------|-------|--------------------------------------------|----------------------------------------------|---------------------------------------|----------------------------------------------|-------------------------------------|----------------------------------------------|
|                                      |       | Mean (SD)                                  | Regression coefficient (95% CI) <sup>d</sup> | Mean (SD)                             | Regression coefficient (95% CI) <sup>d</sup> | Mean (SD)                           | Regression coefficient (95% CI) <sup>d</sup> |
| Commuter cycling                     |       |                                            |                                              |                                       |                                              |                                     |                                              |
| 0 miles/week (0 min/week)            | 12484 | 39.4 (37.7)                                | 0                                            | 61.9 (52.3)                           | 0                                            | 82.1 (44.6)                         | 0                                            |
| 0.01-9.99 miles/week (1-59 min/week) | 587   | 35.3 (32.4)                                | -1.6 (-4.7, 1.4)                             | 82.4 (58.0)                           | 12.2 (8.2, 16.2)***                          | 104.9 (46.8)                        | 11.8 (8.3, 15.3)***                          |
| ≥10 miles/week (≥60 min/week)        | 275   | 42.9 (37.6)                                | 1.9 (-2.5, 6.3)                              | 116.6 (63.0)                          | 35.3 (29.5, 41.0)***                         | 128.6 (49.2)                        | 29.7 (24.7, 34.7)***                         |
| All utility cycling                  |       |                                            |                                              |                                       |                                              |                                     |                                              |
| 0 miles/week (0 min/week)            | 10462 | 38.2 (37.1)                                | 0                                            | 60.5 (51.7)                           | 0                                            | 81.2 (44.2)                         | 0                                            |
| 0.01-9.99 miles/week (1-59 min/week) | 2237  | 42.9 (38.5)                                | 3.7 (2.1, 5.4)***                            | 69.6 (55.4)                           | 5.5 (3.3, 7.7)***                            | 89.2 (46.9)                         | 4.4 (2.5, 6.3)***                            |
| ≥10 miles/week (≥60 min/week)        | 647   | 46.7 (39.3)                                | 6.9 (3.9, 9.8)***                            | 99.0 (60.4)                           | 25.0 (21.2, 28.9)***                         | 112.1 (50.0)                        | 20.2 (16.9, 23.6)***                         |
| Leisure-time cycling                 |       |                                            |                                              |                                       |                                              |                                     |                                              |
| 0 min/week                           | 10843 | 37.3 (36.5)                                | 0                                            | 60.0 (51.7)                           | 0                                            | 80.5 (44.1)                         | 0                                            |
| 1-59 min/week                        | 1756  | 41.0 (35.4)                                | 4.2 (2.3, 6.1)***                            | 73.8 (53.9)                           | 4.7 (2.3, 7.2)***                            | 95.3 (45.3)                         | 4.9 (2.8, 7.0)***                            |
| ≥60 min/week                         | 747   | 64.6 (46.6)                                | 25.6 (22.9, 28.2)***                         | 98.0 (61.5)                           | 27.4 (23.9, 31.0)***                         | 110.2 (52.5)                        | 21.9 (18.9, 25.0)***                         |
| Total cycling                        |       |                                            |                                              |                                       |                                              |                                     |                                              |
| 0 min/week                           | 9316  | 37.2 (36.6)                                | 0                                            | 58.5 (50.8)                           | 0                                            | 79.3 (43.6)                         | 0                                            |
| 1-59 min/week                        | 2654  | 39.7 (35.8)                                | 3.2 (1.6, 4.9)***                            | 67.0 (53.1)                           | 2.9 (0.8, 5.0)*                              | 88.3 (45.0)                         | 2.6 (0.8, 4.4)*                              |
| ≥60 min/week                         | 1376  | 52.4 (43.6)                                | 14.2 (12.2, 16.3)***                         | 94.4 (60.5)                           | 24.1 (21.3, 26.8)***                         | 108.7 (50.7)                        | 19.5 (17.1, 21.8)***                         |

\*p &lt; .05, \*\*p &lt; .01, \*\*\*p &lt; .001

SD: standard deviation; 95% CI: 95% confidence interval; MVPA: moderate-to-vigorous physical activity; PA: physical activity

<sup>a</sup>Computed as the sum of all moderate-to-vigorous leisure-time physical activity<sup>b</sup>Computed as the sum of all moderate-to-vigorous physical activity across all domains (leisure-time, household, work, commute)<sup>c</sup>Computed as the sum of all light and moderate-to-vigorous physical activity across all domains (leisure-time, household, work, commute)<sup>d</sup>Adjusted for age, sex, education and social class

1  
2  
3 **Appendix Part 1**  
4  
5

6 **Physical Activity Questions at First Health Assessment**  
7

8 In a typical week during the past 12 months, how many hours did you spend on each of the following  
9 activities? (Put '0' if none)  
10

11 Walking, including walking to work and during leisure time

12 In summer \_\_\_ hours per week

13 In winter \_\_\_ hours per week  
14  
15

16 Cycling, including cycling to work and during leisure time

17 In summer \_\_\_ hours per week

18 In winter \_\_\_ hours per week  
19

20 Other physical exercise such as keep fit, aerobics, swimming, jogging

21 In summer \_\_\_ hours per week

22 In winter \_\_\_ hours per week  
23  
24  
25  
26  
27  
28  
29  
30  
31  
32  
33  
34  
35  
36  
37  
38  
39  
40  
41  
42  
43  
44  
45  
46  
47  
48  
49  
50  
51  
52  
53  
54  
55  
56  
57  
58  
59  
60



## Appendix Part 2

Table A1: Baseline characteristics (first health assessment) of the cohort (n=22,450) by all- cause, cardiovascular and cancer mortality outcomes; values are mean (SD) unless otherwise indicated

| Baseline Characteristics           | All-cause mortality  |                        | Cardiovascular mortality |                       | Cancer mortality     |                       |
|------------------------------------|----------------------|------------------------|--------------------------|-----------------------|----------------------|-----------------------|
|                                    | Deceased<br>(n=4380) | Survivor<br>(n=18,070) | Deceased<br>(n=1379)     | Survivor<br>(n=21071) | Deceased<br>(n=1639) | Survivor<br>(n=20811) |
| Follow-up years                    | 10.5 (4.6)           | 16.5 (1.3)***          | 10.2 (4.7)               | 15.7 (2.9)***         | 10.0 (4.4)           | 15.8 (2.8)***         |
| Male, N (%)                        | 2395 (54.7)          | 7746 (42.9)***         | 782 (56.7)               | 9359 (44.4)***        | 914 (55.8)           | 9227 (44.3)***        |
| Age (years)                        | 66.1 (7.7)           | 56.1 (8.5)***          | 67.7 (6.7)               | 57.5 (9.0)***         | 63.6 (8.2)           | 57.6 (9.2)***         |
| Education Level, N (%)             |                      |                        |                          |                       |                      |                       |
| No formal qualification            | 2049 (46.8)          | 5957 (33.0)            | 671 (48.7)               | 7335 (34.8)           | 695 (42.4)           | 7311 (35.1)           |
| GCSE or equivalent                 | 353 (8.1)            | 2017 (11.2)            | 105 (7.6)                | 2265 (10.8)           | 148 (9.0)            | 2222 (10.7)           |
| A-Level or equivalent              | 1617 (36.9)          | 7511 (41.6)            | 495 (35.9)               | 8633 (41.0)           | 654 (39.9)           | 8474 (40.7)           |
| Degree or equivalent               | 361 (8.2)            | 2585 (14.3)***         | 108 (7.8)                | 2838 (13.5)***        | 8.7 (142)            | 2804 (13.5)***        |
| Social class, N (%)                |                      |                        |                          |                       |                      |                       |
| Professional                       | 220 (5.0)            | 1354 (7.5)             | 77 (5.6)                 | 1497 (7.1)            | 79 (4.8)             | 1495 (7.2)            |
| Managerial / technical             | 2310 (52.7)          | 9570 (53.0)            | 719 (52.1)               | 11161 (53.0)          | 834 (50.9)           | 54.1 (11046)          |
| Skilled / partially skilled labour | 1642 (37.5)          | 6568 (36.4)            | 502 (36.4)               | 7708 (36.6)           | 648 (39.5)           | 7562 (36.3)           |
| Unskilled labour                   | 208 (4.8)            | 578 (3.2)***           | 81 (5.9)                 | 705 (3.4)***          | 78 (4.8)             | 708 (3.4)***          |
| Family history of CVD, N (%)       | 2257 (51.5)          | 2123 (50.2)            | 756 (54.8)               | 10570 (50.2)**        | 797 (48.6)           | 10529 (50.6)          |
| Family history of cancer, N (%)    | 1706 (39.0)          | 7039 (39.0)            | 901 (65.3)               | 12799 (60.8)**        | 709 (43.3)           | 38.6 (8036)***        |
| Smoking Status, N (%)              |                      |                        |                          |                       |                      |                       |
| Current                            | 651 (14.9)           | 1991 (11.0)            | 205 (14.9)               | 2437 (11.6)           | 281 (17.1)           | 2361 (11.3)           |
| Former                             | 2181 (49.8)          | 7137 (39.5)            | 706 (51.2)               | 8612 (40.9)           | 802 (48.9)           | 8516 (40.9)           |
| Never                              | 1548 (35.3)          | 8942 (49.5)***         | 468 (33.9)               | 10022 (47.6)***       | 556 (33.9)           | 9934 (47.7)***        |
| Hypertensive Medication (yes)      | 1278 (29.2)          | 2396 (13.3)***         | 517 (37.5)               | 3157 (15.0)**         | 360 (22.0)           | 11279 (78.0)***       |
| Lipid Medication (yes)             | 58 (1.6)             | 191 (1.1)              | 28 (2.0)                 | 221 (1.1)**           | 15 (0.9)             | 234 (1.1)             |
| Total energy intake (kj/day)       | 8736.4 (2527.9)      | 8611.4 (2513.5)**      | 8744.4 (2547.8)          | 8628.5 (2514.6)       | 8809.5 (2552.9)      | 8621.9 (2513.4)**     |
| Units of alcohol (units/wk)        | 7.1 (10.6)           | 7.2 (9.2)              | 6.7 (10.0)               | 7.2 (9.5)*            | 8.0 (11.5)           | 7.1 (7.0)             |

\*p &lt; 0.05; \*\*p &lt; 0.005; \*\*\*p &lt; 0.001

Table A2: Descriptive characteristics of participants [N (%)] at second health assessment (n=13346) by cycling (yes, no)

| Baseline Characteristics           | Commuter Cycling |              |                   | All Utility Cycling |             |                   | Leisure-time Cycling |             |                   |
|------------------------------------|------------------|--------------|-------------------|---------------------|-------------|-------------------|----------------------|-------------|-------------------|
|                                    | None             | Some         | OR (95% CI)       | None                | Some        | OR (95% CI)       | None                 | Some        | OR (95% CI)       |
| Sex                                |                  |              |                   |                     |             |                   |                      |             |                   |
| Male                               | 5395 (93.0)      | 405 (7.0)    | 1                 | 4424 (76.3)         | 1376 (23.7) | 1                 | 4555 (78.5)          | 1245 (21.5) | 1                 |
| Female                             | 7089 (93.9)      | 457 (6.1)    | 0.77 (0.66, 0.89) | 6038 (80.19)        | 1508 (20.0) | 0.83 (0.76, 0.91) | 5858 (83.3)          | 1258 (16.7) | 0.63 (0.56, 0.70) |
| Age (yrs)                          |                  |              |                   |                     |             |                   |                      |             |                   |
| 40 – 54                            | 3138 (87.3)      | 456 (12.7)   | 1                 | 2624 (73.07)        | 970 (27.0)  | 1                 | 2534 (70.5)          | 1060 (29.5) | 1                 |
| 55 – 64                            | 4253 (92.9)      | 325 (7.1)    | 0.50 (0.42, 0.58) | 3524 (77.0)         | 1054 (23.0) | 0.94 (0.84, 1.04) | 3651 (79.8)          | 927 (20.3)  | 0.63 (0.25, 0.34) |
| ≥65                                | 5093 (98.4)      | 81 (1.6)     | 0.10 (0.08, 0.13) | 4314 (83.4)         | 860 (16.6)  | 0.90 (0.79, 1.03) | 4658 (90.0)          | 516 (10.0)  | 0.29 (0.25, 0.34) |
| Education Level                    |                  |              |                   |                     |             |                   |                      |             |                   |
| Degree or equivalent               | 1807 (92.7)      | 143 (7.3)    | 1                 | 1487 (76.3)         | 463 (23.7)  | 1                 | 1493 (76.6)          | 457 (23.4)  | 1                 |
| A-Level or equivalent              | 5237 (93.8)      | 349 (6.3)    | 0.81 (0.66, 1.00) | 4404 (78.8)         | 1182 (21.2) | 0.90 (0.79, 1.03) | 4440 (79.5)          | 1146 (20.5) | 0.94 (0.82, 1.07) |
| GCSE or equivalent                 | 1394 (93.9)      | 91 (6.1)     | 0.78 (0.59, 1.00) | 1196 (80.5)         | 289 (19.5)  | 0.82 (0.69, 0.98) | 1196 (80.5)          | 289 (19.5)  | 0.86 (0.72, 1.03) |
| No formal qualification            | 4046 (93.6)      | 279 (6.5)    | 1.01 (0.79, 1.29) | 3375 (78.0)         | 950 (22.0)  | 1.05 (0.91, 1.22) | 3714 (85.9)          | 611 (14.1)  | 0.75 (0.64, 0.88) |
| Social Class                       |                  |              |                   |                     |             |                   |                      |             |                   |
| Professional                       | 932 (93.1)       | 69 (6.9)     | 1                 | 764 (76.3)          | 237 (23.7)  | 1                 | 775 (77.4)           | 226 (22.6)  | 1                 |
| Managerial / technical             | 6990 (95.2)      | 350 (4.8)    | 0.72 (0.54, 0.95) | 5927 (80.8)         | 1413 (19.3) | 0.78 (0.66, 0.93) | 5973 (81.4)          | 1357 (18.6) | 0.85 (0.72, 1.05) |
| Skilled / partially skilled labour | 4147 (91.2)      | 400 (8.8)    | 1.36 (1.01, 1.82) | 3438 (75.6)         | 1109 (24.4) | 1.03 (0.87, 1.23) | 3708 (81.6)          | 839 (18.5)  | 0.86 (0.72, 1.04) |
| Unskilled labour                   | 415 (90.6)       | 43 (9.4)     | 1.60 (1.05, 2.45) | 333 (72.7)          | 125 (27.3)  | 1.25 (0.96, 1.63) | 387 (84.5)           | 71 (15.5)   | 0.79 (0.58, 1.08) |
| Paid Employment                    |                  |              |                   |                     |             |                   |                      |             |                   |
| Yes                                | 6306 (88.0)      | 6178 (100.0) | n/a               | 5148 (71.8)         | 2020 (28.2) | 1                 | 5118 (76.0)          | 1617 (24.0) | 1                 |
| No                                 | 862 (12.0)       | 0 (0)        |                   | 5314 (86.0)         | 864 (14.0)  | 2.33 (2.09, 2.60) | 5037 (86.9)          | 757 (13.1)  | 1.14 (1.02, 1.28) |

Table A3: Associations between demographic characteristics of participants at the first health assessment (n=22,450) and all-cause, cardiovascular disease and cancer mortality

| Demographic characteristics |                                    | N (%)         | All-cause mortality |                              | CVD mortality |                              | Cancer mortality |                              |
|-----------------------------|------------------------------------|---------------|---------------------|------------------------------|---------------|------------------------------|------------------|------------------------------|
|                             |                                    |               | No. deaths          | Crude mortality rate (95%CI) | No. deaths    | Crude mortality rate (95%CI) | No. deaths       | Crude mortality rate (95%CI) |
| Sex                         | Male                               | 10,141 (45.2) | 2395                | 1.0                          | 782           | 1.0                          | 914              | 1.0                          |
|                             | Female                             | 12,309 (54.8) | 1985                | 0.62 (0.58, 0.66)            | 597           | 0.61 (0.55, 0.68)            | 725              | 0.63 (0.57, 0.70)            |
| Age (years)                 | 40 – 54                            | 9043 (40.3)   | 462                 | 1.0                          | 90            | 1.0                          | 270              | 1.0                          |
|                             | 55 – 64                            | 6936 (30.9)   | 1044                | 3.29 (2.94, 3.7)             | 249           | 3.7 (2.9, 4.7)               | 537              | 2.7 (2.3, 3.2)               |
|                             | ≥65                                | 6471 (28.8)   | 2874                | 14.8 (13.4, 16.5)            | 1040          | 19.0 (15.3, 23.7)            | 832              | 4.8 (4.2, 5.5)               |
| Education Level             | Degree or equivalent               | 8006 (35.7)   | 8006                | 1.0                          | 671           | 1.0                          | 695              | 1.0                          |
|                             | A-level                            | 2370 (10.6)   | 2370                | 0.51 (0.45, 0.58)            | 105           | 0.51 (0.41, 0.63)            | 148              | 0.70 (0.58, 0.84)            |
|                             | GCSE                               | 9128 (40.7)   | 9128                | 0.63 (0.58, 0.67)            | 495           | 0.63 (0.56, 0.71)            | 654              | 0.81 (0.73, 0.91)            |
|                             | No formal qualification            | 2946 (13.1)   | 2946                | 0.41 (0.36, 0.46)            | 108           | 0.42 (0.34, 0.10)            | 142              | 0.53 (0.44, 0.64)            |
| Social Class                | Professional                       | 1574 (7.0)    | 220                 | 1.0                          | 77            | 1.0                          | 79               | 1.0                          |
|                             | Managerial / technical             | 11880 (52.9)  | 2310                | 1.49 (1.28, 1.73)            | 719           | 1.25 (0.98, 1.59)            | 834              | 1.42 (1.13, 1.81)            |
|                             | Skilled / partially skilled labour | 8210 (36.6)   | 1642                | 1.54 (1.32, 1.79)            | 502           | 1.27 (0.99, 1.62)            | 648              | 1.62 (1.28, 2.06)            |
|                             | Unskilled labour                   | 786 (3.5)     | 208                 | 2.21 (1.79, 2.74)            | 81            | 2.23 (1.61, 3.09)            | 78               | 2.08 (1.51, 2.89)            |
| Paid employment             | No                                 | 10958 (48.8)  | 3421                | 1.0                          | 1161          | 1.0                          | 1125             | 1.0                          |
|                             | Yes                                | 11492 (51.2)  | 959                 | 0.20 (0.19, 0.22)            | 218           | 0.16 (0.14, 0.19)            | 514              | 0.41 (0.37-0.46)             |

\*p &lt; .05, \*\*p &lt; .01, \*\*\*p &lt; .001

CVD: Cardiovascular disease; 95% CI: 95% Confidence intervals

STROBE 2007 (v4) Statement—Checklist of items that should be included in reports of cohort studies

| Section/Topic             | Item # | Recommendation                                                                                                                                                                       | Reported on page # |
|---------------------------|--------|--------------------------------------------------------------------------------------------------------------------------------------------------------------------------------------|--------------------|
| Title and abstract        | 1      | (a) Indicate the study’s design with a commonly used term in the title or the abstract                                                                                               | 1                  |
|                           |        | (b) Provide in the abstract an informative and balanced summary of what was done and what was found                                                                                  | 2                  |
| <b>Introduction</b>       |        |                                                                                                                                                                                      |                    |
| Background/rationale      | 2      | Explain the scientific background and rationale for the investigation being reported                                                                                                 | 4                  |
| Objectives                | 3      | State specific objectives, including any prespecified hypotheses                                                                                                                     | 4                  |
| <b>Methods</b>            |        |                                                                                                                                                                                      |                    |
| Study design              | 4      | Present key elements of study design early in the paper                                                                                                                              | 5                  |
| Setting                   | 5      | Describe the setting, locations, and relevant dates, including periods of recruitment, exposure, follow-up, and data collection                                                      | 5                  |
| Participants              | 6      | (a) Give the eligibility criteria, and the sources and methods of selection of participants. Describe methods of follow-up                                                           | 5                  |
|                           |        | (b) For matched studies, give matching criteria and number of exposed and unexposed                                                                                                  | n/a                |
| Variables                 | 7      | Clearly define all outcomes, exposures, predictors, potential confounders, and effect modifiers. Give diagnostic criteria, if applicable                                             | 5-6, 13            |
| Data sources/ measurement | 8*     | For each variable of interest, give sources of data and details of methods of assessment (measurement). Describe comparability of assessment methods if there is more than one group | 5-6, 13            |
| Bias                      | 9      | Describe any efforts to address potential sources of bias                                                                                                                            | 5-6                |
| Study size                | 10     | Explain how the study size was arrived at                                                                                                                                            | 5                  |
| Quantitative variables    | 11     | Explain how quantitative variables were handled in the analyses. If applicable, describe which groupings were chosen and why                                                         | 6-7                |
| Statistical methods       | 12     | (a) Describe all statistical methods, including those used to control for confounding                                                                                                | 6-7                |
|                           |        | (b) Describe any methods used to examine subgroups and interactions                                                                                                                  | n/a                |
|                           |        | (c) Explain how missing data were addressed                                                                                                                                          | 5                  |
|                           |        | (d) If applicable, explain how loss to follow-up was addressed                                                                                                                       | n/a                |
|                           |        | (e) Describe any sensitivity analyses                                                                                                                                                | 6-7                |
| <b>Results</b>            |        |                                                                                                                                                                                      |                    |

1  
2  
3  
4  
5  
6  
7  
8  
9  
10  
11  
12  
13  
14  
15  
16  
17  
18  
19  
20  
21  
22  
23  
24  
25  
26  
27  
28  
29  
30  
31  
32  
33  
34  
35  
36  
37  
38  
39  
40  
41  
42  
43  
44  
45  
46  
47  
48  
49

|                          |     |                                                                                                                                                                                                              |          |
|--------------------------|-----|--------------------------------------------------------------------------------------------------------------------------------------------------------------------------------------------------------------|----------|
| Participants             | 13* | (a) Report numbers of individuals at each stage of study—eg numbers potentially eligible, examined for eligibility, confirmed eligible, included in the study, completing follow-up, and analysed            | 5        |
|                          |     | (b) Give reasons for non-participation at each stage                                                                                                                                                         | 5        |
|                          |     | (c) Consider use of a flow diagram                                                                                                                                                                           | n/a      |
| Descriptive data         | 14* | (a) Give characteristics of study participants (eg demographic, clinical, social) and information on exposures and potential confounders                                                                     | 5, 7, 14 |
|                          |     | (b) Indicate number of participants with missing data for each variable of interest                                                                                                                          | 5        |
|                          |     | (c) Summarise follow-up time (eg, average and total amount)                                                                                                                                                  | 5        |
| Outcome data             | 15* | Report numbers of outcome events or summary measures over time                                                                                                                                               | 6        |
| Main results             | 16  | (a) Give unadjusted estimates and, if applicable, confounder-adjusted estimates and their precision (eg, 95% confidence interval). Make clear which confounders were adjusted for and why they were included | 15, 16   |
|                          |     | (b) Report category boundaries when continuous variables were categorized                                                                                                                                    | n/a      |
|                          |     | (c) If relevant, consider translating estimates of relative risk into absolute risk for a meaningful time period                                                                                             | n/a      |
| Other analyses           | 17  | Report other analyses done—eg analyses of subgroups and interactions, and sensitivity analyses                                                                                                               | 7        |
| <b>Discussion</b>        |     |                                                                                                                                                                                                              |          |
| Key results              | 18  | Summarise key results with reference to study objectives                                                                                                                                                     | 8-9      |
| <b>Limitations</b>       |     |                                                                                                                                                                                                              |          |
| Interpretation           | 20  | Give a cautious overall interpretation of results considering objectives, limitations, multiplicity of analyses, results from similar studies, and other relevant evidence                                   | 9        |
| Generalisability         | 21  | Discuss the generalisability (external validity) of the study results                                                                                                                                        | 9        |
| <b>Other information</b> |     |                                                                                                                                                                                                              |          |
| Funding                  | 22  | Give the source of funding and the role of the funders for the present study and, if applicable, for the original study on which the present article is based                                                | 10       |

\*Give information separately for cases and controls in case-control studies and, if applicable, for exposed and unexposed groups in cohort and cross-sectional studies.

**Note:** An Explanation and Elaboration article discusses each checklist item and gives methodological background and published examples of transparent reporting. The STROBE checklist is best used in conjunction with this article (freely available on the Web sites of PLoS Medicine at <http://www.plosmedicine.org/>, Annals of Internal Medicine at <http://www.annals.org/>, and Epidemiology at <http://www.epidem.com/>). Information on the STROBE Initiative is available at [www.strobe-statement.org](http://www.strobe-statement.org).



**The association of cycling with all-cause, cardiovascular and cancer mortality: findings from the population based EPIC-Norfolk cohort**

|                                 |                                                                                                                                                                                                                                                                                                                                                                                                                                                                                                                                                                                                                                                                                                                                                                                                                                                   |
|---------------------------------|---------------------------------------------------------------------------------------------------------------------------------------------------------------------------------------------------------------------------------------------------------------------------------------------------------------------------------------------------------------------------------------------------------------------------------------------------------------------------------------------------------------------------------------------------------------------------------------------------------------------------------------------------------------------------------------------------------------------------------------------------------------------------------------------------------------------------------------------------|
| Journal:                        | <i>BMJ Open</i>                                                                                                                                                                                                                                                                                                                                                                                                                                                                                                                                                                                                                                                                                                                                                                                                                                   |
| Manuscript ID:                  | bmjopen-2013-003797.R1                                                                                                                                                                                                                                                                                                                                                                                                                                                                                                                                                                                                                                                                                                                                                                                                                            |
| Article Type:                   | Research                                                                                                                                                                                                                                                                                                                                                                                                                                                                                                                                                                                                                                                                                                                                                                                                                                          |
| Date Submitted by the Author:   | 09-Oct-2013                                                                                                                                                                                                                                                                                                                                                                                                                                                                                                                                                                                                                                                                                                                                                                                                                                       |
| Complete List of Authors:       | Sahlqvist, Shannon; Deakin University, Centre for Physical Activity and Nutrition Research (C-PAN); Institute of Public Health, UKCRC Centre for Diet and Activity Research<br>Goodman, Anna; London School of Hygiene and Tropical Medicine, Faculty of Epidemiology and Population Health<br>Simmons, Rebecca; Medical Research Council, Epidemiology Unit<br>Khaw, KayTee; University of Cambridge, Department of Gerontology in Clinical Medicine<br>Cavill, Nick; Cavill Associates,<br>Foster, Charles; University of Oxford, Department of Public Health<br>Luben, Robert; University of Cambridge, Department of Public Health and Primary Care, Institute of Public Health, School of Clinical Medicine<br>Wareham, Nicholas; Medical Research Council, Epidemiology Unit<br>Ogilvie, David; Medical Research Council, Epidemiology Unit |
| <b>Primary Subject Heading</b>: | Epidemiology                                                                                                                                                                                                                                                                                                                                                                                                                                                                                                                                                                                                                                                                                                                                                                                                                                      |
| Secondary Subject Heading:      | Epidemiology, Public health, Sports and exercise medicine                                                                                                                                                                                                                                                                                                                                                                                                                                                                                                                                                                                                                                                                                                                                                                                         |
| Keywords:                       | active travel, active commuting, physical activity                                                                                                                                                                                                                                                                                                                                                                                                                                                                                                                                                                                                                                                                                                                                                                                                |
|                                 |                                                                                                                                                                                                                                                                                                                                                                                                                                                                                                                                                                                                                                                                                                                                                                                                                                                   |

SCHOLARONE™  
Manuscripts



1 **The association of cycling with all-cause, cardiovascular and cancer mortality: findings from the**  
2 **population based EPIC-Norfolk cohort**

3  
4 Shannon Sahlqvist<sup>1,2,3</sup>, Anna Goodman<sup>2,4</sup>, Rebecca K. Simmons<sup>1</sup>, Kay-Tee Khaw<sup>5</sup>, Nick Cavill<sup>6,7</sup>, Charlie Foster<sup>7</sup>,  
5 Robert Luben<sup>8</sup>, Nicholas J. Wareham<sup>1,2</sup> & David Ogilvie<sup>1,2</sup>  
6

7 <sup>1</sup>Medical Research Council Epidemiology Unit, University of Cambridge, UK

8 <sup>2</sup>UKCRC Centre for Diet and Activity Research (CEDAR), University of Cambridge, UK

9 <sup>3</sup>Centre for Physical Activity and Nutrition Research (C-PAN), School of Exercise and Nutrition Sciences, Deakin  
10 University, Geelong, Australia

11 <sup>4</sup>Faculty of Epidemiology and Population Health, London School of Hygiene and Tropical Medicine, London, UK

12 <sup>5</sup>Department of Gerontology in Clinical Medicine, University of Cambridge, UK

13 <sup>6</sup>Cavill Associates, Stockport, UK

14 <sup>7</sup>British Heart Foundation Health Promotion Research Group, Nuffield Department of Population Health,  
15 University of Oxford, UK

16 <sup>8</sup>Department of Public Health and Primary Care, Institute of Public Health, University of Cambridge School of  
17 Clinical Medicine, Cambridge, UK  
18

19 Corresponding Author:

20 Shannon Sahlqvist

21 Centre for Physical Activity and Nutrition Research (C-PAN)

22 School of Exercise and Nutrition Sciences

23 Faculty of Health

24 Locked Bag 2000

25 Geelong Victoria 3220 Australia

26 Email: shannon.sahlqvist@deakin.edu.au

27 Telephone: 0061 3 9251 7782

28 Fax: 0061 2 5337 2211  
29

30 Word Count: 3770

31 Number of pages: 23

32 Numbers of tables: 5  
33

34  
35  
36  
37  
38  
39  
40  
41  
42  
43  
44  
45  
46  
47  
48  
49  
50  
51  
52  
53  
54  
55  
56  
57  
58  
59  
60

35 **ABSTRACT**

36 Objectives: To investigate associations between modest levels of total and domain-specific (commuting, other  
37 utility, recreational) cycling and mortality from all causes, cardiovascular disease and cancer.

38 Design: Population-based cohort study (EPIC-Norfolk).

39 Setting: Participants were recruited from general practices in the east of England and attended health  
40 examinations between 1993 and 1997 and again between 1998 and 2000. At the first health assessment,  
41 participants reported their average weekly duration of cycling for all purposes using a simple measure of physical  
42 activity. At the second health assessment, participants reported a more detailed breakdown of their weekly  
43 cycling behaviour using the EPAQ2 physical activity questionnaire.

44 Participants: Adults aged 40 – 79 years at the first health assessment.

45 Primary Outcome Measure: All participants were followed for mortality (all-cause, cardiovascular and cancer)  
46 until March 2011.

47 Results: There were 22,450 participants with complete data at the first health assessment, of whom 4,398 died  
48 during follow-up; and 13,346 participants with complete data at the second health assessment, of whom 1,670  
49 died during follow-up. Preliminary analyses using exposure data from the first health assessment showed that  
50 cycling for at least 60 min/week in total was associated with a 9% reduced risk of all-cause mortality (adjusted  
51 hazard ratio 0.91, 95%CI 0.84, 0.99). Using the more precise measures of cycling available from the second  
52 health assessment, all types of cycling were associated with greater total moderate-to-vigorous physical activity,  
53 however there was little evidence of an association between overall or domain-specific cycling and mortality.

54 Conclusions: Cycling, in particular for utility purposes, was associated with greater moderate-to-vigorous and  
55 total physical activity. While this study provides tentative evidence that modest levels of cycling may reduce the  
56 risk of mortality, further research is required to confirm how much cycling is sufficient to induce health benefits.

57 Keywords: active travel, physical activity, commuting

58 **ARTICLE SUMMARY**

## 59 Article Focus

60 Cycling, particularly for transport, is promoted as a way of increasing regular physical activity among adults.  
61 Longitudinal studies have demonstrated associations between utility cycling and reduced mortality. However,  
62 these associations have been reported only for the highest exposure groups reporting substantial volumes of  
63 cycling (i.e.  $\geq 180$  min/wk).

64 We examined associations between mortality and lower volumes of total, and domain-specific, cycling in a  
65 population of UK adults.

## 66 Key Message

67 In this population with relatively low levels of cycling, preliminary analyses using a single item to measure total  
68 cycling revealed that cycling for as little as 60 min/week in total was associated with a reduced risk of all-cause  
69 mortality.

70 By contrast, in more substantive analyses using a detailed breakdown of cycling behaviour, neither total nor  
71 domain-specific cycling were associated with a reduced risk of mortality.

72 Our results provide tentative support for the hypothesis that modest 'doses' of cycling *may* reduce mortality risk  
73 and do not suggest any evidence of an adverse effect. Given that we also demonstrated that cycling is  
74 associated with the accumulation of greater total physical activity these findings contribute to the growing  
75 environmental, social and public health case for promoting cycling in individuals and populations.

## 76 Strengths and Limitations of this Study

77 Strengths of this study include its prospective design, the inclusion of a large heterogeneous population of men  
78 and women and the long follow-up. Further, this study used detailed measures of cycling and overall physical  
79 activity to examine associations between the various domains of cycling and mortality.

80 Due to the low average levels of cycling we were not able to examine the specific effects of a higher 'dose' of  
81 cycling, and the analyses were underpowered to examine sex differences in the associations between cycling  
82 and mortality.

83

## 84 INTRODUCTION

85 Promoting cycling as an alternative to motorised transport would result in reduced carbon emissions, traffic  
86 congestion and noise pollution while providing people with an opportunity to integrate regular physical activity  
87 into their lives.<sup>1,2</sup> As such, there is increasing policy interest in quantifying the health benefits of cycling so that  
88 they can be accurately modelled in the economic appraisal of proposed policies and interventions in the transport  
89 and health sectors.<sup>3,4</sup> One such tool developed by the World Health Organisation (Health Economic Assessment  
90 Tool; HEAT) estimates the economic value of a reduction in mortality as a consequence of population increases  
91 in cycling.<sup>5</sup> It does so by assuming a linear dose-response relationship between cycling and mortality and that  
92 any increase in cycling is in addition to other physical activity.

93 HEAT model estimates are dependent on the use of a relative risk estimate from a single study of Danish adults.  
94 The study reported a 28% reduction in all-cause mortality in adults who cycled to and from work compared with  
95 those who did not, even after controlling for other physical activity.<sup>6</sup> Similarly, an inverse association between  
96 transport (utility) cycling more generally and all-cause and cancer mortality has been reported in a cohort of  
97 Chinese women.<sup>7</sup> These findings are likely to reflect, in part, the fact that utility cycling translates into greater  
98 overall physical activity.<sup>8,9</sup>

99 While these studies suggest substantial health benefit associated with utility cycling, an examination of the  
100 benefits of recreational cycling would also be valuable to enable more informed policy recommendations on  
101 which type of cycling to promote.

102 Furthermore, it is possible that the findings from these studies reflect, at least to some extent, residual  
103 confounding from 'other' physical activity. In particular, the Danish study controlled for recreational physical  
104 activity using responses to a single item which asked participants to select from one of four options ranging from  
105 'you are almost entirely sedentary or perform light physical activity less than two hours per week' to 'you perform  
106 highly vigorous physical activity more than four hours per week or regular exercise or competitive sports several  
107 times per week'.<sup>6</sup> The extent to which responses to this item were independent of those regarding commuter  
108 cycling was not reported.

109 In addition, in the two prior studies which reported associations between utility cycling and mortality, the time  
110 spent cycling for transport in the exposed groups was substantial, reflecting the relatively high levels of cycling in  
111 those countries. For example, in the Danish study, those who commuted by bike spent an average of 180  
112 min/week doing so.<sup>6</sup> In the study of Chinese women, 19% cycled for up to 3.4 Metabolic Equivalents  
113 (MET).hr/day while a further 5% cycled for greater than 3.5 MET.hr/day, equivalent to approximately 350  
114 min/week.<sup>7</sup> Few studies have examined associations between cycling and mortality in populations such as that of  
115 the UK, which have a low prevalence of utility cycling by international standards. One previous study of adults in  
116 the EPIC-Norfolk cohort found no significant association between commuter cycling and either cardiovascular or  
117 all-cause mortality.<sup>10</sup> These null findings may partly reflect the cut points used to define cycling categories: the  
118 cut point for the highest category was 30 min/week, which may be an insufficient 'dose' to induce health benefits.  
119 It is also possible that the relatively short duration of follow-up (seven years) and the small number of deaths in  
120 the cohort limited the power of the study to detect effects.

121 Building on these previous analyses of EPIC-Norfolk cohort data, this paper aims to investigate more  
122 comprehensively the mortality benefits of cycling. First, we use a simple pragmatic measure of physical activity to  
123 examine associations between total cycling and all-cause, cardiovascular and cancer mortality over 15 years.  
124 Second, using a more detailed, disaggregate measure of physical activity which provides more accurate  
125 estimates of domain-specific cycling (commuting, all utility, and recreational) for a subset of our sample, we  
126 explore whether this association is driven by particular domains of cycling (e.g. utility vs. recreational). Finally, to  
127 help explain any associations between domain-specific cycling and mortality, we examine associations between  
128 these domains of cycling and total physical activity.

129

**METHODS****Study design and participants**

This study uses data from the EPIC-Norfolk cohort, part of the 10-country collaborative European Prospective Investigation into Cancer and Nutrition study (EPIC). Between 1993 and 1997, 25,633 adults aged 40 – 79 years were recruited from general practices in the county of Norfolk in the east of England and attended a health examination. As part of this examination, participants completed a short physical activity questionnaire which asked about time spent walking and cycling for all purposes and time spent in other exercise.<sup>11</sup> Between January 1998 and October 2000, 15,519 (61%) of the original cohort attended a second health assessment, completing a more detailed questionnaire on recreational, occupational, utility and household physical activity (EPAQ2).<sup>12</sup>

Data from the first health assessment were used to examine the association between total cycling and cardiovascular disease, while data from the second were used to examine the association between the domains of cycling and cardiovascular disease. Full details of the study are reported elsewhere.<sup>13</sup>

Of the participants in the first health assessment, we excluded those with self-reported cardiovascular disease (n=1,102) or cancer (n=1,327) and those with missing data (n=784) leaving 22,450 for analysis.

Similarly, of those who returned for the second health assessment, we excluded those with self-reported cardiovascular disease (n=772) or cancer (n=1,115) and those with missing data (n=286), leaving 13,346 for analysis. All participants were followed up for mortality to 31 March 2011 (mean 15.3 years (SD=3.3) from first health assessment, mean 11.5 years (SD = 2.0) from second health assessment). The Norwich District Health Authority Ethics Committee approved the study design and all participants provided written informed consent.

**Health assessments**

At both health assessments participants reported their level of education (categorised as no formal qualification; GCSE or equivalent, i.e. exams normally taken at age 16; 'A' level or equivalent, i.e. exams normally taken at age 18; university degree or equivalent), paid employment status (yes, no), social class (categorised as professional, managerial/technical job, skilled/partially skilled labour, unskilled labour), smoking status (current, former, never), anti-hypertensive medication (yes, no), medication for dyslipidaemia (yes, no) and family history of cancer and cardiovascular disease (yes, no). History of myocardial infarction, stroke, and cancer were also reported. Total energy intake (kJ/day) and alcohol consumption (units/week) were derived from a validated 130-item semi-quantitative food-frequency questionnaire.<sup>14</sup>

**Measurement of physical activity at first health assessment**

Physical activity was assessed by asking participants to report, separately for winter and summer, the weekly time (in hours) spent walking and cycling (separately) to work and during leisure, and in other exercise.<sup>11</sup> Total cycling was calculated as the average weekly time spent in winter and summer (min/week). See Appendix, part 1.

**Measurement of physical activity at second health assessment**

Physical activity, including cycling, was assessed with the validated and reliable EPAQ2 questionnaire, which asks participants to recall their physical activity behaviour across the domains of household, work, recreation and commuting, over the past year.<sup>12</sup> Energy expenditure [MET.hr/week] was calculated using the physical activity compendium.<sup>15</sup> Following standard EPAQ2 data reduction rules we calculated four specific cycling measures explained in detail in Table 1. In addition, total moderate-to-vigorous physical activity was calculated as the sum of all moderate and vigorous physical activity across all domains (home, work, recreation and commuting; MET.hr/week) and recreational physical activity was computed as the sum of all moderate and vigorous activity done during recreation specifically (MET.hr/week). A copy of the questionnaire can be found at: <http://www.srl.cam.ac.uk/epic/questionnaires/epaq2/epaq2.pdf>.

1 173 [Insert Table 1 about here]

2  
3 174 **Cycling exposure**

4 175 Given the highly skewed nature of the cycling data and to allow for comparisons with previous studies, we  
5 176 created three categories of cycling exposure: 0 min/week, 1 – 59 min/week and  $\geq$  60 min/week. These represent  
6 177 levels of cycling which we believe are realistic to achieve in countries such as the UK, which currently have low  
7 178 levels of utility cycling. For our measures of utility cycling from the second health assessment these categories  
8 179 are equivalent to: 0 miles/week; 0.01– 9.99 miles/week and  $\geq$  10 miles/week.

10  
11 180 **Mortality outcomes**

12  
13 181 All EPIC-Norfolk participants were flagged for death certification with the UK Office of National Statistics (ONS).  
14 182 Trained nosologists coded death certificates according to the ICD-9 or ICD-10. Cardiovascular death was defined  
15 183 as ICD 410–448 (ICD 9) or ICD I10–I79 (ICD 10) as underlying cause of death, which comprise coronary heart  
16 184 disease (410–414 (ICD 9) or I20–I25 (ICD 10)), stroke (430–438 (ICD 9) or I60–I69 (ICD 10)), cardiac failure  
17 185 (428 (ICD 9) or I50 (ICD 10)) and other vascular causes. Cancer death was defined as ICD 140-208 (ICD9) or  
18 186 ICD C00 – C97 (ICD10) as the underlying cause.

19  
20  
21 187 **Statistical analysis**

22  
23 188 We used exposure data from the first health assessment to examine associations between total cycling and all-  
24 189 cause, cardiovascular and cancer mortality. Exposure data from the second health assessment were used to  
25 190 explore associations between total, and domain specific cycling and mortality and overall physical activity. First,  
26 191 using data collected from the first health assessment, we examined preliminary associations between total  
27 192 cycling and all-cause, cardiovascular and cancer mortality by fitting Cox proportional hazard regression models to  
28 193 estimate hazard ratios and 95% confidence intervals. We first adjusted for sex, age, education level and social  
29 194 class (Model A) and then further adjusted for smoking status, family history of cardiovascular disease or cancer,  
30 195 as well as time spent walking and in other exercise. As sensitivity analyses, we ran a further two models. In the  
31 196 first we adjusted for weekly alcohol consumption and calorie intake; 4% (n=912) of participants had missing data  
32 197 for these variables. In the second, we further adjusted for medication (hypertension and dyslipidaemia) and type  
33 198 2 diabetes as we thought it possible they could be mediating variables on the causal pathway between cycling  
34 199 and mortality. Results of these sub-group analyses did not differ substantially from those of Model B and are not  
35 200 presented. Models were also run after excluding participants who died within two years of follow-up (n=181) to  
36 201 minimise the potential effect of reverse causality. This made no substantive differences to the findings (data not  
37 202 presented).

38  
39  
40  
41 203 We then examined the associations between the domains of cycling and mortality, again by fitting Cox  
42 204 proportional hazard regression models. Equivalent models to those described above were run except that Model  
43 205 B also controlled for all other physical activity energy expenditure (calculated as the sum of all energy  
44 206 expenditure in all domains of physical activity minus that of the respective cycling behaviour). To account for the  
45 207 potentially conservative estimates of commuting cycling undertaken when cycling was selected alongside other  
46 208 modes (see Table 1), by way of sensitivity analysis we applied an alternative assumption that commuter cycling  
47 209 was done for 30% (rather than 10%) of these journeys. Findings remained largely unchanged when using these  
48 210 new estimates. Again, our results were substantively unchanged after adjusting for weekly alcohol consumption  
49 211 and calorie intake, or after excluding the 102 participants who died within two years of follow-up (data not  
50 212 presented).

51  
52  
53  
54 213 For all models the proportional hazard assumption was verified using Schoenfeld residuals and Kaplan-Meier  
55 214 plots for all three outcomes. For all models, we also present p-values for linear trend, calculated by entering the  
56 215 domains of cycling as continuous rather than categorical variables.



1 216 To examine whether any observed associations between cycling and mortality could be explained by differences  
2 217 in overall levels of physical activity, we examined associations between the domains of cycling and physical  
3 218 activity (total leisure-time, total moderate-to-vigorous across all domains, and total light, moderate and vigorous  
4 219 across all domains) by fitting linear regression models with time spent cycling (total and sub domains) as the  
5 220 exposure variables and time spent in (a) recreational and (b) total moderate-to-vigorous physical activity  
6 221 (MET.hr/week) as the outcome variables controlling for sex, age, social class and highest level of education. All  
7 222 analyses were conducted using STATA, version 12.0 (Stata Corp., TX, USA).

## 9 223 RESULTS

### 11 224 Participant characteristics

12 225 At the first health assessment, participants had a mean age of 58 years (SD=19) and just over half were women  
13 226 (55%). 24% of participants reported cycling for a mean of 165 min/week (SD=246). Socio-demographic  
14 227 characteristics of the cohort by cycling status (yes, no) are described in Table 2 (for further details of the baseline  
15 228 characteristics of the sample see Appendix, part 2, Table A1). Respondents who reported any cycling were, on  
16 229 average, younger and more likely to be men. Respondents with no formal qualification were also more likely to  
17 230 cycle compared with respondents with GCSE-level qualifications, while those in skilled or unskilled labour were  
18 231 more likely to cycle than professionals.

19 232 [Insert Table 2 about here]

20 233 By the second health assessment participants had a mean age of 62 (SD 9) years; just over half were women  
21 234 (57%). 30% (n=4030) reported any cycling. Of those who cycled, 62% (n=2808) reported cycling for recreation  
22 235 and 72% (n=3269) reported cycling for utility purposes with 26% (n=862) of these reporting commuting cycling.  
23 236 The average cyclist spent 83 min/week cycling. Those who commuted by bicycle spent an average of 61  
24 237 min/week doing so, while those who cycled for recreation spent an average of 58 min/week doing so. Again, men  
25 238 and those who were younger were more likely to cycle. In addition to the sociodemographic associations  
26 239 observed in data from the first health assessment, respondents working in a managerial/technical position were  
27 240 less likely to cycle than professionals. Employment status also showed a strong association with cycling,  
28 241 probably reflecting the fact that commuting was included in the measure of cycling (see Appendix, part 2, Table  
29 242 A2).

### 30 243 Total cycling (first health assessment) and mortality

31 244 4,398 (20%) participants died during 3,425,498 person-years of follow-up (Table 3). There were 1379 (6.1%)  
32 245 cardiovascular deaths and 1.639 (7.3%) cancer deaths (see Appendix, Part 2, Table A3). Risk of death was  
33 246 associated with being men, older, and having a lower level of education and social class.

34 247 Cycling for at least 60 min/week was associated with a 9% reduction in all-cause mortality after controlling for  
35 248 potential confounders (HR 0.91, 95% CI 0.84, 0.99; Table 3). In the minimally adjusted model, cycling for at least  
36 249 60min/week was associated with a 19% reduction in cardiovascular mortality (HR 0.81, 95% CI 0.69, 0.95),  
37 250 however this was no longer significant after controlling for potential confounders including time spent walking and  
38 251 in other exercise. Cycling was not associated with cancer mortality.

39 252 [Insert Table 3 about here]

### 40 253 Domains of cycling (second health assessment) and mortality

41 254 1,670 (12.5%) individuals died during 149,072 person-years of follow-up. There were 485 (3.6%) cardiovascular  
42 255 deaths and 700 (5.2%) cancer deaths. Again mortality rates were higher among men and older participants (data  
43 256 not shown). There were no significant associations between commuting cycling and all-cause, cardiovascular or  
44 257 cancer mortality in either the minimally adjusted (A) or the additionally adjusted (B) models (Table 4). For both  
45 258 all-cause and cancer mortality, however, there was suggestion of a dose-response relationship between distance



1 259 cycled and risk of death whereby the lowest hazard ratios were observed for the highest levels of commuting  
2 260 cycling, albeit not reaching statistical significance. There was no association between all utility cycling and all-  
3 261 cause, cardiovascular or cancer mortality in either the minimally adjusted (A) or the additionally adjusted (B)  
4 262 models. In minimally adjusted models, recreational cycling for less than 60 min/week was associated with a 19%  
5 263 (95% CI 0.66, 0.99). Further adjusted attenuated the effect. There were no significant associations between total  
6 264 cycling and mortality.

8 265 [Insert Table 4 about here]

### 10 266 **Association between domains of cycling and total physical activity (second health assessment)**

12 267 Total and domain-specific cycling was associated with greater levels of physical activity in an approximately  
13 268 dose-response relationship (Table 5). All utility, recreation and total, but not commuting, cycling were associated  
14 269 with greater recreational physical activity. Importantly, however, commuting cycling was not inversely associated  
15 270 with recreational physical activity, suggesting that adults were not cycling to and from work to compensate for a  
16 271 lack of recreational physical activity. The association between cycling and recreational physical activity was  
17 272 strongest for recreational cycling; those who spent 1 to 59 min/week cycling for pleasure participated in an  
18 273 additional 3 MET.hr/day of recreational physical activity (equivalent to approximately 36 min/day of moderate  
19 274 intensity physical activity).

22 275 All domains of cycling showed significant dose-response relationships with total moderate-to-vigorous physical  
23 276 activity, although the association was strongest for commuting cycling. Those who cycled for  $\geq 60$  min/week  
24 277 spent an additional 7.9 MET.hr/day in moderate-to-vigorous physical activity, (equivalent to 94.8 min/day of  
25 278 moderate intensity physical activity) compared with those who did not.

28 279 [Insert Table 5 about here]

## 30 280 **DISCUSSION**

32 281 We used data from a large population-based cohort to examine the associations between total and domain-  
33 282 specific cycling and mortality. Across all domains, cyclists were more likely to be younger and men, a finding that  
34 283 is consistent with previous studies conducted in countries that have low rates of utility cycling<sup>16-18</sup> but different  
35 284 from the pattern in a number of other European countries where men and women, and the young and old, are  
36 285 equally likely to cycle.<sup>19</sup> An important finding was that cycling, in particular commuting cycling, was associated  
37 286 with participation in greater levels of total physical activity. These findings support an increasing body of work  
38 287 which shows that active travel is done in addition to, rather than instead of, recreational physical activity.<sup>8 9 20 21</sup>  
39 288 Given the time people spend travelling, and the fact that a shift from motorised to active travel may result in  
40 289 environmental and economic benefit, encouraging participation in cycling appears a valuable way to increase  
41 290 participation in overall physical activity.

44 291 Using exposure data from the first health assessment, cycling for at least 60 min/week in total was associated  
45 292 with a 9% reduction in risk of all-cause mortality but was not associated with reductions in risk of cardiovascular  
46 293 and cancer mortality. In the absence of any directly comparable data on total cycling from other studies, these  
47 294 findings provide tentative evidence that modest 'doses' of cycling may be associated with a reduction in mortality  
48 295 risk. They are also broadly consistent with the findings of the Danish study in which a reduction in mortality risk  
49 296 (28%) was associated with an average quantity of cycling that was three times higher (180min/week).<sup>6</sup>

52 297 That being said, when using more precise measures of cycling we found no significant associations between  
53 298 total or domain-specific cycling and mortality. On the one hand, these differences may reflect the more precise  
54 299 measures of physical activity used in the second health assessment which may have not only enabled more  
55 300 accurate categorisation of cycling exposure, but also reduced measurement error regarding the confounding  
56 301 effect of 'other' physical activity. On the other hand, they could reflect a lack of power in analyses of the second  
57 302 health assessment data, which included fewer participants and had a shorter follow-up period.

1 303 Despite five additional years of follow-up and the examination of a higher 'dose' of cycling, our null findings  
2 304 relating to the mortality benefits of commuting and utility cycling in particular mirror those previously reported in  
3 305 this cohort<sup>10</sup> and are consistent with those of previous studies of low-cycling populations in Northern Ireland and  
4 306 France, which found no evidence of a reduced risk of fatal or nonfatal myocardial infarction in men who reported  
5 307 any walking or cycling to work compared with those who did not.<sup>22</sup>

7 308 They are however in contrast to the findings of the studies of Danish<sup>6</sup> and Chinese<sup>7</sup> adults and of a meta-  
8 309 analysis, which pooled evidence from eight studies (from five independent populations) and found that active  
9 310 commuting (walking and cycling) was associated with an overall 11% reduction in the risk of cardiovascular  
10 311 outcomes.<sup>23</sup> Importantly, the levels of commuting cycling reported by participants in these previous studies were  
11 312 substantial and in the meta-analysis, evidence of protective effects was generally limited to higher levels of active  
12 313 commuting.<sup>23</sup> The high 'doses' of utility cycling reported in previous studies are likely to be achieved when cycling  
13 314 journeys are taken frequently and consistently (e.g. twice daily, five days per week). It is possible that frequent  
14 315 short bursts of physical activity of this kind are beneficial to health in their own right, rather than simply by  
15 316 contributing to greater levels of total physical activity as we have shown. In support of this hypothesis, studies  
16 317 have demonstrated that accumulated short bouts of exercise over the day result in longer post-exercise  
17 318 reductions in blood pressure<sup>24</sup> and lower plasma triglycerides<sup>25</sup> than one continuous session of exercise. There is  
18 319 also some evidence that the intensity of cycling is important. A study of Danish adults found a significant inverse  
19 320 association between cycling intensity and all-cause and coronary heart disease mortality,<sup>26</sup> and it may be that  
20 321 participants in our study were not cycling at an intensity sufficient to result in health benefit. It is also possible that  
21 322 the differences reflect the fact that our cohort was older than the Danish and Chinese cohorts.

25 323 To further elucidate the health benefits of cycling and refine the use of tools such as HEAT that may be used to  
26 324 inform policy in this area, future research should aim to estimate the association between cycling and mortality  
27 325 independent of other physical activity, measured with as little error as possible; to extend such analyses to  
28 326 include morbidity endpoints such as incident cardiovascular disease and diabetes; and to clarify how much  
29 327 cycling is sufficient to induce health benefits by quantifying the mean quantity (and preferably intensity) of cycling  
30 328 in each exposure category studied and describing the shape of the dose-response relationship. In the meantime,  
31 329 our results suggest that even modest 'doses' of cycling *may* reduce mortality risk and do not suggest any  
32 330 evidence of an adverse effect, thereby contributing to the growing environmental, social and public health case  
33 331 for promoting cycling in individuals and populations.

### 37 332 **Strengths and limitations**

39 333 This is the first study to examine independent associations between total and domain-specific cycling and  
40 334 mortality. Other strengths of the study include its prospective design, the inclusion of a large heterogeneous  
41 335 population of men and women and its long follow-up. We adjusted our analyses of the second health  
42 336 assessment data for all types of physical activity as well as a range of potential demographic and behavioural  
43 337 confounders which strengthens the inferences made. Excluding participants with existing chronic disease and  
44 338 those who died within two years of follow-up enabled us to control for reverse causality. Given the population-  
45 339 based recruitment from a large geographical area, we believe that our findings are generalizable to middle and  
46 340 older aged adults. There are, however, a number of limitations. Cycling and total physical activity were assessed  
47 341 by self-report. The cycling exposure variables, in particular utility cycling, were derived from relatively crude  
48 342 measures and assumptions had to be made about frequency of cycling, distance travelled and average speed.  
49 343 Due to the low average levels of cycling, we were not able to examine the specific effects of a high 'dose' of  
50 344 cycling and the analyses were underpowered to examine sex differences in the associations which have been  
51 345 previously documented.<sup>23</sup>

### 55 346 **Conclusions**

57 347 Building on previous research that demonstrated inverse associations between high doses of utility cycling and  
58 348 mortality, we used data from a large, population-based cohort to examine associations between more modest

1 349 levels of cycling and mortality. Cycling, in particular for utility purposes, was associated with greater levels of total  
2 350 and moderate-to-vigorous physical activity. This was due largely to the fact that adults who cycled did not  
3 351 participate in less leisure-time physical activity. Despite these positive associations, there was little evidence that  
4 352 cycling was associated with a reduction in mortality risk. While our preliminary findings suggest that low levels of  
5 353 cycling are associated with a reduced risk of mortality these findings were not replicated when using more  
6 354 detailed measures of exposure, albeit in fewer participants who were followed up for a shorter period.  
7  
8 355 Nevertheless, cycling provides an opportunity to incorporate frequent physical activity into activities of daily living,  
9 356 and when done as a means to get from place to place may also confer substantial environmental and economic  
10 357 benefits to society.

11  
12  
13  
14  
15  
16  
17  
18  
19  
20  
21  
22  
23  
24  
25  
26  
27  
28  
29  
30  
31  
32  
33  
34  
35  
36  
37  
38  
39  
40  
41  
42  
43  
44  
45  
46  
47  
48  
49  
50  
51  
52  
53  
54  
55  
56  
57  
58  
59  
60

For peer review only

1 358 **Acknowledgements:** We thank Dr Søren Brage and Dr Marcel Den Hoed for their assistance in cleaning the  
2 359 EPAQ2 data.

3  
4 360 **Contributors:** DO and CF conceived the idea of the analysis and SS and DO designed the analysis with advice  
5 361 from the other authors. SS analysed the data and wrote the initial draft of the manuscript with DO, AG and RKS.  
6 362 KTK, NW and RL contributed to the design of the EPIC-Norfolk study protocol. All authors contributed to the  
7 363 critical review of the design of the analysis and the critical revision of the manuscript and approved the final  
8 364 version.

9  
10 365 **Funding:** DO is supported by the Medical Research Council (Unit Programme number MC\_UP\_1001/1) and by  
11 366 the Centre for Diet and Activity Research (CEDAR), a UKCRC Public Health Research Centre of Excellence  
12 367 which also hosted SS and AG. Funding from the British Heart Foundation, Economic and Social Research  
13 368 Council, Medical Research Council, the National Institute for Health Research, and the Wellcome Trust, under the  
14 369 auspices of the UK Clinical Research Collaboration, is gratefully acknowledged. AG is supported by a National  
15 370 Institute of Health Research (NIHR) post-doctoral fellowship. The views and opinions expressed in this article are  
16 371 those of the authors and do not necessarily reflect those of the NIHR, the Department of Health or other study  
17 372 funders. The EPIC-Norfolk study is funded by the Cancer Research Campaign; the Medical Research Council,  
18 373 the Stroke Association, the British Heart Foundation, the Department of Health, the Europe Against Cancer  
19 374 Programme Commission of the European Union and Ministry of Agriculture, Fisheries and Food. The authors  
20 375 thank the EPIC-Norfolk staff and participants for their valuable contributions.

21 376 **Competing Interests:** None

22 377 **Ethics Approval:** The Norwich District Health Authority Ethics Committee approved the study design and all  
23 378 participants provided written informed consent.

24 379 **Data Sharing:** Statistical code are available on request from Shannon Sahlqvist at  
25 380 shannon.sahlqvist@deakin.edu.au. Researchers wishing to access EPIC data to replicate or extend these  
26 381 analyses should contact Robert Luben (robert.luben@phpc.cam.ac.uk) in the first instance.

27 382

## 383 REFERENCES

- 384 1. Woodcock J, Banister D, Edwards P, et al. Energy and Health 3. *Lancet* 2007;370(9592):1078-88.
- 385 2. Shephard R. Is active commuting the answer to population health? *Sports Med* 2008;38(9):751-58.
- 386 3. Jarrett J, Woodcock J, Griffiths UK, et al. Effect of increasing active travel in urban England and  
387 Wales on costs to the National Health Service. *Lancet* 2012;379:2198-205.
- 388 4. Woodcock J, Givoni M, Morgan AS. Health Impact Modelling of Active Travel Visions for England  
389 and Wales Using an Integrated Transport and Health Impact Modelling Tool (ITHIM). *Plos*  
390 *One* 2013;8(1):e51462.
- 391 5. Kahlmeier S, Cavill N, Dinsdale H, et al. Health economic assessment tools (HEAT) for walking and  
392 for cycling: World Health Organization, 2011.
- 393 6. Andersen L, Schnohr P, Schroll M, et al. All-cause mortality associated with physical activity during  
394 leisure time, work, sports, and cycling to work. *Arch Intern Med* 2000;160:1621-28.
- 395 7. Matthews CE, Jurj AL, Shu X, et al. Influence of exercise, walking, cycling and overall nonexercise  
396 physical activity on mortality in Chinese women. *Am J Epid* 2007;165(12):1343-50.
- 397 8. Sahlqvist S, Song Y, Ogilvie D. Is active travel associated with greater physical activity? The  
398 contribution of commuting and non-commuting active travel to total physical activity in  
399 adults. *Prev Med* 2012;55(3):206-11.
- 400 9. Sahlqvist S, Goodman A, Cooper A, et al. Change in active travel and changes in recreational and  
401 total physical activity in adults: longitudinal findings from the iConnect study. *Int J*  
402 *BehavNutPhys Act* 2013;10(1):28.
- 403 10. Besson H, Ekelund U, Brage S, et al. Relationship between subdomains of total physical activity  
404 and mortality. *Med Sci Sport Exer* 2008;40(11):1909-15.
- 405 11. Khaw K-T, Jakes R, Bingham S, et al. Work and leisure time physical activity assessed using a  
406 simple, pragmatic, validated questionnaire and incident cardiovascular disease and all-cause  
407 mortality in men and women: The European Prospective Investigation into Cancer in Norfolk  
408 prospective population study. *Int J Epidemiol* 2006;35(4):1034-43.
- 409 12. Wareham N, Jakes R, Rennie K, et al. Validity and repeatability of the EPIC-Norfolk Physical  
410 Activity Questionnaire. *Int J Epidemiol* 2002;31:168-74.
- 411 13. Day N, Oakes S, Luben R, et al. EPIC Norfolk: Study design and characteristics of the cohort. *Br J*  
412 *Cancer* 1999;80(Supplement 1):95-103.
- 413 14. Bingham S, Gill C, Welch A, et al. Validation of dietary assessment methods in the UK arm of  
414 EPIC using weighted records, and 24-hour urinary nitrogen and potassium and serum  
415 vitamin C and carotenoids as biomarkers. *Int J Epidemiol* 1997;26:S137-S51
- 416 15. Ainsworth BE, Haskell WL, Leon A, et al. Compendium of physical activities: classification of  
417 energy costs of human physical activities. *Med Sci SportExer* 1993;25(10):1192.
- 418 16. Sahlqvist S, Heesch K. Characteristics of utility cyclists in Queensland, Australia: An examination  
419 of the association between individual, social and environmental factors and utility cycling. *J*  
420 *Phys Act Health* 2012;9:818-28.
- 421 17. Winters M, Friesen MC, Koehoorn M, et al. Utilitarian bicycling: A multilevel analysis of climate  
422 and personal influences. *Am J Prev Med* 2007;32(1):52-58.
- 423 18. Foster C, Panter J, Wareham N. Assessing the impact of road traffic on cycling for leisure and  
424 cycling to work. *Int J BehavNutPhys Act* 2011;8(1):61.
- 425 19. Pucher J, Buehler R. Making cycling irresistible: Lessons from The Netherlands, Denmark and  
426 Germany. *Transport Reviews* 2008;28(4):495-528.
- 427 20. Yang L, Panter J, Griffin SJ, et al. Associations between active commuting and physical activity in  
428 working adults: Cross-sectional results from the Commuting and Health in Cambridge study.  
429 *Prev Med* 2012;55(5):453-57.
- 430 21. Wanner M, Götschi T, Martin-Diener E, et al. Active Transport, Physical Activity, and Body Weight  
431 in Adults: A Systematic Review. *Am J Prev Med* 2012;42(5):493-502.
- 432 22. Wagner A, Simon C, Evans A, et al. Physical Activity and Coronary Event Incidence in Northern  
433 Ireland and France. *Circulation* 2002;105(19):2247-52.
- 434 23. Hamer M, Chida Y. Active commuting and cardiovascular risk: a meta-analytic review. *Prev Med*  
435 2008;46:9-13.

- 1 436 24. Park S, Rink LD, Wallace JP. Accumulation of physical activity leads to a greater blood pressure  
2 437 reduction than a single continuous session, in prehypertension. *J Hyper* 2006;24:1761-70.  
3 438 25. Altna TS, Michaelson JL, Ball SD, et al. Single sessions of intermittent and continuous exercise  
4 439 and postprandial lipemia. *Med Sci Spor Exer* 2004;36(8):1364-71.  
5 440 26. Schnohr P, Marott JL, Jensen JS, et al. Intensity versus duration of cycling, impact on all-cause  
6 441 and coronary heart disease mortality: the Copenhagen City Heart Study. *Euro J Prev Cardiol*  
7 442 2012;19(1):73-80.  
8 443 27. Goodman A, Brand C, Ogilvie D. Associations of health, physical activity and weight status with  
9 444 motorised travel and transport carbon dioxide emissions: a cross-sectional, observational  
10 445 study. *Environ Health* 2012;11(1):52.  
11  
12 446  
13  
14 447  
15  
16 448  
17  
18  
19  
20  
21  
22  
23  
24  
25  
26  
27  
28  
29  
30  
31  
32  
33  
34  
35  
36  
37  
38  
39  
40  
41  
42  
43  
44  
45  
46  
47  
48  
49  
50  
51  
52  
53  
54  
55  
56  
57  
58  
59  
60

For peer review only



## 449 TABLES

450 **Table 1: Cycling exposure measures calculated from the EPAQ2 questionnaire administered at the**  
 451 **second health assessment**

| Exposure                             | Calculation                                                                                                                                                                                                                                                                                                                                                                                                                                                                                                                                                                                                                                                                                                                                                                                                                                                                                                                                                                                                                                                                                                           |
|--------------------------------------|-----------------------------------------------------------------------------------------------------------------------------------------------------------------------------------------------------------------------------------------------------------------------------------------------------------------------------------------------------------------------------------------------------------------------------------------------------------------------------------------------------------------------------------------------------------------------------------------------------------------------------------------------------------------------------------------------------------------------------------------------------------------------------------------------------------------------------------------------------------------------------------------------------------------------------------------------------------------------------------------------------------------------------------------------------------------------------------------------------------------------|
| <i>Commuter cycling</i>              | Respondents were asked how frequently they normally travelled to work by car, public transport, bike or on foot (response options were 'always', 'usually', 'occasionally' or 'never/rarely'). Responses were converted to fractions (always = 1, usually = 0.75, occasionally = 0.25, never / rarely = 0). Participants reported the distance between home and work and the average number of times per week they made this journey (multiplied by two to account for the return journey). When cycling was the only mode selected, total weekly distance cycled was calculated by multiplying the distance from home to work by the number of journeys made. When cycling was selected alongside other modes, the distance cycled was weighted according to the frequency of cycling relative to the frequency of the other modes reported. For example, if a respondent selected 'always' for both cycling and driving it was assumed that cycling accounted for 10%, and driving for 90% of the distance travelled. Total number of journeys was then multiplied by the weighted distance travelled (miles/week). |
| <i>Non-commuting utility cycling</i> | Respondents were asked to recall the average number of journeys they made by bicycle to get about apart from going to work for each of the following distances: 'less than 0.5 miles', '0.5 miles to 1.5 miles', '1.5 to 2.5 miles', '2.5 to 3.5 miles', '3.5 to 5.5 miles', and 'more than 5.5 miles'. Total weekly distance travelled was computed by multiplying the reported number of trips by the midpoint value of each distance category (assumed to be 0.25 for <0.5 miles and 6 for >5.5 miles). These values were then summed to provide a measure of distance travelled (miles/week).                                                                                                                                                                                                                                                                                                                                                                                                                                                                                                                     |
| <i>All utility cycling</i>           | Distance travelled for non-commuting utility cycling was added to distance travelled for commuting cycling to derive a measure of total utility cycling (miles/week).                                                                                                                                                                                                                                                                                                                                                                                                                                                                                                                                                                                                                                                                                                                                                                                                                                                                                                                                                 |
| <i>Recreational cycling</i>          | Respondents reported the average time spent 'cycling for pleasure' per session and the frequency of such sessions: 'none', 'less than once a month', 'once a month', 'two to three times a month', 'once a week', 'two to three times a week', 'four to five times a week', or 'everyday'. Average weekly cycling duration was computed by converting the frequency into a weekly numerical value (e.g. 0.5/52 for 'less than once a month' and (2.5*12)/52 for '2 to 3 times per month'). Time spent cycling (min/week) was computed by multiplying the average session duration by the average weekly frequency.                                                                                                                                                                                                                                                                                                                                                                                                                                                                                                    |
| <i>Total cycling</i>                 | To enable a measure of total cycling to be derived and to allow for comparisons with previous studies the distance travelled for utility cycling was converted into an estimated duration. Based on self-report data from a recent study of UK adults, we assumed an average cycling speed of 10 miles/hour. <sup>27</sup> A measure of total time spent cycling (min/week) was derived by summing time spent in commuting, other utility and recreational cycling.                                                                                                                                                                                                                                                                                                                                                                                                                                                                                                                                                                                                                                                   |

452

453



454 **Table 2: Descriptive characteristics of sample [N (%)] at first health assessment (n=22,450) by cycling**  
 455 **(yes, no)**

| Characteristic                     | 0 min/week: N<br>(column %) | ≥ 1 min/week: N<br>(column %) | OR for any cycling<br>(95%CI) <sup>a</sup> |
|------------------------------------|-----------------------------|-------------------------------|--------------------------------------------|
| Sex                                |                             |                               |                                            |
| Man                                | 3880 (66.9)                 | 1920 (72.0)                   | 1.0                                        |
| Woman                              | 5436 (33.1)                 | 2110 (28.0)                   | 0.92 (0.86, 0.98)                          |
| Age (yrs)                          |                             |                               |                                            |
| 40 – 55                            | 2096 (58.1)                 | 1498 (41.7)                   | 1.0                                        |
| 50 – 65                            | 3105 (67.4)                 | 1473 (32.2)                   | 0.72 (0.67, 0.78)                          |
| ≥65                                | 4115 (79.4)                 | 1059 (20.5)                   | 0.44 (0.40, 0.49)                          |
| Education Level                    |                             |                               |                                            |
| Degree or equivalent               | 1280 (65.6)                 | 670 (34.4)                    | 1.0                                        |
| 'A' Level or equivalent            | 3867 (69.2)                 | 1719 (30.8)                   | 0.91 (0.81, 1.02)                          |
| GCSE or equivalent                 | 1054 (71.0)                 | 431 (29.0)                    | 1.02 (0.95, 1.11)                          |
| No formal qualification            | 3115 (72.09)                | 1210 (28.0)                   | 1.29 (1.15, 1.44)                          |
| Social Class                       |                             |                               |                                            |
| Professional                       | 665 (66.4)                  | 336 (33.6)                    | 1.0                                        |
| Managerial / technical             | 5269 (71.8)                 | 2071 (28.2)                   | 0.90 (0.79, 1.02)                          |
| Skilled / partially skilled labour | 3078 (67.7)                 | 1469 (32.3)                   | 1.15 (1.00, 1.31)                          |
| Unskilled labour                   | 304 (66.4)                  | 154 (33.6)                    | 1.36 (1.08, 1.64)                          |
| Paid Employment                    |                             |                               |                                            |
| No                                 | 8578 (81.0)                 | 2080 (19.0)                   | 1.0                                        |
| Yes                                | 8365 (72.5)                 | 2127 (27.2)                   | 1.05 (0.97, 1.14)                          |

456 <sup>a</sup>Adjusted for all other variables in the table

457 OR = odds ratio, CI = 95% confidence interval

458

Table 3: Prospective associations over 15 years between total cycling and mortality (all-cause, cardiovascular and cancer) in 22,450 participants

| Total cycling             | FU yrs<br>Mean<br>(SD) | All-cause mortality |                      |                      | Cardiovascular mortality |                      |                      | Cancer mortality    |                      |                      |
|---------------------------|------------------------|---------------------|----------------------|----------------------|--------------------------|----------------------|----------------------|---------------------|----------------------|----------------------|
|                           |                        | Events<br>N (%)     | Hazard Ratio (95%CI) |                      | Events<br>N (%)          | Hazard Ratio (95%CI) |                      | Event<br>S<br>N (%) | Hazard Ratio (95%CI) |                      |
|                           |                        |                     | Model A <sup>a</sup> | Model B <sup>b</sup> |                          | Model A <sup>a</sup> | Model B <sup>b</sup> |                     | Model A <sup>a</sup> | Model B <sup>b</sup> |
| 0 min/week                | 15.2<br>(3.4)          | 3,686<br>(21.3)     | 1                    | 1                    | 1179<br>(6.8)            | 1                    | 1                    | 1352<br>(7.8)       | 1                    | 1                    |
| 1 – 59 min/week           | 15.7<br>(2.6)          | 100<br>(10.8)       | 0.86 (0.71, 1.07)    | 0.96 (0.78, 1.17)    | 25<br>(2.7)              | 0.73 (0.49, 1.08)    | 0.83 (0.56, 1.24)    | 44<br>(4.7)         | 0.91 (0.68, 1.24)    | 0.99 (0.73, 1.34)    |
| ≥60 min/week              | 15.7<br>(3.0)          | 612<br>(14.3)       | 0.86 (0.79, 0.94)**  | 0.91 (0.84, 0.99)*   | 179<br>(4.2)             | 0.81 (0.69, 0.95)*   | 0.87 (0.74, 1.02)    | 252<br>(5.9)        | 0.89 (0.77, 1.01)    | 0.93 (0.81, 1.06)    |
| <i>p</i> for linear trend |                        |                     | 0.02                 | 0.06                 |                          | 0.04                 | 0.09                 |                     | 0.20                 | 0.23                 |

\**p* < .05, \*\**p* < .01, \*\*\**p* < .001; 95% CI: 95% confidence interval; FU: follow-up

<sup>a</sup>Adjusted for age, sex, education level and social class

<sup>b</sup>Further adjusted for smoking status, family history of cancer or cardiovascular disease, and other physical activity (walking and other exercise)

Table 4: Prospective association over 11.5 years between cycling (total and domain specific) and mortality (all-cause, cardiovascular and cancer) in 13,346 participants

|                                         | FU yrs<br>Mean<br>(SD) | All-cause mortality |                      |                      | Cardiovascular mortality |                      |                      | Cancer mortality |                      |                      |
|-----------------------------------------|------------------------|---------------------|----------------------|----------------------|--------------------------|----------------------|----------------------|------------------|----------------------|----------------------|
|                                         |                        | Events<br>N (%)     | Hazard Ratio (95%CI) |                      | Events<br>N (%)          | Hazard Ratio (95%CI) |                      | Events<br>N (%)  | Hazard Ratio (95%CI) |                      |
|                                         |                        |                     | Model A <sup>a</sup> | Model B <sup>b</sup> |                          | Model A <sup>a</sup> | Model B <sup>b</sup> |                  | Model A <sup>a</sup> | Model B <sup>b</sup> |
| <b>Commuting</b>                        |                        |                     |                      |                      |                          |                      |                      |                  |                      |                      |
| 0 miles/week<br>(0 min/week)            | 11.1<br>(2.0)          | 1630<br>(13.1)      | 1                    | 1                    | 474<br>(3.8)             | 1                    | 1                    | 679<br>(5.4)     | 1                    | 1                    |
| 0.01-9.99 miles/week<br>(1-59 min/week) | 11.5<br>(1.6)          | 29<br>(4.9)         | 0.87 (0.60, 1.26)    | 0.96 (0.66, 1.39)    | 9<br>(1.5)               | 1.09 (0.56, 2.13)    | 1.23 (0.63, 2.40)    | 16<br>(2.7)      | 0.90 (0.55, 1.49)    | 0.95 (0.57, 1.57)    |
| ≥10 miles/week<br>(≥60 min/week)        | 11.5<br>(1.4)          | 11<br>(4.0)         | 0.80 (0.44, 1.46)    | 0.91 (0.50, 1.65)    | 2<br>(0.7)               | 0.61 (0.15, 2.47)    | 0.71 (0.18, 2.90)    | 5<br>(1.8)       | 0.66 (0.27, 1.59)    | 0.68 (0.28, 1.66)    |
| <i>p</i> for linear trend               |                        |                     | 0.42                 | 0.74                 |                          | 1.00                 | 0.72                 |                  | 0.28                 | 0.34                 |
| <b>All Utility</b>                      |                        |                     |                      |                      |                          |                      |                      |                  |                      |                      |
| 0 miles/week<br>(0 min/week)            | 11.1<br>(2.0)          | 1383<br>(13.2)      | 1                    | 1                    | 392<br>(3.8)             | 1                    | 1                    | 580<br>(5.5)     | 1                    | 1                    |
| 0.01-9.99 miles/week<br>(1-59 min/week) | 11.6<br>(1.8)          | 233<br>(10.4)       | 0.90 (0.78, 1.04)    | 0.95 (0.83, 1.09)    | 75<br>(3.4)              | 1.04 (0.81, 1.34)    | 1.10 (0.85, 1.41)    | 97<br>(4.3)      | 0.85 (0.69, 1.06)    | 0.90 (0.72, 1.11)    |
| ≥10 miles/week<br>(≥60 min/week)        | 11.4<br>(1.8)          | 54<br>(8.4)         | 1.01 (0.77, 1.33)    | 1.10 (0.83, 1.44)    | 18<br>(2.8)              | 1.30 (0.81, 2.10)    | 1.44 (0.89, 2.31)    | 23<br>(3.6)      | 0.89 (0.58, 1.35)    | 0.92 (0.61, 1.41)    |
| <i>p</i> for linear trend               |                        |                     | 0.71                 | 0.33                 |                          | 0.81                 | 0.52                 |                  | 0.94                 | 0.89                 |
| <b>Recreational</b>                     |                        |                     |                      |                      |                          |                      |                      |                  |                      |                      |
| 0 min/week                              | 11.1<br>(2.1)          | 1483<br>(13.7)      | 1                    | 1                    | 438<br>(4.0)             | 1                    | 1                    | 608<br>(5.6)     | 1                    | 1                    |
| 1 – 59 min/week                         | 11.4<br>(1.5)          | 104<br>(5.9)        | 0.81 (0.66, 0.99)*   | 0.87 (0.69, 1.04)    | 25<br>(1.4)              | 0.72 (0.48, 1.09)    | 0.75 (0.50, 1.13)    | 56<br>(3.2)      | 0.90 (0.68, 1.19)    | 0.95 (0.71, 1.25)    |
| ≥60 min/week                            | 11.3<br>(1.8)          | 83<br>(11.1)        | 1.13 (0.90, 1.41)    | 1.25 (0.99, 1.55)    | 22<br>(3.0)              | 1.07 (0.69, 1.65)    | 1.19 (0.77, 1.84)    | 36<br>(4.8)      | 1.06 (0.75, 1.49)    | 1.12 (0.80, 1.58)    |
| <i>p</i> for linear trend               |                        |                     | 0.12                 | 0.05                 |                          | 0.48                 | 0.32                 |                  | 0.46                 | 0.35                 |
| <b>Total cycling</b>                    |                        |                     |                      |                      |                          |                      |                      |                  |                      |                      |
| 0 min/week                              | 11.1<br>(2.1)          | 1308<br>(14.0)      | 1                    | 1                    | 379<br>(4.1)             | 1                    | 1                    | 540<br>(5.8)     | 1                    | 1                    |
| 1 – 59 min/week                         | 11.5<br>(1.8)          | 236<br>(8.9)        | 0.87 (0.76, 1.00)*   | 0.90 (0.79, 1.04)    | 72<br>(2.7)              | 0.95 (0.74, 1.23)    | 0.99 (0.76, 1.23)    | 105<br>(4.0)     | 0.86 (0.70, 1.06)    | 0.90 (0.73, 1.11)    |
| ≥60 min/week                            | 11.4<br>(1.7)          | 126<br>(9.2)        | 1.00 (0.83, 1.21)    | 1.11 (0.91, 1.32)    | 34<br>(2.5)              | 1.00 (0.70, 1.43)    | 1.10 (0.77, 1.57)    | 55<br>(4.0)      | 0.92 (0.69, 1.22)    | 0.98 (0.74, 1.30)    |
| <i>p</i> for linear trend               |                        |                     | 0.08                 | 0.26                 |                          | 0.36                 | 0.18                 |                  | 0.81                 | 0.51                 |

39 \**p* < .05, \*\**p* < .01, \*\*\**p* < .001; 95% CI: 95% confidence interval; FU: follow-up

40 <sup>a</sup>Adjusted for age, sex, education level and social class

41 <sup>b</sup>Further adjusted for smoking status, family history of cancer or cardiovascular disease, and all other physical activity

Table 5: Associations between time spent cycling (total and sub domains; min/week) and physical activity (MET.hr/week) in 13,346 participants

|                                      | N     | Leisure Time PA <sup>a</sup> (MET.hr/week) |                                              | Total MVPA <sup>b</sup> (MET.hr/week) |                                              | Total PA <sup>c</sup> (MET.hr/week) |                                              |
|--------------------------------------|-------|--------------------------------------------|----------------------------------------------|---------------------------------------|----------------------------------------------|-------------------------------------|----------------------------------------------|
|                                      |       | Mean (SD)                                  | Regression coefficient (95% CI) <sup>d</sup> | Mean (SD)                             | Regression coefficient (95% CI) <sup>d</sup> | Mean (SD)                           | Regression coefficient (95% CI) <sup>d</sup> |
| Commuter cycling                     |       |                                            |                                              |                                       |                                              |                                     |                                              |
| 0 miles/week (0 min/week)            | 12484 | 39.4 (37.7)                                | 0                                            | 61.9 (52.3)                           | 0                                            | 82.1 (44.6)                         | 0                                            |
| 0.01-9.99 miles/week (1-59 min/week) | 587   | 35.3 (32.4)                                | -1.6 (-4.7, 1.4)                             | 82.4 (58.0)                           | 12.2 (8.2, 16.2)***                          | 104.9 (46.8)                        | 11.8 (8.3, 15.3)***                          |
| ≥10 miles/week (≥60 min/week)        | 275   | 42.9 (37.6)                                | 1.9 (-2.5, 6.3)                              | 116.6 (63.0)                          | 35.3 (29.5, 41.0)***                         | 128.6 (49.2)                        | 29.7 (24.7, 34.7)***                         |
| All utility cycling                  |       |                                            |                                              |                                       |                                              |                                     |                                              |
| 0 miles/week (0 min/week)            | 10462 | 38.2 (37.1)                                | 0                                            | 60.5 (51.7)                           | 0                                            | 81.2 (44.2)                         | 0                                            |
| 0.01-9.99 miles/week (1-59 min/week) | 2237  | 42.9 (38.5)                                | 3.7 (2.1, 5.4)***                            | 69.6 (55.4)                           | 5.5 (3.3, 7.7)***                            | 89.2 (46.9)                         | 4.4 (2.5, 6.3)***                            |
| ≥10 miles/week (≥60 min/week)        | 647   | 46.7 (39.3)                                | 6.9 (3.9, 9.8)***                            | 99.0 (60.4)                           | 25.0 (21.2, 28.9)***                         | 112.1 (50.0)                        | 20.2 (16.9, 23.6)***                         |
| Leisure-time cycling                 |       |                                            |                                              |                                       |                                              |                                     |                                              |
| 0 min/week                           | 10843 | 37.3 (36.5)                                | 0                                            | 60.0 (51.7)                           | 0                                            | 80.5 (44.1)                         | 0                                            |
| 1-59 min/week                        | 1756  | 41.0 (35.4)                                | 4.2 (2.3, 6.1)***                            | 73.8 (53.9)                           | 4.7 (2.3, 7.2)***                            | 95.3 (45.3)                         | 4.9 (2.8, 7.0)***                            |
| ≥60 min/week                         | 747   | 64.6 (46.6)                                | 25.6 (22.9, 28.2)***                         | 98.0 (61.5)                           | 27.4 (23.9, 31.0)***                         | 110.2 (52.5)                        | 21.9 (18.9, 25.0)***                         |
| Total cycling                        |       |                                            |                                              |                                       |                                              |                                     |                                              |
| 0 min/week                           | 9316  | 37.2 (36.6)                                | 0                                            | 58.5 (50.8)                           | 0                                            | 79.3 (43.6)                         | 0                                            |
| 1-59 min/week                        | 2654  | 39.7 (35.8)                                | 3.2 (1.6, 4.9)***                            | 67.0 (53.1)                           | 2.9 (0.8, 5.0)*                              | 88.3 (45.0)                         | 2.6 (0.8, 4.4)*                              |
| ≥60 min/week                         | 1376  | 52.4 (43.6)                                | 14.2 (12.2, 16.3)***                         | 94.4 (60.5)                           | 24.1 (21.3, 26.8)***                         | 108.7 (50.7)                        | 19.5 (17.1, 21.8)***                         |

\*p &lt; .05, \*\*p &lt; .01, \*\*\*p &lt; .001

SD: standard deviation; 95% CI: 95% confidence interval; MVPA: moderate-to-vigorous physical activity; PA: physical activity

<sup>a</sup>Computed as the sum of all moderate-to-vigorous leisure-time physical activity<sup>b</sup>Computed as the sum of all moderate-to-vigorous physical activity across all domains (leisure-time, household, work, commute)<sup>c</sup>Computed as the sum of all light and moderate-to-vigorous physical activity across all domains (leisure-time, household, work, commute)<sup>d</sup>Adjusted for age, sex, education and social class

1 **The association of cycling with all-cause, cardiovascular and cancer mortality: findings from the**  
2 **population based EPIC-Norfolk cohort**

3  
4 Shannon Sahlqvist<sup>1,2,3</sup>, Anna Goodman<sup>2,4</sup>, Rebecca K. Simmons<sup>1</sup>, Kay-Tee Khaw<sup>5</sup>, Nick Cavill<sup>6,7</sup>, Charlie Foster<sup>7</sup>,  
5 Robert Luben<sup>8</sup>, Nicholas J. Wareham<sup>1,2</sup> & David Ogilvie<sup>1,2</sup>  
6

7 <sup>1</sup>Medical Research Council Epidemiology Unit, University of Cambridge, UK

8 <sup>2</sup>UKCRC Centre for Diet and Activity Research (CEDAR), University of Cambridge, UK

9 <sup>3</sup>Centre for Physical Activity and Nutrition Research (C-PAN), School of Exercise and Nutrition Sciences, Deakin  
10 University, Geelong, Australia

11 <sup>4</sup>Faculty of Epidemiology and Population Health, London School of Hygiene and Tropical Medicine, London, UK

12 <sup>5</sup>Department of Gerontology in Clinical Medicine, University of Cambridge, UK

13 <sup>6</sup>Cavill Associates, Stockport, UK

14 <sup>7</sup>British Heart Foundation Health Promotion Research Group, Nuffield Department of Population Health,  
15 University of Oxford, UK

16 <sup>8</sup>Department of Public Health and Primary Care, Institute of Public Health, University of Cambridge School of  
17 Clinical Medicine, Cambridge, UK  
18

19 Corresponding Author:

20 Shannon Sahlqvist

21 Centre for Physical Activity and Nutrition Research (C-PAN)

22 School of Exercise and Nutrition Sciences

23 Faculty of Health

24 Locked Bag 2000

25 Geelong Victoria 3220 Australia

26 Email: shannon.sahlqvist@deakin.edu.au

27 Telephone: 0061 3 9251 7782

28 Fax: 0061 2 5337 2211  
29

30 Word Count: 3770

31 Number of pages: 23

32 Numbers of tables: 5  
33

34

35 **ABSTRACT**

36 Objectives: To investigate associations between modest levels of total and domain-specific (commuting, other  
37 utility, recreational) cycling and mortality from all causes, cardiovascular disease and cancer.

38 Design: Population-based cohort study (EPIC-Norfolk).

39 Setting: Participants were recruited from general practices in the east of England and attended health  
40 examinations between 1993 and 1997 and again between 1998 and 2000. At the first health assessment,  
41 participants reported their average weekly duration of cycling for all purposes using a simple measure of physical  
42 activity. At the second health assessment, participants reported a more detailed breakdown of their weekly  
43 cycling behaviour using the EPAQ2 physical activity questionnaire.

44 Participants: Adults aged 40 – 79 years at the first health assessment.

45 Primary Outcome Measure: All participants were followed for mortality (all-cause, cardiovascular and cancer)  
46 until March 2011.

47 Results: There were 22,450 participants with complete data at the first health assessment, of whom 4,398 died  
48 during follow-up; and 13,346 participants with complete data at the second health assessment, of whom 1,670  
49 died during follow-up. Preliminary analyses using exposure data from the first health assessment showed that  
50 cycling for at least 60 min/week in total was associated with a 9% reduced risk of all-cause mortality (adjusted  
51 hazard ratio 0.91, 95%CI 0.84, 0.99). Using the more precise measures of cycling available from the second  
52 health assessment, all types of cycling were associated with greater total moderate-to-vigorous physical activity,  
53 however there was little evidence of an association between overall or domain-specific cycling and mortality.

54 Conclusions: Cycling, in particular for utility purposes, was associated with greater moderate-to-vigorous and  
55 total physical activity. While this study provides tentative evidence that modest levels of cycling may reduce the  
56 risk of mortality, further research is required to confirm how much cycling is sufficient to induce health benefits.

57 Keywords: active travel, physical activity, commuting

58 **ARTICLE SUMMARY**

## 59 Article Focus

60 Cycling, particularly for transport, is promoted as a way of increasing regular physical activity among adults.  
61 Longitudinal studies have demonstrated associations between utility cycling and reduced mortality. However,  
62 these associations have been reported only for the highest exposure groups reporting substantial volumes of  
63 cycling (i.e.  $\geq 180$  min/wk).

64 We examined associations between mortality and lower volumes of total, and domain-specific, cycling in a  
65 population of UK adults.

## 66 Key Message

67 In this population with relatively low levels of cycling, preliminary analyses using a single item to measure total  
68 cycling revealed that cycling for as little as 60 min/week in total was associated with a reduced risk of all-cause  
69 mortality.

70 By contrast, in more substantive analyses using a detailed breakdown of cycling behaviour, neither total nor  
71 domain-specific cycling were associated with a reduced risk of mortality.

72 **Our results provide tentative support for the hypothesis that modest 'doses' of cycling may reduce mortality risk  
73 and do not suggest any evidence of an adverse effect. Given that we also demonstrated that cycling is  
74 associated with the accumulation of greater total physical activity these findings contribute to the growing  
75 environmental, social and public health case for promoting cycling in individuals and populations.**

## 76 Strengths and Limitations of this Study

77 Strengths of this study include its prospective design, the inclusion of a large heterogeneous population of men  
78 and women and the long follow-up. Further, this study used detailed measures of cycling and overall physical  
79 activity to examine associations between the various domains of cycling and mortality.

80 Due to the low average levels of cycling we were not able to examine the specific effects of a higher 'dose' of  
81 cycling, and the analyses were underpowered to examine sex differences in the associations between cycling  
82 and mortality.

83



## 84 INTRODUCTION

85 Promoting cycling as an alternative to motorised transport would result in reduced carbon emissions, traffic  
86 congestion and noise pollution while providing people with an opportunity to integrate regular physical activity  
87 into their lives.<sup>1,2</sup> As such, there is increasing policy interest in quantifying the health benefits of cycling so that  
88 they can be accurately modelled in the economic appraisal of proposed policies and interventions in the transport  
89 and health sectors.<sup>3,4</sup> One such tool developed by the World Health Organisation (Health Economic Assessment  
90 Tool; HEAT) estimates the economic value of a reduction in mortality as a consequence of population increases  
91 in cycling.<sup>5</sup> It does so by assuming a linear dose-response relationship between cycling and mortality and that  
92 any increase in cycling is in addition to other physical activity.

93 HEAT model estimates are dependent on the use of a relative risk estimate from a single study of Danish adults.  
94 The study reported a 28% reduction in all-cause mortality in adults who cycled to and from work compared with  
95 those who did not, even after controlling for other physical activity.<sup>6</sup> Similarly, an inverse association between  
96 transport (utility) cycling more generally and all-cause and cancer mortality has been reported in a cohort of  
97 Chinese women.<sup>7</sup> These findings are likely to reflect, in part, the fact that utility cycling translates into greater  
98 overall physical activity.<sup>8,9</sup>

99 While these studies suggest substantial health benefit associated with utility cycling, an examination of the  
100 benefits of recreational cycling would also be valuable to enable more informed policy recommendations on  
101 which type of cycling to promote.

102 Furthermore, it is possible that the findings from these studies reflect, at least to some extent, residual  
103 confounding from 'other' physical activity. In particular, the Danish study controlled for recreational physical  
104 activity using responses to a single item which asked participants to select from one of four options ranging from  
105 'you are almost entirely sedentary or perform light physical activity less than two hours per week' to 'you perform  
106 highly vigorous physical activity more than four hours per week or regular exercise or competitive sports several  
107 times per week'.<sup>6</sup> The extent to which responses to this item were independent of those regarding commuter  
108 cycling was not reported.

109 In addition, in the two prior studies which reported associations between utility cycling and mortality, the time  
110 spent cycling for transport in the exposed groups was substantial, reflecting the relatively high levels of cycling in  
111 those countries. For example, in the Danish study, those who commuted by bike spent an average of 180  
112 min/week doing so.<sup>6</sup> In the study of Chinese women, 19% cycled for up to 3.4 Metabolic Equivalents  
113 (MET).hr/day while a further 5% cycled for greater than 3.5 MET.hr/day, equivalent to approximately 350  
114 min/week.<sup>7</sup> Few studies have examined associations between cycling and mortality in populations such as that of  
115 the UK, which have a low prevalence of utility cycling by international standards. One previous study of adults in  
116 the EPIC-Norfolk cohort found no significant association between commuter cycling and either cardiovascular or  
117 all-cause mortality.<sup>10</sup> These null findings may partly reflect the cut points used to define cycling categories: the  
118 cut point for the highest category was 30 min/week, which may be an insufficient 'dose' to induce health benefits.  
119 It is also possible that the relatively short duration of follow-up (seven years) and the small number of deaths in  
120 the cohort limited the power of the study to detect effects.

121 Building on these previous analyses of EPIC-Norfolk cohort data, this paper aims to investigate more  
122 comprehensively the mortality benefits of cycling. First, we use a simple pragmatic measure of physical activity to  
123 examine associations between total cycling and all-cause, cardiovascular and cancer mortality over 15 years.  
124 Second, using a more detailed, disaggregate measure of physical activity which provides more accurate  
125 estimates of domain-specific cycling (commuting, all utility, and recreational) for a subset of our sample, we  
126 explore whether this association is driven by particular domains of cycling (e.g. utility vs. recreational). Finally, to  
127 help explain any associations between domain-specific cycling and mortality, we examine associations between  
128 these domains of cycling and total physical activity.

129

**METHODS****Study design and participants**

This study uses data from the EPIC-Norfolk cohort, part of the 10-country collaborative European Prospective Investigation into Cancer and Nutrition study (EPIC). Between 1993 and 1997, 25,633 adults aged 40 – 79 years were recruited from general practices in the county of Norfolk in the east of England and attended a health examination. As part of this examination, participants completed a short physical activity questionnaire which asked about time spent walking and cycling for all purposes and time spent in other exercise.<sup>11</sup> Between January 1998 and October 2000, 15,519 (61%) of the original cohort attended a second health assessment, completing a more detailed questionnaire on recreational, occupational, utility and household physical activity (EPAQ2).<sup>12</sup>

Data from the first health assessment were used to examine the association between total cycling and cardiovascular disease, while data from the second were used to examine the association between the domains of cycling and cardiovascular disease. Full details of the study are reported elsewhere.<sup>13</sup>

Of the participants in the first health assessment, we excluded those with self-reported cardiovascular disease (n=1,102) or cancer (n=1,327) and those with missing data (n=784) leaving 22,450 for analysis.

Similarly, of those who returned for the second health assessment, we excluded those with self-reported cardiovascular disease (n=772) or cancer (n=1,115) and those with missing data (n=286), leaving 13,346 for analysis. All participants were followed up for mortality to 31 March 2011 (mean 15.3 years (SD=3.3) from first health assessment, mean 11.5 years (SD = 2.0) from second health assessment). The Norwich District Health Authority Ethics Committee approved the study design and all participants provided written informed consent.

**Health assessments**

At both health assessments participants reported their level of education (categorised as no formal qualification; GCSE or equivalent, i.e. exams normally taken at age 16; 'A' level or equivalent, i.e. exams normally taken at age 18; university degree or equivalent), paid employment status (yes, no), social class (categorised as professional, managerial/technical job, skilled/partially skilled labour, unskilled labour), smoking status (current, former, never), anti-hypertensive medication (yes, no), medication for dyslipidaemia (yes, no) and family history of cancer and cardiovascular disease (yes, no). History of myocardial infarction, stroke, and cancer were also reported. Total energy intake (kJ/day) and alcohol consumption (units/week) were derived from a validated 130-item semi-quantitative food-frequency questionnaire.<sup>14</sup>

**Measurement of physical activity at first health assessment**

Physical activity was assessed by asking participants to report, separately for winter and summer, the weekly time (in hours) spent walking and cycling (separately) to work and during leisure, and in other exercise.<sup>11</sup> Total cycling was calculated as the average weekly time spent in winter and summer (min/week). See Appendix, part 1.

**Measurement of physical activity at second health assessment**

Physical activity, including cycling, was assessed with the validated and reliable EPAQ2 questionnaire, which asks participants to recall their physical activity behaviour across the domains of household, work, recreation and commuting, over the past year.<sup>12</sup> Energy expenditure [MET.hr/week] was calculated using the physical activity compendium.<sup>15</sup> Following standard EPAQ2 data reduction rules we calculated four specific cycling measures explained in detail in Table 1. In addition, total moderate-to-vigorous physical activity was calculated as the sum of all moderate and vigorous physical activity across all domains (home, work, recreation and commuting; MET.hr/week) and recreational physical activity was computed as the sum of all moderate and vigorous activity done during recreation specifically (MET.hr/week). A copy of the questionnaire can be found at: <http://www.srl.cam.ac.uk/epic/questionnaires/epaq2/epaq2.pdf>.

1 173 [Insert Table 1 about here]

2  
3 174 **Cycling exposure**

4 175 Given the highly skewed nature of the cycling data and to allow for comparisons with previous studies, we  
5 176 created three categories of cycling exposure: 0 min/week, 1 – 59 min/week and  $\geq 60$  min/week. These represent  
6 177 levels of cycling which we believe are realistic to achieve in countries such as the UK, which currently have low  
7 178 levels of utility cycling. For our measures of utility cycling from the second health assessment these categories  
8 179 are equivalent to: 0 miles/week; 0.01– 9.99 miles/week and  $\geq 10$  miles/week.

10  
11 180 **Mortality outcomes**

12  
13 181 All EPIC-Norfolk participants were flagged for death certification with the UK Office of National Statistics (ONS).  
14 182 Trained nosologists coded death certificates according to the ICD-9 or ICD-10. Cardiovascular death was defined  
15 183 as ICD 410–448 (ICD 9) or ICD I10–I79 (ICD 10) as underlying cause of death, which comprise coronary heart  
16 184 disease (410–414 (ICD 9) or I20–I25 (ICD 10)), stroke (430–438 (ICD 9) or I60–I69 (ICD 10)), cardiac failure  
17 185 (428 (ICD 9) or I50 (ICD 10)) and other vascular causes. Cancer death was defined as ICD 140-208 (ICD9) or  
18 186 ICD C00 – C97 (ICD10) as the underlying cause.

19  
20  
21 187 **Statistical analysis**

22  
23 188 We used exposure data from the first health assessment to examine associations between total cycling and all-  
24 189 cause, cardiovascular and cancer mortality. Exposure data from the second health assessment were used to  
25 190 explore associations between total, and domain specific cycling and mortality and overall physical activity. First,  
26 191 using data collected from the first health assessment, we examined preliminary associations between total  
27 192 cycling and all-cause, cardiovascular and cancer mortality by fitting Cox proportional hazard regression models to  
28 193 estimate hazard ratios and 95% confidence intervals. We first adjusted for sex, age, education level and social  
29 194 class (Model A) and then further adjusted for smoking status, family history of cardiovascular disease or cancer,  
30 195 as well as time spent walking and in other exercise. As sensitivity analyses, we ran a further two models. In the  
31 196 first we adjusted for weekly alcohol consumption and calorie intake; 4% (n=912) of participants had missing data  
32 197 for these variables. In the second, we further adjusted for medication (hypertension and dyslipidaemia) and type  
33 198 2 diabetes as we thought it possible they could be mediating variables on the causal pathway between cycling  
34 199 and mortality. Results of these sub-group analyses did not differ substantially from those of Model B and are not  
35 200 presented. Models were also run after excluding participants who died within two years of follow-up (n=181) to  
36 201 minimise the potential effect of reverse causality. This made no substantive differences to the findings (data not  
37 202 presented).

38  
39  
40  
41 203 We then examined the associations between the domains of cycling and mortality, again by fitting Cox  
42 204 proportional hazard regression models. Equivalent models to those described above were run except that Model  
43 205 B also controlled for all other physical activity energy expenditure (calculated as the sum of all energy  
44 206 expenditure in all domains of physical activity minus that of the respective cycling behaviour). To account for the  
45 207 potentially conservative estimates of commuting cycling undertaken when cycling was selected alongside other  
46 208 modes (see Table 1), by way of sensitivity analysis we applied an alternative assumption that commuter cycling  
47 209 was done for 30% (rather than 10%) of these journeys. Findings remained largely unchanged when using these  
48 210 new estimates. Again, our results were substantively unchanged after adjusting for weekly alcohol consumption  
49 211 and calorie intake, or after excluding the 102 participants who died within two years of follow-up (data not  
50 212 presented).

51  
52  
53  
54 213 For all models the proportional hazard assumption was verified using Schoenfeld residuals and Kaplan-Meier  
55 214 plots for all three outcomes. For all models, we also present p-values for linear trend, calculated by entering the  
56 215 domains of cycling as continuous rather than categorical variables.

1 216 To examine whether any observed associations between cycling and mortality could be explained by differences  
2 217 in overall levels of physical activity, we examined associations between the domains of cycling and physical  
3 218 activity (total leisure-time, total moderate-to-vigorous across all domains, and total light, moderate and vigorous  
4 219 across all domains) by fitting linear regression models with time spent cycling (total and sub domains) as the  
5 220 exposure variables and time spent in (a) recreational and (b) total moderate-to-vigorous physical activity  
6 221 (MET.hr/week) as the outcome variables controlling for sex, age, social class and highest level of education. All  
7 222 analyses were conducted using STATA, version 12.0 (Stata Corp., TX, USA).

## 9 223 RESULTS

### 11 224 Participant characteristics

12 225 At the first health assessment, participants had a mean age of 58 years (SD=19) and just over half were women  
13 226 (55%). 24% of participants reported cycling for a mean of 165 min/week (SD=246). Socio-demographic  
14 227 characteristics of the cohort by cycling status (yes, no) are described in Table 2 (for further details of the baseline  
15 228 characteristics of the sample see Appendix, part 2, Table A1). Respondents who reported any cycling were, on  
16 229 average, younger and more likely to be men. Respondents with no formal qualification were also more likely to  
17 230 cycle compared with respondents with GCSE-level qualifications, while those in skilled or unskilled labour were  
18 231 more likely to cycle than professionals.

19 232 [Insert Table 2 about here]

20 233 By the second health assessment participants had a mean age of 62 (SD 9) years; just over half were women  
21 234 (57%). 30% (n=4030) reported any cycling. Of those who cycled, 62% (n=2808) reported cycling for recreation  
22 235 and 72% (n=3269) reported cycling for utility purposes with 26% (n=862) of these reporting commuting cycling.  
23 236 The average cyclist spent 83 min/week cycling. Those who commuted by bicycle spent an average of 61  
24 237 min/week doing so, while those who cycled for recreation spent an average of 58 min/week doing so. Again, men  
25 238 and those who were younger were more likely to cycle. In addition to the sociodemographic associations  
26 239 observed in data from the first health assessment, respondents working in a managerial/technical position were  
27 240 less likely to cycle than professionals. Employment status also showed a strong association with cycling,  
28 241 probably reflecting the fact that commuting was included in the measure of cycling (see Appendix, part 2, Table  
29 242 A2).

### 30 243 Total cycling (first health assessment) and mortality

31 244 4,398 (20%) participants died during 3,425,498 person-years of follow-up (Table 3). There were 1379 (6.1%)  
32 245 cardiovascular deaths and 1.639 (7.3%) cancer deaths (see Appendix, Part 2, Table A3). Risk of death was  
33 246 associated with being men, older, and having a lower level of education and social class.

34 247 Cycling for at least 60 min/week was associated with a 9% reduction in all-cause mortality after controlling for  
35 248 potential confounders (HR 0.91, 95% CI 0.84, 0.99; Table 3). In the minimally adjusted model, cycling for at least  
36 249 60min/week was associated with a 19% reduction in cardiovascular mortality (HR 0.81, 95% CI 0.69, 0.95),  
37 250 however this was no longer significant after controlling for potential confounders including time spent walking and  
38 251 in other exercise. Cycling was not associated with cancer mortality.

39 252 [Insert Table 3 about here]

### 40 253 Domains of cycling (second health assessment) and mortality

41 254 1,670 (12.5%) individuals died during 149,072 person-years of follow-up. There were 485 (3.6%) cardiovascular  
42 255 deaths and 700 (5.2%) cancer deaths. Again mortality rates were higher among men and older participants (data  
43 256 not shown). There were no significant associations between commuting cycling and all-cause, cardiovascular or  
44 257 cancer mortality in either the minimally adjusted (A) or the additionally adjusted (B) models (Table 4). For both  
45 258 all-cause and cancer mortality, however, there was suggestion of a dose-response relationship between distance



1 259 cycled and risk of death whereby the lowest hazard ratios were observed for the highest levels of commuting  
2 260 cycling, albeit not reaching statistical significance. There was no association between all utility cycling and all-  
3 261 cause, cardiovascular or cancer mortality in either the minimally adjusted (A) or the additionally adjusted (B)  
4 262 models. In minimally adjusted models, recreational cycling for less than 60 min/week was associated with a 19%  
5 263 (95% CI 0.66, 0.99). Further adjusted attenuated the effect. There were no significant associations between total  
6 264 cycling and mortality.

8 265 [Insert Table 4 about here]

### 10 266 **Association between domains of cycling and total physical activity (second health assessment)**

12 267 Total and domain-specific cycling was associated with greater levels of physical activity in an approximately  
13 268 dose-response relationship (Table 5). All utility, recreation and total, but not commuting, cycling were associated  
14 269 with greater recreational physical activity. Importantly, however, commuting cycling was not inversely associated  
15 270 with recreational physical activity, suggesting that adults were not cycling to and from work to compensate for a  
16 271 lack of recreational physical activity. The association between cycling and recreational physical activity was  
17 272 strongest for recreational cycling; those who spent 1 to 59 min/week cycling for pleasure participated in an  
18 273 additional 3 MET.hr/day of recreational physical activity (equivalent to approximately 36 min/day of moderate  
19 274 intensity physical activity).

22 275 All domains of cycling showed significant dose-response relationships with total moderate-to-vigorous physical  
23 276 activity, although the association was strongest for commuting cycling. Those who cycled for  $\geq 60$  min/week  
24 277 spent an additional 7.9 MET.hr/day in moderate-to-vigorous physical activity, (equivalent to 94.8 min/day of  
25 278 moderate intensity physical activity) compared with those who did not.

28 279 [Insert Table 5 about here]

## 30 280 **DISCUSSION**

32 281 We used data from a large population-based cohort to examine the associations between total and domain-  
33 282 specific cycling and mortality. Across all domains, cyclists were more likely to be younger and men, a finding that  
34 283 is consistent with previous studies conducted in countries that have low rates of utility cycling<sup>16-18</sup> but different  
35 284 from the pattern in a number of other European countries where men and women, and the young and old, are  
36 285 equally likely to cycle.<sup>19</sup> An important finding was that cycling, in particular commuting cycling, was associated  
37 286 with participation in greater levels of total physical activity. These findings support an increasing body of work  
38 287 which shows that active travel is done in addition to, rather than instead of, recreational physical activity.<sup>8 9 20 21</sup>  
39 288 Given the time people spend travelling, and the fact that a shift from motorised to active travel may result in  
40 289 environmental and economic benefit, encouraging participation in cycling appears a valuable way to increase  
41 290 participation in overall physical activity.

44 291 Using exposure data from the first health assessment, cycling for at least 60 min/week in total was associated  
45 292 with a 9% reduction in risk of all-cause mortality but was not associated with reductions in risk of cardiovascular  
46 293 and cancer mortality. In the absence of any directly comparable data on total cycling from other studies, these  
47 294 findings provide tentative evidence that modest 'doses' of cycling may be associated with a reduction in mortality  
48 295 risk. They are also broadly consistent with the findings of the Danish study in which a reduction in mortality risk  
49 296 (28%) was associated with an average quantity of cycling that was three times higher (180min/week).<sup>6</sup>

52 297 That being said, when using more precise measures of cycling we found no significant associations between  
53 298 total or domain-specific cycling and mortality. On the one hand, these differences may reflect the more precise  
54 299 measures of physical activity used in the second health assessment which may have not only enabled more  
55 300 accurate categorisation of cycling exposure, but also reduced measurement error regarding the confounding  
56 301 effect of 'other' physical activity. On the other hand, they could reflect a lack of power in analyses of the second  
57 302 health assessment data, which included fewer participants and had a shorter follow-up period.

1 303 Despite five additional years of follow-up and the examination of a higher 'dose' of cycling, our null findings  
2 304 relating to the mortality benefits of commuting and utility cycling in particular mirror those previously reported in  
3 305 this cohort<sup>10</sup> and are consistent with those of previous studies of low-cycling populations in Northern Ireland and  
4 306 France, which found no evidence of a reduced risk of fatal or nonfatal myocardial infarction in men who reported  
5 307 any walking or cycling to work compared with those who did not.<sup>22</sup>

7 308 They are however in contrast to the findings of the studies of Danish<sup>6</sup> and Chinese<sup>7</sup> adults and of a meta-  
8 309 analysis, which pooled evidence from eight studies (from five independent populations) and found that active  
9 310 commuting (walking and cycling) was associated with an overall 11% reduction in the risk of cardiovascular  
10 311 outcomes.<sup>23</sup> Importantly, the levels of commuting cycling reported by participants in these previous studies were  
11 312 substantial and in the meta-analysis, evidence of protective effects was generally limited to higher levels of active  
12 313 commuting.<sup>23</sup> The high 'doses' of utility cycling reported in previous studies are likely to be achieved when cycling  
13 314 journeys are taken frequently and consistently (e.g. twice daily, five days per week). It is possible that frequent  
14 315 short bursts of physical activity of this kind are beneficial to health in their own right, rather than simply by  
15 316 contributing to greater levels of total physical activity as we have shown. In support of this hypothesis, studies  
16 317 have demonstrated that accumulated short bouts of exercise over the day result in longer post-exercise  
17 318 reductions in blood pressure<sup>24</sup> and lower plasma triglycerides<sup>25</sup> than one continuous session of exercise. There is  
18 319 also some evidence that the intensity of cycling is important. A study of Danish adults found a significant inverse  
19 320 association between cycling intensity and all-cause and coronary heart disease mortality,<sup>26</sup> and it may be that  
20 321 participants in our study were not cycling at an intensity sufficient to result in health benefit. It is also possible that  
21 322 the differences reflect the fact that our cohort was older than the Danish and Chinese cohorts.

25 323 To further elucidate the health benefits of cycling and refine the use of tools such as HEAT that may be used to  
26 324 inform policy in this area, future research should aim to estimate the association between cycling and mortality  
27 325 independent of other physical activity, measured with as little error as possible; to extend such analyses to  
28 326 include morbidity endpoints such as incident cardiovascular disease and diabetes; and to clarify how much  
29 327 cycling is sufficient to induce health benefits by quantifying the mean quantity (and preferably intensity) of cycling  
30 328 in each exposure category studied and describing the shape of the dose-response relationship. In the meantime,  
31 329 our results suggest that even modest 'doses' of cycling *may* reduce mortality risk and do not suggest any  
32 330 evidence of an adverse effect, thereby contributing to the growing environmental, social and public health case  
33 331 for promoting cycling in individuals and populations.

### 37 332 **Strengths and limitations**

39 333 This is the first study to examine independent associations between total and domain-specific cycling and  
40 334 mortality. Other strengths of the study include its prospective design, the inclusion of a large heterogeneous  
41 335 population of men and women and its long follow-up. We adjusted our analyses of the second health  
42 336 assessment data for all types of physical activity as well as a range of potential demographic and behavioural  
43 337 confounders which strengthens the inferences made. Excluding participants with existing chronic disease and  
44 338 those who died within two years of follow-up enabled us to control for reverse causality. Given the population-  
45 339 based recruitment from a large geographical area, we believe that our findings are generalizable to middle and  
46 340 older aged adults. There are, however, a number of limitations. Cycling and total physical activity were assessed  
47 341 by self-report. The cycling exposure variables, in particular utility cycling, were derived from relatively crude  
48 342 measures and assumptions had to be made about frequency of cycling, distance travelled and average speed.  
49 343 Due to the low average levels of cycling, we were not able to examine the specific effects of a high 'dose' of  
50 344 cycling and the analyses were underpowered to examine sex differences in the associations which have been  
51 345 previously documented.<sup>23</sup>

### 55 346 **Conclusions**

57 347 Building on previous research that demonstrated inverse associations between high doses of utility cycling and  
58 348 mortality, we used data from a large, population-based cohort to examine associations between more modest

1 349 levels of cycling and mortality. Cycling, in particular for utility purposes, was associated with greater levels of total  
2 350 and moderate-to-vigorous physical activity. This was due largely to the fact that adults who cycled did not  
3 351 participate in less leisure-time physical activity. Despite these positive associations, there was little evidence that  
4 352 cycling was associated with a reduction in mortality risk. While our preliminary findings suggest that low levels of  
5 353 cycling are associated with a reduced risk of mortality these findings were not replicated when using more  
6 354 detailed measures of exposure, albeit in fewer participants who were followed up for a shorter period.  
7  
8 355 Nevertheless, cycling provides an opportunity to incorporate frequent physical activity into activities of daily living,  
9 356 and when done as a means to get from place to place may also confer substantial environmental and economic  
10 357 benefits to society.

11  
12  
13  
14  
15  
16  
17  
18  
19  
20  
21  
22  
23  
24  
25  
26  
27  
28  
29  
30  
31  
32  
33  
34  
35  
36  
37  
38  
39  
40  
41  
42  
43  
44  
45  
46  
47  
48  
49  
50  
51  
52  
53  
54  
55  
56  
57  
58  
59  
60

For peer review only



1 358 **Acknowledgements:** We thank Dr Søren Brage and Dr Marcel Den Hoed for their assistance in cleaning the  
2 359 EPAQ2 data.

3  
4 360 **Contributors:** DO and CF conceived the idea of the analysis and SS and DO designed the analysis with advice  
5 361 from the other authors. SS analysed the data and wrote the initial draft of the manuscript with DO, AG and RKS.  
6 362 KTK, NW and RL contributed to the design of the EPIC-Norfolk study protocol. All authors contributed to the  
7 363 critical review of the design of the analysis and the critical revision of the manuscript and approved the final  
8 364 version.

9  
10 365 **Funding:** DO is supported by the Medical Research Council (Unit Programme number MC\_UP\_1001/1) and by  
11 366 the Centre for Diet and Activity Research (CEDAR), a UKCRC Public Health Research Centre of Excellence  
12 367 which also hosted SS and AG. Funding from the British Heart Foundation, Economic and Social Research  
13 368 Council, Medical Research Council, the National Institute for Health Research, and the Wellcome Trust, under the  
14 369 auspices of the UK Clinical Research Collaboration, is gratefully acknowledged. AG is supported by a National  
15 370 Institute of Health Research (NIHR) post-doctoral fellowship. The views and opinions expressed in this article are  
16 371 those of the authors and do not necessarily reflect those of the NIHR, the Department of Health or other study  
17 372 funders. The EPIC-Norfolk study is funded by the Cancer Research Campaign; the Medical Research Council,  
18 373 the Stroke Association, the British Heart Foundation, the Department of Health, the Europe Against Cancer  
19 374 Programme Commission of the European Union and Ministry of Agriculture, Fisheries and Food. The authors  
20 375 thank the EPIC-Norfolk staff and participants for their valuable contributions.

21 376 **Competing Interests:** None

22 377 **Ethics Approval:** The Norwich District Health Authority Ethics Committee approved the study design and all  
23 378 participants provided written informed consent.

24 379

## 380 REFERENCES

- 381 1. Woodcock J, Banister D, Edwards P, Prentice AM, Roberts I. Energy and Health 3. *Lancet*  
382 2007;370(9592):1078-88.
- 383 2. Shephard R. Is active commuting the answer to population health? *Sports Med* 2008;38(9):751-58.
- 384 3. Jarrett J, Woodcock J, Griffiths UK, Chalabi Z, Edwards P, Roberts I, et al. Effect of increasing active  
385 travel in urban England and Wales on costs to the National Health Service. *Lancet*  
386 2012;379:2198-205.
- 387 4. Woodcock J, Givoni M, Morgan AS. Health Impact Modelling of Active Travel Visions for England  
388 and Wales Using an Integrated Transport and Health Impact Modelling Tool (ITHIM). *Plos*  
389 *One* 2013;8(1):e51462.
- 390 5. Kahlmeier S, Cavill N, Dinsdale H, Rutter H, Götschi T, Foster C, et al. Health economic assessment  
391 tools (HEAT) for walking and for cycling: World Health Organization, 2011.
- 392 6. Andersen L, Schnohr P, Schroll M, Hein A. All-cause mortality associated with physical activity  
393 during leisure time, work, sports, and cycling to work. *Arch Intern Med* 2000;160:1621-28.
- 394 7. Matthews CE, Jurj AL, Shu X, Li H-L, Yang G, Li Q, et al. Influence of exercise, walking, cycling and  
395 overall nonexercise physical activity on mortality in Chinese women. *Am J Epid*  
396 2007;165(12):1343-50.
- 397 8. Sahlqvist S, Song Y, Ogilvie D. Is active travel associated with greater physical activity? The  
398 contribution of commuting and non-commuting active travel to total physical activity in  
399 adults. *Prev Med* 2012;55(3):206-11.
- 400 9. Sahlqvist S, Goodman A, Cooper A, Ogilvie D, consortium. oboti. Change in active travel and  
401 changes in recreational and total physical activity in adults: longitudinal findings from the  
402 iConnect study. *Int J BehavNutPhys Act* 2013;10(1):28.
- 403 10. Besson H, Ekelund U, Brage S, Luben R, Bingham S, Khaw K-T, et al. Relationship between  
404 subdomains of total physical activity and mortality. *Med Sci Sport Exer* 2008;40(11):1909-15.
- 405 11. Khaw K-T, Jakes R, Bingham S, Welch A, Luben R, Day N, et al. Work and leisure time physical  
406 activity assessed using a simple, pragmatic, validated questionnaire and incident  
407 cardiovascular disease and all-cause mortality in men and women: The European  
408 Prospective Investigation into Cancer in Norfolk prospective population study. *Int J*  
409 *Epidemiol* 2006;35(4):1034-43.
- 410 12. Wareham N, Jakes R, Rennie K, Mitchell J, Hennings S, Day N. Validity and repeatability of the  
411 EPIC-Norfolk Physical Activity Questionnaire. *Int J Epidemiol* 2002;31:168-74.
- 412 13. Day N, Oakes S, Luben R, Khaw K-T, Bingham S, Welch A, et al. EPIC Norfolk: Study design and  
413 characteristics of the cohort. *Br J Cancer* 1999;80(Supplement 1):95-103.
- 414 14. Bingham S, Gill C, Welch A, Cassidy A, Runswick S, al e. Validation of dietary assessment  
415 methods in the UK arm of EPIC using weighted records, and 24-hour urinary nitrogen and  
416 potassium and serum vitamin C and carotenoids as biomarkers. *Int J Epidemiol*  
417 1997;26:S137-S51
- 418 15. Ainsworth BE, Haskell WL, Leon A, Jacobs DJ, Montoye H, Sallis J, et al. Compendium of physical  
419 activities: classification of energy costs of human physical activities. *Med Sci SportExer*  
420 1993;25(10):1192.
- 421 16. Sahlqvist S, Heesch K. Characteristics of utility cyclists in Queensland, Australia: An examination  
422 of the association between individual, social and environmental factors and utility cycling. *J*  
423 *Phys Act Health* 2012;9:818-28.
- 424 17. Winters M, Friesen MC, Koehoorn M, Teschke K. Utilitarian bicycling: A multilevel analysis of  
425 climate and personal influences. *Am J Prev Med* 2007;32(1):52-58.
- 426 18. Foster C, Panter J, Wareham N. Assessing the impact of road traffic on cycling for leisure and  
427 cycling to work. *Int J BehavNutPhys Act* 2011;8(1):61.
- 428 19. Pucher J, Buehler R. Making cycling irresistible: Lessons from The Netherlands, Denmark and  
429 Germany. *Transport Reviews* 2008;28(4):495-528.
- 430 20. Yang L, Panter J, Griffin SJ, Ogilvie D. Associations between active commuting and physical  
431 activity in working adults: Cross-sectional results from the Commuting and Health in  
432 Cambridge study. *Prev Med* 2012;55(5):453-57.

- 1 433 21. Wanner M, Götschi T, Martin-Diener E, Kahlmeier S, Martin BW. Active Transport, Physical  
2 434 Activity, and Body Weight in Adults: A Systematic Review. *Am J Prev Med* 2012;42(5):493-  
3 435 502.
- 4 436 22. Wagner A, Simon C, Evans A, Ferrières J, Montaye M, Ducimetière P, et al. Physical Activity and  
5 437 Coronary Event Incidence in Northern Ireland and France. *Circulation* 2002;105(19):2247-52.
- 6 438 23. Hamer M, Chida Y. Active commuting and cardiovascular risk: a meta-analytic review. *Prev Med*  
7 439 2008;46:9-13.
- 8 440 24. Park S, Rink LD, Wallace JP. Accumulation of physical activity leads to a greater blood pressure  
9 441 reduction than a single continuous session, in prehypertension. *J Hyper* 2006;24:1761-70.
- 10 442 25. Altna TS, Michaelson JL, Ball SD, Thomas TR. Single sessions of intermittent and continuous  
11 443 exercise and postprandial lipemia. *Med Sci Spor Exer* 2004;36(8):1364-71.
- 12 444 26. Schnohr P, Marott JL, Jensen JS, Jensen GB. Intensity versus duration of cycling, impact on all-  
13 445 cause and coronary heart disease mortality: the Copenhagen City Heart Study. *Euro J Prev*  
14 446 *Cardiol* 2012;19(1):73-80.
- 15 447 27. Goodman A, Brand C, Ogilvie D. Associations of health, physical activity and weight status with  
16 448 motorised travel and transport carbon dioxide emissions: a cross-sectional, observational  
17 449 study. *Environ Health* 2012;11(1):52.
- 18  
19  
20 450  
21  
22 451  
23  
24 452  
25  
26  
27  
28  
29  
30  
31  
32  
33  
34  
35  
36  
37  
38  
39  
40  
41  
42  
43  
44  
45  
46  
47  
48  
49  
50  
51  
52  
53  
54  
55  
56  
57  
58  
59  
60

## 453 TABLES

454 Table 1: Cycling exposure measures calculated from the EPAQ2 questionnaire administered at the  
455 second health assessment

| Exposure                             | Calculation                                                                                                                                                                                                                                                                                                                                                                                                                                                                                                                                                                                                                                                                                                                                                                                                                                                                                                                                                                                                                                                                                                           |
|--------------------------------------|-----------------------------------------------------------------------------------------------------------------------------------------------------------------------------------------------------------------------------------------------------------------------------------------------------------------------------------------------------------------------------------------------------------------------------------------------------------------------------------------------------------------------------------------------------------------------------------------------------------------------------------------------------------------------------------------------------------------------------------------------------------------------------------------------------------------------------------------------------------------------------------------------------------------------------------------------------------------------------------------------------------------------------------------------------------------------------------------------------------------------|
| <i>Commuter cycling</i>              | Respondents were asked how frequently they normally travelled to work by car, public transport, bike or on foot (response options were 'always', 'usually', 'occasionally' or 'never/rarely'). Responses were converted to fractions (always = 1, usually = 0.75, occasionally = 0.25, never / rarely = 0). Participants reported the distance between home and work and the average number of times per week they made this journey (multiplied by two to account for the return journey). When cycling was the only mode selected, total weekly distance cycled was calculated by multiplying the distance from home to work by the number of journeys made. When cycling was selected alongside other modes, the distance cycled was weighted according to the frequency of cycling relative to the frequency of the other modes reported. For example, if a respondent selected 'always' for both cycling and driving it was assumed that cycling accounted for 10%, and driving for 90% of the distance travelled. Total number of journeys was then multiplied by the weighted distance travelled (miles/week). |
| <i>Non-commuting utility cycling</i> | Respondents were asked to recall the average number of journeys they made by bicycle to get about apart from going to work for each of the following distances: 'less than 0.5 miles', '0.5 miles to 1.5 miles', '1.5 to 2.5 miles', '2.5 to 3.5 miles', '3.5 to 5.5 miles', and 'more than 5.5 miles'. Total weekly distance travelled was computed by multiplying the reported number of trips by the midpoint value of each distance category (assumed to be 0.25 for <0.5 miles and 6 for >5.5 miles). These values were then summed to provide a measure of distance travelled (miles/week).                                                                                                                                                                                                                                                                                                                                                                                                                                                                                                                     |
| <i>All utility cycling</i>           | Distance travelled for non-commuting utility cycling was added to distance travelled for commuting cycling to derive a measure of total utility cycling (miles/week).                                                                                                                                                                                                                                                                                                                                                                                                                                                                                                                                                                                                                                                                                                                                                                                                                                                                                                                                                 |
| <i>Recreational cycling</i>          | Respondents reported the average time spent 'cycling for pleasure' per session and the frequency of such sessions: 'none', 'less than once a month', 'once a month', 'two to three times a month', 'once a week', 'two to three times a week', 'four to five times a week', or 'everyday'. Average weekly cycling duration was computed by converting the frequency into a weekly numerical value (e.g. 0.5/52 for 'less than once a month' and (2.5*12)/52 for '2 to 3 times per month'). Time spent cycling (min/week) was computed by multiplying the average session duration by the average weekly frequency.                                                                                                                                                                                                                                                                                                                                                                                                                                                                                                    |
| <i>Total cycling</i>                 | To enable a measure of total cycling to be derived and to allow for comparisons with previous studies the distance travelled for utility cycling was converted into an estimated duration. Based on self-report data from a recent study of UK adults, we assumed an average cycling speed of 10 miles/hour. <sup>27</sup> A measure of total time spent cycling (min/week) was derived by summing time spent in commuting, other utility and recreational cycling.                                                                                                                                                                                                                                                                                                                                                                                                                                                                                                                                                                                                                                                   |

456

457

458 **Table 2: Descriptive characteristics of sample [N (%)] at first health assessment (n=22,450) by cycling**  
 459 **(yes, no)**

| Characteristic                     | 0 min/week: N<br>(column %) | ≥ 1 min/week: N<br>(column %) | OR for any cycling<br>(95%CI) <sup>a</sup> |
|------------------------------------|-----------------------------|-------------------------------|--------------------------------------------|
| Sex                                |                             |                               |                                            |
| Man                                | 3880 (66.9)                 | 1920 (72.0)                   | 1.0                                        |
| Woman                              | 5436 (33.1)                 | 2110 (28.0)                   | 0.92 (0.86, 0.98)                          |
| Age (yrs)                          |                             |                               |                                            |
| 40 – 55                            | 2096 (58.1)                 | 1498 (41.7)                   | 1.0                                        |
| 50 – 65                            | 3105 (67.4)                 | 1473 (32.2)                   | 0.72 (0.67, 0.78)                          |
| ≥65                                | 4115 (79.4)                 | 1059 (20.5)                   | 0.44 (0.40, 0.49)                          |
| Education Level                    |                             |                               |                                            |
| Degree or equivalent               | 1280 (65.6)                 | 670 (34.4)                    | 1.0                                        |
| 'A' Level or equivalent            | 3867 (69.2)                 | 1719 (30.8)                   | 0.91 (0.81, 1.02)                          |
| GCSE or equivalent                 | 1054 (71.0)                 | 431 (29.0)                    | 1.02 (0.95, 1.11)                          |
| No formal qualification            | 3115 (72.09)                | 1210 (28.0)                   | 1.29 (1.15, 1.44)                          |
| Social Class                       |                             |                               |                                            |
| Professional                       | 665 (66.4)                  | 336 (33.6)                    | 1.0                                        |
| Managerial / technical             | 5269 (71.8)                 | 2071 (28.2)                   | 0.90 (0.79, 1.02)                          |
| Skilled / partially skilled labour | 3078 (67.7)                 | 1469 (32.3)                   | 1.15 (1.00, 1.31)                          |
| Unskilled labour                   | 304 (66.4)                  | 154 (33.6)                    | 1.36 (1.08, 1.64)                          |
| Paid Employment                    |                             |                               |                                            |
| No                                 | 8578 (81.0)                 | 2080 (19.0)                   | 1.0                                        |
| Yes                                | 8365 (72.5)                 | 2127 (27.2)                   | 1.05 (0.97, 1.14)                          |

460 <sup>a</sup>Adjusted for all other variables in the table

461 OR = odds ratio, CI = 95% confidence interval

462

Table 3: Prospective associations over 15 years between total cycling and mortality (all-cause, cardiovascular and cancer) in 22,450 participants

| Total cycling             | FU yrs<br>Mean<br>(SD) | All-cause mortality |                      |                      | Cardiovascular mortality |                      |                      | Cancer mortality    |                      |                      |
|---------------------------|------------------------|---------------------|----------------------|----------------------|--------------------------|----------------------|----------------------|---------------------|----------------------|----------------------|
|                           |                        | Events<br>N (%)     | Hazard Ratio (95%CI) |                      | Events<br>N (%)          | Hazard Ratio (95%CI) |                      | Event<br>S<br>N (%) | Hazard Ratio (95%CI) |                      |
|                           |                        |                     | Model A <sup>a</sup> | Model B <sup>b</sup> |                          | Model A <sup>a</sup> | Model B <sup>b</sup> |                     | Model A <sup>a</sup> | Model B <sup>b</sup> |
| 0 min/week                | 15.2<br>(3.4)          | 3,686<br>(21.3)     | 1                    | 1                    | 1179<br>(6.8)            | 1                    | 1                    | 1352<br>(7.8)       | 1                    | 1                    |
| 1 – 59 min/week           | 15.7<br>(2.6)          | 100<br>(10.8)       | 0.86 (0.71, 1.07)    | 0.96 (0.78, 1.17)    | 25<br>(2.7)              | 0.73 (0.49, 1.08)    | 0.83 (0.56, 1.24)    | 44<br>(4.7)         | 0.91 (0.68, 1.24)    | 0.99 (0.73, 1.34)    |
| ≥60 min/week              | 15.7<br>(3.0)          | 612<br>(14.3)       | 0.86 (0.79, 0.94)**  | 0.91 (0.84, 0.99)*   | 179<br>(4.2)             | 0.81 (0.69, 0.95)*   | 0.87 (0.74, 1.02)    | 252<br>(5.9)        | 0.89 (0.77, 1.01)    | 0.93 (0.81, 1.06)    |
| <i>p</i> for linear trend |                        |                     | 0.02                 | 0.06                 |                          | 0.04                 | 0.09                 |                     | 0.20                 | 0.23                 |

\**p* < .05, \*\**p* < .01, \*\*\**p* < .001; 95% CI: 95% confidence interval; FU: follow-up

<sup>a</sup>Adjusted for age, sex, education level and social class

<sup>b</sup>Further adjusted for smoking status, family history of cancer or cardiovascular disease, and other physical activity (walking and other exercise)

Table 4: Prospective association over 11.5 years between cycling (total and domain specific) and mortality (all-cause, cardiovascular and cancer) in 13,346 participants

|                                         | FU yrs<br>Mean<br>(SD) | All-cause mortality |                      |                      | Cardiovascular mortality |                      |                      | Cancer mortality |                      |                      |
|-----------------------------------------|------------------------|---------------------|----------------------|----------------------|--------------------------|----------------------|----------------------|------------------|----------------------|----------------------|
|                                         |                        | Events<br>N (%)     | Hazard Ratio (95%CI) |                      | Events<br>N (%)          | Hazard Ratio (95%CI) |                      | Events<br>N (%)  | Hazard Ratio (95%CI) |                      |
|                                         |                        |                     | Model A <sup>a</sup> | Model B <sup>b</sup> |                          | Model A <sup>a</sup> | Model B <sup>b</sup> |                  | Model A <sup>a</sup> | Model B <sup>b</sup> |
| <b>Commuting</b>                        |                        |                     |                      |                      |                          |                      |                      |                  |                      |                      |
| 0 miles/week<br>(0 min/week)            | 11.1<br>(2.0)          | 1630<br>(13.1)      | 1                    | 1                    | 474<br>(3.8)             | 1                    | 1                    | 679<br>(5.4)     | 1                    | 1                    |
| 0.01-9.99 miles/week<br>(1-59 min/week) | 11.5<br>(1.6)          | 29<br>(4.9)         | 0.87 (0.60, 1.26)    | 0.96 (0.66, 1.39)    | 9<br>(1.5)               | 1.09 (0.56, 2.13)    | 1.23 (0.63, 2.40)    | 16<br>(2.7)      | 0.90 (0.55, 1.49)    | 0.95 (0.57, 1.57)    |
| ≥10 miles/week<br>(≥60 min/week)        | 11.5<br>(1.4)          | 11<br>(4.0)         | 0.80 (0.44, 1.46)    | 0.91 (0.50, 1.65)    | 2<br>(0.7)               | 0.61 (0.15, 2.47)    | 0.71 (0.18, 2.90)    | 5<br>(1.8)       | 0.66 (0.27, 1.59)    | 0.68 (0.28, 1.66)    |
| <i>p</i> for linear trend               |                        |                     | 0.42                 | 0.74                 |                          | 1.00                 | 0.72                 |                  | 0.28                 | 0.34                 |
| <b>All Utility</b>                      |                        |                     |                      |                      |                          |                      |                      |                  |                      |                      |
| 0 miles/week<br>(0 min/week)            | 11.1<br>(2.0)          | 1383<br>(13.2)      | 1                    | 1                    | 392<br>(3.8)             | 1                    | 1                    | 580<br>(5.5)     | 1                    | 1                    |
| 0.01-9.99 miles/week<br>(1-59 min/week) | 11.6<br>(1.8)          | 233<br>(10.4)       | 0.90 (0.78, 1.04)    | 0.95 (0.83, 1.09)    | 75<br>(3.4)              | 1.04 (0.81, 1.34)    | 1.10 (0.85, 1.41)    | 97<br>(4.3)      | 0.85 (0.69, 1.06)    | 0.90 (0.72, 1.11)    |
| ≥10 miles/week<br>(≥60 min/week)        | 11.4<br>(1.8)          | 54<br>(8.4)         | 1.01 (0.77, 1.33)    | 1.10 (0.83, 1.44)    | 18<br>(2.8)              | 1.30 (0.81, 2.10)    | 1.44 (0.89, 2.31)    | 23<br>(3.6)      | 0.89 (0.58, 1.35)    | 0.92 (0.61, 1.41)    |
| <i>p</i> for linear trend               |                        |                     | 0.71                 | 0.33                 |                          | 0.81                 | 0.52                 |                  | 0.94                 | 0.89                 |
| <b>Recreational</b>                     |                        |                     |                      |                      |                          |                      |                      |                  |                      |                      |
| 0 min/week                              | 11.1<br>(2.1)          | 1483<br>(13.7)      | 1                    | 1                    | 438<br>(4.0)             | 1                    | 1                    | 608<br>(5.6)     | 1                    | 1                    |
| 1 – 59 min/week                         | 11.4<br>(1.5)          | 104<br>(5.9)        | 0.81 (0.66, 0.99)*   | 0.87 (0.69, 1.04)    | 25<br>(1.4)              | 0.72 (0.48, 1.09)    | 0.75 (0.50, 1.13)    | 56<br>(3.2)      | 0.90 (0.68, 1.19)    | 0.95 (0.71, 1.25)    |
| ≥60 min/week                            | 11.3<br>(1.8)          | 83<br>(11.1)        | 1.13 (0.90, 1.41)    | 1.25 (0.99, 1.55)    | 22<br>(3.0)              | 1.07 (0.69, 1.65)    | 1.19 (0.77, 1.84)    | 36<br>(4.8)      | 1.06 (0.75, 1.49)    | 1.12 (0.80, 1.58)    |
| <i>p</i> for linear trend               |                        |                     | 0.12                 | 0.05                 |                          | 0.48                 | 0.32                 |                  | 0.46                 | 0.35                 |
| <b>Total cycling</b>                    |                        |                     |                      |                      |                          |                      |                      |                  |                      |                      |
| 0 min/week                              | 11.1<br>(2.1)          | 1308<br>(14.0)      | 1                    | 1                    | 379<br>(4.1)             | 1                    | 1                    | 540<br>(5.8)     | 1                    | 1                    |
| 1 – 59 min/week                         | 11.5<br>(1.8)          | 236<br>(8.9)        | 0.87 (0.76, 1.00)*   | 0.90 (0.79, 1.04)    | 72<br>(2.7)              | 0.95 (0.74, 1.23)    | 0.99 (0.76, 1.23)    | 105<br>(4.0)     | 0.86 (0.70, 1.06)    | 0.90 (0.73, 1.11)    |
| ≥60 min/week                            | 11.4<br>(1.7)          | 126<br>(9.2)        | 1.00 (0.83, 1.21)    | 1.11 (0.91, 1.32)    | 34<br>(2.5)              | 1.00 (0.70, 1.43)    | 1.10 (0.77, 1.57)    | 55<br>(4.0)      | 0.92 (0.69, 1.22)    | 0.98 (0.74, 1.30)    |
| <i>p</i> for linear trend               |                        |                     | 0.08                 | 0.26                 |                          | 0.36                 | 0.18                 |                  | 0.81                 | 0.51                 |

39 \**p* < .05, \*\**p* < .01, \*\*\**p* < .001; 95% CI: 95% confidence interval; FU: follow-up

40 <sup>a</sup>Adjusted for age, sex, education level and social class

41 <sup>b</sup>Further adjusted for smoking status, family history of cancer or cardiovascular disease, and all other physical activity



Table 5: Associations between time spent cycling (total and sub domains; min/week) and physical activity (MET.hr/week) in 13,346 participants

|                                      | N     | Leisure Time PA <sup>a</sup> (MET.hr/week) |                                              | Total MVPA <sup>b</sup> (MET.hr/week) |                                              | Total PA <sup>c</sup> (MET.hr/week) |                                              |
|--------------------------------------|-------|--------------------------------------------|----------------------------------------------|---------------------------------------|----------------------------------------------|-------------------------------------|----------------------------------------------|
|                                      |       | Mean (SD)                                  | Regression coefficient (95% CI) <sup>d</sup> | Mean (SD)                             | Regression coefficient (95% CI) <sup>d</sup> | Mean (SD)                           | Regression coefficient (95% CI) <sup>d</sup> |
| Commuter cycling                     |       |                                            |                                              |                                       |                                              |                                     |                                              |
| 0 miles/week (0 min/week)            | 12484 | 39.4 (37.7)                                | 0                                            | 61.9 (52.3)                           | 0                                            | 82.1 (44.6)                         | 0                                            |
| 0.01-9.99 miles/week (1-59 min/week) | 587   | 35.3 (32.4)                                | -1.6 (-4.7, 1.4)                             | 82.4 (58.0)                           | 12.2 (8.2, 16.2)***                          | 104.9 (46.8)                        | 11.8 (8.3, 15.3)***                          |
| ≥10 miles/week (≥60 min/week)        | 275   | 42.9 (37.6)                                | 1.9 (-2.5, 6.3)                              | 116.6 (63.0)                          | 35.3 (29.5, 41.0)***                         | 128.6 (49.2)                        | 29.7 (24.7, 34.7)***                         |
| All utility cycling                  |       |                                            |                                              |                                       |                                              |                                     |                                              |
| 0 miles/week (0 min/week)            | 10462 | 38.2 (37.1)                                | 0                                            | 60.5 (51.7)                           | 0                                            | 81.2 (44.2)                         | 0                                            |
| 0.01-9.99 miles/week (1-59 min/week) | 2237  | 42.9 (38.5)                                | 3.7 (2.1, 5.4)***                            | 69.6 (55.4)                           | 5.5 (3.3, 7.7)***                            | 89.2 (46.9)                         | 4.4 (2.5, 6.3)***                            |
| ≥10 miles/week (≥60 min/week)        | 647   | 46.7 (39.3)                                | 6.9 (3.9, 9.8)***                            | 99.0 (60.4)                           | 25.0 (21.2, 28.9)***                         | 112.1 (50.0)                        | 20.2 (16.9, 23.6)***                         |
| Leisure-time cycling                 |       |                                            |                                              |                                       |                                              |                                     |                                              |
| 0 min/week                           | 10843 | 37.3 (36.5)                                | 0                                            | 60.0 (51.7)                           | 0                                            | 80.5 (44.1)                         | 0                                            |
| 1-59 min/week                        | 1756  | 41.0 (35.4)                                | 4.2 (2.3, 6.1)***                            | 73.8 (53.9)                           | 4.7 (2.3, 7.2)***                            | 95.3 (45.3)                         | 4.9 (2.8, 7.0)***                            |
| ≥60 min/week                         | 747   | 64.6 (46.6)                                | 25.6 (22.9, 28.2)***                         | 98.0 (61.5)                           | 27.4 (23.9, 31.0)***                         | 110.2 (52.5)                        | 21.9 (18.9, 25.0)***                         |
| Total cycling                        |       |                                            |                                              |                                       |                                              |                                     |                                              |
| 0 min/week                           | 9316  | 37.2 (36.6)                                | 0                                            | 58.5 (50.8)                           | 0                                            | 79.3 (43.6)                         | 0                                            |
| 1-59 min/week                        | 2654  | 39.7 (35.8)                                | 3.2 (1.6, 4.9)***                            | 67.0 (53.1)                           | 2.9 (0.8, 5.0)*                              | 88.3 (45.0)                         | 2.6 (0.8, 4.4)*                              |
| ≥60 min/week                         | 1376  | 52.4 (43.6)                                | 14.2 (12.2, 16.3)***                         | 94.4 (60.5)                           | 24.1 (21.3, 26.8)***                         | 108.7 (50.7)                        | 19.5 (17.1, 21.8)***                         |

\*p &lt; .05, \*\*p &lt; .01, \*\*\*p &lt; .001

SD: standard deviation; 95% CI: 95% confidence interval; MVPA: moderate-to-vigorous physical activity; PA: physical activity

<sup>a</sup>Computed as the sum of all moderate-to-vigorous leisure-time physical activity<sup>b</sup>Computed as the sum of all moderate-to-vigorous physical activity across all domains (leisure-time, household, work, commute)<sup>c</sup>Computed as the sum of all light and moderate-to-vigorous physical activity across all domains (leisure-time, household, work, commute)<sup>d</sup>Adjusted for age, sex, education and social class

1  
2  
3 **Appendix Part 1**  
4  
5  
6

7 **Physical Activity Questions at First Health Assessment**  
8

9 In a typical week during the past 12 months, how many hours did you spend on each of the following  
10 activities? (Put '0' if none)  
11

12 Walking, including walking to work and during leisure time

13 In summer \_\_\_ hours per week

14 In winter \_\_\_ hours per week  
15  
16

17 Cycling, including cycling to work and during leisure time

18 In summer \_\_\_ hours per week

19 In winter \_\_\_ hours per week  
20  
21

22 Other physical exercise such as keep fit, aerobics, swimming, jogging

23 In summer \_\_\_ hours per week

24 In winter \_\_\_ hours per week  
25  
26  
27  
28  
29  
30  
31  
32  
33  
34  
35  
36  
37  
38  
39  
40  
41  
42  
43  
44  
45  
46  
47  
48  
49  
50  
51  
52  
53  
54  
55  
56  
57  
58  
59  
60

## Appendix Part 2

Table A1: Baseline characteristics (first health assessment) of the cohort (n=22,450) by all- cause, cardiovascular and cancer mortality outcomes; values are mean (SD) unless otherwise indicated

| Baseline Characteristics           | All-cause mortality |                     | Cardiovascular mortality |                    | Cancer mortality  |                    |
|------------------------------------|---------------------|---------------------|--------------------------|--------------------|-------------------|--------------------|
|                                    | Deceased (n=4380)   | Survivor (n=18,070) | Deceased (n=1379)        | Survivor (n=21071) | Deceased (n=1639) | Survivor (n=20811) |
| Follow-up years                    | 10.5 (4.6)          | 16.5 (1.3)***       | 10.2 (4.7)               | 15.7 (2.9)***      | 10.0 (4.4)        | 15.8 (2.8)***      |
| Male, N (%)                        | 2395 (54.7)         | 7746 (42.9)***      | 782 (56.7)               | 9359 (44.4)***     | 914 (55.8)        | 9227 (44.3)***     |
| Age (years)                        | 66.1 (7.7)          | 56.1 (8.5)***       | 67.7 (6.7)               | 57.5 (9.0)***      | 63.6 (8.2)        | 57.6 (9.2)***      |
| Education Level, N (%)             |                     |                     |                          |                    |                   |                    |
| No formal qualification            | 2049 (46.8)         | 5957 (33.0)         | 671 (48.7)               | 7335 (34.8)        | 695 (42.4)        | 7311 (35.1)        |
| GCSE or equivalent                 | 353 (8.1)           | 2017 (11.2)         | 105 (7.6)                | 2265 (10.8)        | 148 (9.0)         | 2222 (10.7)        |
| A-Level or equivalent              | 1617 (36.9)         | 7511 (41.6)         | 495 (35.9)               | 8633 (41.0)        | 654 (39.9)        | 8474 (40.7)        |
| Degree or equivalent               | 361 (8.2)           | 2585 (14.3)***      | 108 (7.8)                | 2838 (13.5)***     | 8.7 (142)         | 2804 (13.5)***     |
| Social class, N (%)                |                     |                     |                          |                    |                   |                    |
| Professional                       | 220 (5.0)           | 1354 (7.5)          | 77 (5.6)                 | 1497 (7.1)         | 79 (4.8)          | 1495 (7.2)         |
| Managerial / technical             | 2310 (52.7)         | 9570 (53.0)         | 719 (52.1)               | 11161 (53.0)       | 834 (50.9)        | 54.1 (11046)       |
| Skilled / partially skilled labour | 1642 (37.5)         | 6568 (36.4)         | 502 (36.4)               | 7708 (36.6)        | 648 (39.5)        | 7562 (36.3)        |
| Unskilled labour                   | 208 (4.8)           | 578 (3.2)***        | 81 (5.9)                 | 705 (3.4)***       | 78 (4.8)          | 708 (3.4)***       |
| Family history of CVD, N (%)       | 2257 (51.5)         | 2123 (50.2)         | 756 (54.8)               | 10570 (50.2)**     | 797 (48.6)        | 10529 (50.6)       |
| Family history of cancer, N (%)    | 1706 (39.0)         | 7039 (39.0)         | 901 (65.3)               | 12799 (60.8)**     | 709 (43.3)        | 38.6 (8036)***     |
| Smoking Status, N (%)              |                     |                     |                          |                    |                   |                    |
| Current                            | 651 (14.9)          | 1991 (11.0)         | 205 (14.9)               | 2437 (11.6)        | 281 (17.1)        | 2361 (11.3)        |
| Former                             | 2181 (49.8)         | 7137 (39.5)         | 706 (51.2)               | 8612 (40.9)        | 802 (48.9)        | 8516 (40.9)        |
| Never                              | 1548 (35.3)         | 8942 (49.5)***      | 468 (33.9)               | 10022 (47.6)***    | 556 (33.9)        | 9934 (47.7)***     |
| Hypertensive Medication (yes)      | 1278 (29.2)         | 2396 (13.3)***      | 517 (37.5)               | 3157 (15.0)**      | 360 (22.0)        | 11279 (78.0)***    |
| Lipid Medication (yes)             | 58 (1.6)            | 191 (1.1)           | 28 (2.0)                 | 221 (1.1)**        | 15 (0.9)          | 234 (1.1)          |
| Total energy intake (kj/day)       | 8736.4 (2527.9)     | 8611.4 (2513.5)**   | 8744.4 (2547.8)          | 8628.5 (2514.6)    | 8809.5 (2552.9)   | 8621.9 (2513.4)**  |
| Units of alcohol (units/wk)        | 7.1 (10.6)          | 7.2 (9.2)           | 6.7 (10.0)               | 7.2 (9.5)*         | 8.0 (11.5)        | 7.1 (7.0)          |

\*p &lt; 0.05; \*\*p &lt; 0.005; \*\*\*p &lt; 0.001

Table A2: Descriptive characteristics of participants [N (%)] at second health assessment (n=13346) by cycling (yes, no)

| Baseline Characteristics           | Commuter Cycling |              |                   | All Utility Cycling |             |                   | Leisure-time Cycling |             |                   |
|------------------------------------|------------------|--------------|-------------------|---------------------|-------------|-------------------|----------------------|-------------|-------------------|
|                                    | None             | Some         | OR (95% CI)       | None                | Some        | OR (95% CI)       | None                 | Some        | OR (95% CI)       |
| Sex                                |                  |              |                   |                     |             |                   |                      |             |                   |
| Male                               | 5395 (93.0)      | 405 (7.0)    | 1                 | 4424 (76.3)         | 1376 (23.7) | 1                 | 4555 (78.5)          | 1245 (21.5) | 1                 |
| Female                             | 7089 (93.9)      | 457 (6.1)    | 0.77 (0.66, 0.89) | 6038 (80.19)        | 1508 (20.0) | 0.83 (0.76, 0.91) | 5858 (83.3)          | 1258 (16.7) | 0.63 (0.56, 0.70) |
| Age (yrs)                          |                  |              |                   |                     |             |                   |                      |             |                   |
| 40 – 54                            | 3138 (87.3)      | 456 (12.7)   | 1                 | 2624 (73.07)        | 970 (27.0)  | 1                 | 2534 (70.5)          | 1060 (29.5) | 1                 |
| 55 – 64                            | 4253 (92.9)      | 325 (7.1)    | 0.50 (0.42, 0.58) | 3524 (77.0)         | 1054 (23.0) | 0.94 (0.84, 1.04) | 3651 (79.8)          | 927 (20.3)  | 0.63 (0.25, 0.34) |
| ≥65                                | 5093 (98.4)      | 81 (1.6)     | 0.10 (0.08, 0.13) | 4314 (83.4)         | 860 (16.6)  | 0.90 (0.79, 1.03) | 4658 (90.0)          | 516 (10.0)  | 0.29 (0.25, 0.34) |
| Education Level                    |                  |              |                   |                     |             |                   |                      |             |                   |
| Degree or equivalent               | 1807 (92.7)      | 143 (7.3)    | 1                 | 1487 (76.3)         | 463 (23.7)  | 1                 | 1493 (76.6)          | 457 (23.4)  | 1                 |
| A-Level or equivalent              | 5237 (93.8)      | 349 (6.3)    | 0.81 (0.66, 1.00) | 4404 (78.8)         | 1182 (21.2) | 0.90 (0.79, 1.03) | 4440 (79.5)          | 1146 (20.5) | 0.94 (0.82, 1.07) |
| GCSE or equivalent                 | 1394 (93.9)      | 91 (6.1)     | 0.78 (0.59, 1.00) | 1196 (80.5)         | 289 (19.5)  | 0.82 (0.69, 0.98) | 1196 (80.5)          | 289 (19.5)  | 0.86 (0.72, 1.03) |
| No formal qualification            | 4046 (93.6)      | 279 (6.5)    | 1.01 (0.79, 1.29) | 3375 (78.0)         | 950 (22.0)  | 1.05 (0.91, 1.22) | 3714 (85.9)          | 611 (14.1)  | 0.75 (0.64, 0.88) |
| Social Class                       |                  |              |                   |                     |             |                   |                      |             |                   |
| Professional                       | 932 (93.1)       | 69 (6.9)     | 1                 | 764 (76.3)          | 237 (23.7)  | 1                 | 775 (77.4)           | 226 (22.6)  | 1                 |
| Managerial / technical             | 6990 (95.2)      | 350 (4.8)    | 0.72 (0.54, 0.95) | 5927 (80.8)         | 1413 (19.3) | 0.78 (0.66, 0.93) | 5973 (81.4)          | 1357 (18.6) | 0.85 (0.72, 1.05) |
| Skilled / partially skilled labour | 4147 (91.2)      | 400 (8.8)    | 1.36 (1.01, 1.82) | 3438 (75.6)         | 1109 (24.4) | 1.03 (0.87, 1.23) | 3708 (81.6)          | 839 (18.5)  | 0.86 (0.72, 1.04) |
| Unskilled labour                   | 415 (90.6)       | 43 (9.4)     | 1.60 (1.05, 2.45) | 333 (72.7)          | 125 (27.3)  | 1.25 (0.96, 1.63) | 387 (84.5)           | 71 (15.5)   | 0.79 (0.58, 1.08) |
| Paid Employment                    |                  |              |                   |                     |             |                   |                      |             |                   |
| Yes                                | 6306 (88.0)      | 6178 (100.0) | n/a               | 5148 (71.8)         | 2020 (28.2) | 1                 | 5118 (76.0)          | 1617 (24.0) | 1                 |
| No                                 | 862 (12.0)       | 0 (0)        |                   | 5314 (86.0)         | 864 (14.0)  | 2.33 (2.09, 2.60) | 5037 (86.9)          | 757 (13.1)  | 1.14 (1.02, 1.28) |

Table A3: Associations between demographic characteristics of participants at the first health assessment (n=22,450) and all-cause, cardiovascular disease and cancer mortality

| Demographic characteristics |                                    | N (%)         | All-cause mortality |                              | CVD mortality |                              | Cancer mortality |                              |
|-----------------------------|------------------------------------|---------------|---------------------|------------------------------|---------------|------------------------------|------------------|------------------------------|
|                             |                                    |               | No. deaths          | Crude mortality rate (95%CI) | No. deaths    | Crude mortality rate (95%CI) | No. deaths       | Crude mortality rate (95%CI) |
| Sex                         | Male                               | 10,141 (45.2) | 2395                | 1.0                          | 782           | 1.0                          | 914              | 1.0                          |
|                             | Female                             | 12,309 (54.8) | 1985                | 0.62 (0.58, 0.66)            | 597           | 0.61 (0.55, 0.68)            | 725              | 0.63 (0.57, 0.70)            |
| Age (years)                 | 40 – 54                            | 9043 (40.3)   | 462                 | 1.0                          | 90            | 1.0                          | 270              | 1.0                          |
|                             | 55 – 64                            | 6936 (30.9)   | 1044                | 3.29 (2.94, 3.7)             | 249           | 3.7 (2.9, 4.7)               | 537              | 2.7 (2.3, 3.2)               |
|                             | ≥65                                | 6471 (28.8)   | 2874                | 14.8 (13.4, 16.5)            | 1040          | 19.0 (15.3, 23.7)            | 832              | 4.8 (4.2, 5.5)               |
| Education Level             | Degree or equivalent               | 8006 (35.7)   | 8006                | 1.0                          | 671           | 1.0                          | 695              | 1.0                          |
|                             | A-level                            | 2370 (10.6)   | 2370                | 0.51 (0.45, 0.58)            | 105           | 0.51 (0.41, 0.63)            | 148              | 0.70 (0.58, 0.84)            |
|                             | GCSE                               | 9128 (40.7)   | 9128                | 0.63 (0.58, 0.67)            | 495           | 0.63 (0.56, 0.71)            | 654              | 0.81 (0.73, 0.91)            |
|                             | No formal qualification            | 2946 (13.1)   | 2946                | 0.41 (0.36, 0.46)            | 108           | 0.42 (0.34, 0.10)            | 142              | 0.53 (0.44, 0.64)            |
| Social Class                | Professional                       | 1574 (7.0)    | 220                 | 1.0                          | 77            | 1.0                          | 79               | 1.0                          |
|                             | Managerial / technical             | 11880 (52.9)  | 2310                | 1.49 (1.28, 1.73)            | 719           | 1.25 (0.98, 1.59)            | 834              | 1.42 (1.13, 1.81)            |
|                             | Skilled / partially skilled labour | 8210 (36.6)   | 1642                | 1.54 (1.32, 1.79)            | 502           | 1.27 (0.99, 1.62)            | 648              | 1.62 (1.28, 2.06)            |
|                             | Unskilled labour                   | 786 (3.5)     | 208                 | 2.21 (1.79, 2.74)            | 81            | 2.23 (1.61, 3.09)            | 78               | 2.08 (1.51, 2.89)            |
| Paid employment             | No                                 | 10958 (48.8)  | 3421                | 1.0                          | 1161          | 1.0                          | 1125             | 1.0                          |
|                             | Yes                                | 11492 (51.2)  | 959                 | 0.20 (0.19, 0.22)            | 218           | 0.16 (0.14, 0.19)            | 514              | 0.41 (0.37-0.46)             |

\*p &lt; .05, \*\*p &lt; .01, \*\*\*p &lt; .001

CVD: Cardiovascular disease; 95% CI: 95% Confidence intervals

STROBE 2007 (v4) Statement—Checklist of items that should be included in reports of cohort studies

| Section/Topic             | Item # | Recommendation                                                                                                                                                                       | Reported on page # |
|---------------------------|--------|--------------------------------------------------------------------------------------------------------------------------------------------------------------------------------------|--------------------|
| Title and abstract        | 1      | (a) Indicate the study’s design with a commonly used term in the title or the abstract                                                                                               | 1                  |
|                           |        | (b) Provide in the abstract an informative and balanced summary of what was done and what was found                                                                                  | 2                  |
| <b>Introduction</b>       |        |                                                                                                                                                                                      |                    |
| Background/rationale      | 2      | Explain the scientific background and rationale for the investigation being reported                                                                                                 | 4                  |
| Objectives                | 3      | State specific objectives, including any prespecified hypotheses                                                                                                                     | 4                  |
| <b>Methods</b>            |        |                                                                                                                                                                                      |                    |
| Study design              | 4      | Present key elements of study design early in the paper                                                                                                                              | 5                  |
| Setting                   | 5      | Describe the setting, locations, and relevant dates, including periods of recruitment, exposure, follow-up, and data collection                                                      | 5                  |
| Participants              | 6      | (a) Give the eligibility criteria, and the sources and methods of selection of participants. Describe methods of follow-up                                                           | 5                  |
|                           |        | (b) For matched studies, give matching criteria and number of exposed and unexposed                                                                                                  | n/a                |
| Variables                 | 7      | Clearly define all outcomes, exposures, predictors, potential confounders, and effect modifiers. Give diagnostic criteria, if applicable                                             | 5-6, 13            |
| Data sources/ measurement | 8*     | For each variable of interest, give sources of data and details of methods of assessment (measurement). Describe comparability of assessment methods if there is more than one group | 5-6, 13            |
| Bias                      | 9      | Describe any efforts to address potential sources of bias                                                                                                                            | 5-6                |
| Study size                | 10     | Explain how the study size was arrived at                                                                                                                                            | 5                  |
| Quantitative variables    | 11     | Explain how quantitative variables were handled in the analyses. If applicable, describe which groupings were chosen and why                                                         | 6-7                |
| Statistical methods       | 12     | (a) Describe all statistical methods, including those used to control for confounding                                                                                                | 6-7                |
|                           |        | (b) Describe any methods used to examine subgroups and interactions                                                                                                                  | n/a                |
|                           |        | (c) Explain how missing data were addressed                                                                                                                                          | 5                  |
|                           |        | (d) If applicable, explain how loss to follow-up was addressed                                                                                                                       | n/a                |
|                           |        | (e) Describe any sensitivity analyses                                                                                                                                                | 6-7                |
| <b>Results</b>            |        |                                                                                                                                                                                      |                    |

1  
2  
3  
4  
5  
6  
7  
8  
9  
10  
11  
12  
13  
14  
15  
16  
17  
18  
19  
20  
21  
22  
23  
24  
25  
26  
27  
28  
29  
30  
31  
32  
33  
34  
35  
36  
37  
38  
39  
40  
41  
42  
43  
44  
45  
46  
47  
48  
49

|                          |     |                                                                                                                                                                                                              |          |
|--------------------------|-----|--------------------------------------------------------------------------------------------------------------------------------------------------------------------------------------------------------------|----------|
| Participants             | 13* | (a) Report numbers of individuals at each stage of study—eg numbers potentially eligible, examined for eligibility, confirmed eligible, included in the study, completing follow-up, and analysed            | 5        |
|                          |     | (b) Give reasons for non-participation at each stage                                                                                                                                                         | 5        |
|                          |     | (c) Consider use of a flow diagram                                                                                                                                                                           | n/a      |
| Descriptive data         | 14* | (a) Give characteristics of study participants (eg demographic, clinical, social) and information on exposures and potential confounders                                                                     | 5, 7, 14 |
|                          |     | (b) Indicate number of participants with missing data for each variable of interest                                                                                                                          | 5        |
|                          |     | (c) Summarise follow-up time (eg, average and total amount)                                                                                                                                                  | 5        |
| Outcome data             | 15* | Report numbers of outcome events or summary measures over time                                                                                                                                               | 6        |
| Main results             | 16  | (a) Give unadjusted estimates and, if applicable, confounder-adjusted estimates and their precision (eg, 95% confidence interval). Make clear which confounders were adjusted for and why they were included | 15, 16   |
|                          |     | (b) Report category boundaries when continuous variables were categorized                                                                                                                                    | n/a      |
|                          |     | (c) If relevant, consider translating estimates of relative risk into absolute risk for a meaningful time period                                                                                             | n/a      |
| Other analyses           | 17  | Report other analyses done—eg analyses of subgroups and interactions, and sensitivity analyses                                                                                                               | 7        |
| <b>Discussion</b>        |     |                                                                                                                                                                                                              |          |
| Key results              | 18  | Summarise key results with reference to study objectives                                                                                                                                                     | 8-9      |
| <b>Limitations</b>       |     |                                                                                                                                                                                                              |          |
| Interpretation           | 20  | Give a cautious overall interpretation of results considering objectives, limitations, multiplicity of analyses, results from similar studies, and other relevant evidence                                   | 9        |
| Generalisability         | 21  | Discuss the generalisability (external validity) of the study results                                                                                                                                        | 9        |
| <b>Other information</b> |     |                                                                                                                                                                                                              |          |
| Funding                  | 22  | Give the source of funding and the role of the funders for the present study and, if applicable, for the original study on which the present article is based                                                | 10       |

\*Give information separately for cases and controls in case-control studies and, if applicable, for exposed and unexposed groups in cohort and cross-sectional studies.

**Note:** An Explanation and Elaboration article discusses each checklist item and gives methodological background and published examples of transparent reporting. The STROBE checklist is best used in conjunction with this article (freely available on the Web sites of PLoS Medicine at <http://www.plosmedicine.org/>, Annals of Internal Medicine at <http://www.annals.org/>, and Epidemiology at <http://www.epidem.com/>). Information on the STROBE Initiative is available at [www.strobe-statement.org](http://www.strobe-statement.org).
